# Supplementary material
Source: MDPI journal article supplement (https://www.mdpi.com/2414-4088/6/2/9)
Supplement: s1 [file s1]

Archive with 4 entries (4 files):
- File S1 - Observation schedule.pdf
- File S2- Interview guide.pdf
- File S3 - Spreadsheet.xlsx
- File S4 - Codebook.pdf
