# Supplementary material
Source: MDPI journal article supplement (https://www.mdpi.com/2414-4088/6/2/9)
Supplement: s1 [file s1 › File S3 - Spreadsheet.xlsx]

## Sheet: Xl_Student_Use_recent(9)
NCODER_ID	X	Hardware technology	Student 0	School size	Demography	Activities.Subjects	Individual.Collaborative	Production.Consumption	Data.type	Meta.data	Data.lines	RoF.Virtual.Buttons	Software.Multimodal	MoR.Multimodal	Actions.Primary.Level	RoF Virtual.Overviews	Hardware.Other	Technology.Software	Activities.Consumption	Hardware.Tablets	Activities.Individual	MoR.Auditory	Modes.of.Representation	Activities.Social science	RoF.Virtual.Guiding	Representation.of.functions	Hardware.Laptop	Actions	Software.Visual	Activities.Languages	RoF.Virtual.Lists/notes	Software.Other	Activities.Production	RoF.Virtual.Lines	Actions.Tertiary.Level	RoF.Virtual	Software.Linguistic	Activities.Subjects2	Activities.Science	MoR.Bodily	RoF.Virtual.Entries	Actions.Secondary.Level	Activities.Swedish	Activities.Math	RoF.Physical	Activities.Aesthetic/practical subjects	Hardware.Smartphones	Activities	Semiotic.Properties
1	1	Laptop	Student 1	<500	Remote area	Swedish	Individual	Consumption	Video rec.	1	Swedish lesson .	0	0	0	0	0	0	0	0	0	0	0	0	0	0	0	0	0	0	1	0	0	0	0	0	0	0	1	0	0	0	0	1	0	0	0	0	1	0
2	2	Laptop	Student 1	<500	Remote area	Swedish	Individual	Consumption	Video rec.	2	Students are listening to teacher reading out loud.	0	0	0	0	0	0	0	1	0	1	0	0	0	0	0	0	0	0	0	0	0	0	0	0	0	0	0	0	0	0	0	0	0	0	0	0	1	0
3	3	Laptop	Student 1	<500	Remote area	Swedish	Collaborative	Production	Video rec.	3	The students get to discuss the content of the readings to the friend at the same table.	0	0	0	0	0	0	0	1	0	1	0	0	0	0	0	0	0	0	0	0	0	1	0	0	0	0	0	0	0	0	0	0	0	0	0	0	1	0
4	4	Laptop	Student 1	<500	Remote area	Swedish	Collaborative	Production	Video rec.	4	The friend needs to continue discuss the story after two minutes.	0	0	0	0	0	0	0	0	0	1	0	0	0	0	0	0	0	0	0	0	0	1	0	0	0	0	0	0	0	0	0	0	0	0	0	0	1	0
5	5	Laptop	Student 1	<500	Remote area	Swedish	Collaborative	Consumption	Video rec.	5	Students are delimited by the classroomscreen.se hourglass projected on the board via the projector .	0	1	0	0	0	1	1	1	0	0	0	0	0	1	1	0	0	0	0	0	0	0	0	0	1	0	0	0	0	0	1	0	0	0	0	0	0	0
6	6	Laptop	Student 1	<500	Remote area	Swedish	Collaborative	Consumption	Video rec.	6	Students hear a sound when the time has passed.	0	0	0	0	0	0	0	0	0	0	0	0	0	0	0	0	1	0	0	0	0	0	0	0	0	0	0	0	0	0	1	0	0	0	0	0	0	1
7	7	Laptop	Student 1	<500	Remote area	Swedish	Individual	Production	Video rec.	7	The students get a new assignment where they have to focus on writing descriptions of the main characters room in the book.	0	0	1	0	0	0	0	1	0	0	0	1	0	0	0	0	0	0	0	0	0	1	0	0	0	0	0	0	0	0	0	0	0	0	0	0	1	0
8	8	Laptop	Student 1	<500	Remote area	Swedish	Individual	Consumption	Video rec.	8	Teacher reads out loud again. Students are quiet and listen .	0	0	0	0	0	0	0	1	0	1	0	0	0	0	0	0	0	0	0	0	0	0	0	0	0	0	0	0	0	0	0	0	0	0	0	0	1	0
9	9	Laptop	Student 1	<500	Remote area	Swedish	Individual	Production	Video rec.	9	One student from each learning group should pick up their Laptop .	0	0	0	0	0	0	0	0	0	0	0	0	0	0	0	1	0	0	0	0	0	0	0	0	0	0	0	0	0	0	0	0	0	0	0	0	1	0
10	10	Laptop	Student 1	<500	Remote area	Swedish	Individual	Consumption	Video rec.	10	The teacher shares a Google document with the student via Gmail .	0	0	0	0	0	0	1	1	0	0	0	0	0	0	0	0	1	0	0	0	0	0	0	0	0	1	0	0	0	0	1	0	0	0	0	0	0	0
11	11	Laptop	Student 1	<500	Remote area	Swedish	Individual	Production	Video rec.	11	They get to be the secretary of the group .	0	0	0	0	0	0	0	0	0	0	0	0	0	0	0	0	0	0	0	0	0	0	0	0	0	0	0	0	0	0	0	0	0	0	0	0	1	0
12	12	Laptop	Student 1	<500	Remote area	Swedish	Individual	Production	Video rec.	12	The student takes the Laptop , opens the monitor and press the on button and waits.	1	0	0	1	0	1	0	0	0	0	0	0	0	0	1	1	1	0	0	0	0	0	0	0	1	0	0	0	0	0	0	0	0	0	0	0	0	0
13	13	Laptop	Student 1	<500	Remote area	Swedish	Individual	Consumption	Video rec.	13	Teacher instructs that the student will receive the Google document via Gmail on their Laptops .	0	0	0	0	0	0	1	1	0	0	0	0	0	0	0	1	1	0	0	0	0	0	0	0	0	1	0	0	0	0	1	0	0	0	0	0	1	0
14	14	Laptop	Student 1	<500	Remote area	Swedish	Individual	Production	Video rec.	14	The student navigates with the mouse pad while she waits.	0	0	0	1	0	0	0	0	0	0	0	0	0	0	1	0	1	0	0	0	0	0	0	0	0	0	0	0	0	0	0	0	0	1	0	0	0	0
15	15	Laptop	Student 1	<500	Remote area	Swedish	Individual	Production	Video rec.	15	The student types passcode on Laptop's k-board on the password line and press enter tangent to confirm action.	0	0	0	1	0	0	0	0	0	0	0	0	0	0	1	1	1	0	0	0	0	1	1	0	1	0	0	0	0	0	0	0	0	1	0	0	0	1
16	16	Laptop	Student 1	<500	Remote area	Swedish	Individual	Production	Video rec.	16	Student stir cursor via fingers on the Laptops mouse pad .	0	0	0	1	0	0	0	0	0	0	0	0	0	1	1	1	1	0	0	0	0	0	0	0	1	0	0	0	0	0	0	0	0	1	0	0	0	0
17	17	Laptop	Student 1	<500	Remote area	Swedish	Individual	Production	Video rec.	17	The student clicks on a window tab to access a new window tab in the Chrome browser .	0	0	0	1	1	0	1	0	0	0	0	0	0	1	1	1	1	0	0	0	1	0	0	0	1	0	0	0	0	0	0	0	0	1	0	0	0	0
18	18	Laptop	Student 1	<500	Remote area	Swedish	Individual	Consumption	Video rec.	18	Chrome browser appears automatically.	0	0	0	0	0	0	1	0	0	0	0	0	0	0	0	0	0	0	0	0	1	0	0	0	0	0	0	0	0	0	0	0	0	0	0	0	0	0
19	19	Laptop	Student 1	<500	Remote area	Swedish	Individual	Production	Video rec.	19	Student access Google apps by clicking on the dotted button .	1	0	0	1	0	0	1	0	0	0	0	0	0	1	1	0	1	0	0	0	0	0	0	0	1	1	0	0	0	0	1	0	0	1	0	0	0	0
20	20	Laptop	Student 1	<500	Remote area	Swedish	Individual	Production	Video rec.	20	By hovering on the apps icons in Google apps with the mouse pad and cursor and the Gmail gets defined .	1	0	0	0	0	0	1	0	0	0	0	0	0	1	1	0	1	0	0	0	0	0	0	0	1	1	0	0	0	0	1	0	0	1	0	0	0	0
21	21	Laptop	Student 1	<500	Remote area	Swedish	Individual	Production	Video rec.	21	The student access Gmail by clicking .	0	0	0	1	0	0	1	0	0	0	0	0	0	0	0	0	1	0	0	0	0	0	0	0	0	1	0	0	0	0	0	0	0	0	0	0	0	0
22	22	Laptop	Student 1	<500	Remote area	Swedish	Collaborative	Production	Video rec.	22	Student talks to a classmate to question if the Google document was shared on Gmail .	0	0	1	0	0	0	1	1	0	0	1	1	0	0	0	0	1	0	0	0	0	1	0	0	0	1	0	0	0	0	1	0	0	0	0	0	1	0
23	23	Laptop	Student 1	<500	Remote area	Swedish	Individual	Production	Video rec.	23	The student scrolls up and down in the record of emails with the fingers on the mouse pad while waiting to get the email and access other inboxes .	0	0	0	1	0	0	0	0	0	0	0	0	0	0	1	0	1	0	0	1	0	0	0	0	1	0	0	0	0	1	1	0	0	1	0	0	0	0
24	24	Laptop	Student 1	<500	Remote area	Swedish	Individual	Production	Video rec.	24	Student uses the quest box at the top of the monitor to type the teacher name in order to seek for the email the teacher just sent.	0	0	0	1	0	1	0	0	0	0	0	0	0	0	1	0	1	0	0	0	0	1	1	0	1	0	0	0	0	1	1	0	0	0	0	0	0	0
25	25	Laptop	Student 1	<500	Remote area	Swedish	Individual	Consumption	Video rec.	25	The student discovers the email and clicks on the link .	0	0	0	1	0	0	1	0	0	0	0	0	0	0	1	0	1	0	0	0	1	0	0	0	1	0	0	0	0	1	1	0	0	0	0	0	0	0
26	26	Laptop	Student 1	<500	Remote area	Swedish	Individual	Production	Video rec.	26	The student access and then directs to the document link in the email to access the website .	0	0	0	1	0	0	1	0	0	0	0	0	0	0	1	0	1	0	0	0	1	0	0	0	1	0	0	0	0	1	1	0	0	0	0	0	0	0
27	27	Laptop	Student 1	<500	Remote area	Swedish	Individual	Production	Video rec.	27	The student listens to the teacher giving instructions and meanwhile scrolls with fingers on the mouse pad up and down in the Google document .	0	0	0	0	0	0	1	1	0	1	0	0	0	0	1	0	1	0	0	0	0	0	0	0	0	1	0	0	0	0	1	0	0	1	0	0	1	0
28	28	Laptop	Student 1	<500	Remote area	Swedish	Individual	Consumption	Video rec.	28	The Google document contains headlines for the different groups in different colors .	0	0	0	0	0	0	1	0	0	0	0	0	0	0	0	0	0	0	0	0	0	0	0	0	0	1	0	0	0	0	0	0	0	0	0	0	1	1
29	29	Laptop	Student 1	<500	Remote area	Swedish	Collaborative	Production	Video rec.	29	The assignment is about creating a joint text that describes the room while discussing the description .	0	0	1	0	0	0	0	1	0	0	0	1	0	0	0	0	0	0	0	0	0	1	0	0	0	0	0	0	0	0	0	0	0	0	0	0	1	0
30	30	Laptop	Student 1	<500	Remote area	Swedish	Collaborative	Production	Video rec.	30	The secretary [the student] is responsible for writing the text on behalf of the group .	0	0	1	0	0	0	0	0	0	0	0	1	0	0	0	0	0	0	0	0	0	1	0	0	0	0	0	0	0	0	0	0	0	0	0	0	1	0
31	31	Laptop	Student 1	<500	Remote area	Swedish	Collaborative	Consumption	Video rec.	31	Delimited in time by the digital hourglass on classroomscreen.se .	0	1	0	0	0	0	1	1	0	0	0	0	0	1	1	0	1	0	0	0	0	0	0	0	1	0	0	0	0	0	1	0	0	0	0	0	0	0
32	32	Laptop	Student 1	<500	Remote area	Swedish	Collaborative	Production	Video rec.	32	The students got 10 minutes to summarize the description of the room in writing .	0	0	1	0	0	0	0	0	0	0	0	1	0	0	0	0	0	0	0	0	0	1	0	0	0	0	0	0	0	0	0	0	0	0	0	0	0	0
33	33	Laptop	Student 1	<500	Remote area	Swedish	Collaborative	Production	Video rec.	33	The group work starts and discussion .	0	0	0	0	0	0	0	0	0	0	0	0	0	0	0	0	0	0	0	0	0	1	0	0	0	0	0	0	0	0	0	0	0	0	0	0	1	0
34	34	Laptop	Student 1	<500	Remote area	Swedish	Collaborative	Production	Video rec.	34	The secretary starts to write .	0	0	1	0	0	0	0	0	0	0	0	1	0	0	0	0	0	0	0	0	0	1	0	0	0	0	0	0	0	0	0	0	0	0	0	0	0	0
35	35	Laptop	Student 1	<500	Remote area	Swedish	Collaborative	Production	Video rec.	35	The student uses the k-board to write text .	0	0	1	0	0	0	0	0	0	0	0	1	0	0	1	0	1	0	0	0	0	1	0	0	0	0	0	0	0	0	0	0	0	1	0	0	0	0
36	36	Laptop	Student 1	<500	Remote area	Swedish	Collaborative	Production	Video rec.	36	The student navigates in the document with the fingers on the mouse pad .	0	0	0	1	0	0	0	0	0	0	0	0	0	0	1	0	1	0	0	0	0	0	0	0	0	0	0	0	0	0	0	0	0	1	0	0	0	0
37	37	Laptop	Student 1	<500	Remote area	Swedish	Collaborative	Production	Video rec.	37	The student makes space with the enter tangent to make distance between the sections .	0	0	0	0	0	0	0	0	0	0	0	0	0	0	1	0	1	0	0	0	0	1	0	1	0	0	0	0	0	0	0	0	0	1	0	0	0	1
38	38	Laptop	Student 1	<500	Remote area	Swedish	Collaborative	Production	Video rec.	38	Other student points at the monitor at something.	0	0	0	0	0	1	0	0	0	0	0	0	0	0	0	0	0	0	0	0	0	0	0	0	0	0	0	0	0	0	0	0	0	0	0	0	0	0
39	39	Laptop	Student 1	<500	Remote area	Swedish	Collaborative	Production	Video rec.	39	The student directs the slide bar at the lower part of the monitor with mouse pad to direct the gaze at what the other student means.	1	0	0	0	0	1	0	0	0	0	0	1	0	0	1	0	1	0	0	0	0	0	0	0	1	0	0	0	1	0	1	0	0	1	0	0	0	0
40	40	Laptop	Student 1	<500	Remote area	Swedish	Collaborative	Production	Video rec.	40	The student discuss with the group and reads the text that is displayed from the monitor out loud.	0	0	1	0	0	1	0	1	0	1	0	1	0	0	0	0	1	0	0	0	0	1	0	0	0	0	0	0	0	0	1	0	0	0	0	0	1	0
41	41	Laptop	Student 1	<500	Remote area	Swedish	Collaborative	Production	Video rec.	41	She directs her gaze at the other students and the text on the monitor .	0	0	1	0	0	1	0	0	0	0	0	1	0	0	0	0	1	0	0	0	0	0	0	0	0	0	0	0	1	0	1	0	0	0	0	0	0	0
42	42	Laptop	Student 1	<500	Remote area	Swedish	Collaborative	Consumption	Video rec.	42	There is a sound from the digital hourglass on the Classroomscreen.se .	0	1	0	0	0	0	1	0	0	0	0	0	0	1	1	0	0	0	0	0	0	0	0	0	1	0	0	0	0	0	0	0	0	0	0	0	0	1
43	43	Laptop	Student 1	<500	Remote area	Geography	Individual	Consumption	Video rec.	43	Teacher explains words and student raise their hands inquire questions .	0	0	0	0	0	0	0	1	0	0	1	1	0	0	0	0	0	0	0	0	0	1	0	0	0	0	0	0	1	0	0	0	0	0	0	0	1	0
44	44	Laptop	Student 1	<500	Remote area	Geography	Individual	Consumption	Video rec.	44	Geography lesson and how mountains arise on the face of the earth.	0	0	0	0	0	0	0	0	0	0	0	0	1	0	0	0	0	0	0	0	0	0	0	0	0	0	1	0	0	0	0	0	0	0	0	0	1	0
45	45	Laptop	Student 1	<500	Remote area	Geography	Individual	Consumption	Video rec.	45	The students get to watch a movie projected on the board by a projector .	0	0	0	0	0	1	1	1	0	1	0	0	0	0	0	0	0	1	0	0	0	0	0	0	0	0	0	0	0	0	0	0	0	0	0	0	1	0
46	46	Laptop	Student 1	<500	Remote area	Geography	Individual	consumption	Video rec.	46	Widgit online pictures are projected to the class via the projector in explanations around phenomena and words connected to Geography and mountains .	0	0	0	0	0	1	1	1	0	0	0	0	1	0	0	0	1	1	0	0	0	0	0	0	0	0	1	0	0	0	0	0	0	0	0	0	1	1
47	47	Laptop	Student 1	<500	Remote area	Geography	Individual	Production	Video rec.	47	Students get to raise their hands and when they get to talk .	0	0	1	0	0	0	0	0	0	0	1	1	0	0	0	0	0	0	0	0	0	1	0	0	0	0	0	0	1	0	0	0	0	0	0	0	0	0
48	48	Laptop	Student 1	<500	Remote area	Geography	Individual	Production	Video rec.	48	They talk to answer and inquire questions while the teacher explains .	0	0	1	0	0	0	0	1	0	0	1	1	0	0	0	0	0	0	0	0	0	1	0	0	0	0	0	0	0	0	0	0	0	0	0	0	1	0
49	49	Laptop	Student 1	<500	Remote area	Geography	Individual	Consumption	Video rec.	49	The students get to watch a movie on mountains .	0	0	0	0	0	0	1	1	0	1	0	0	1	0	0	0	0	1	0	0	0	0	0	0	0	0	1	0	0	0	0	0	0	0	0	0	1	0
50	50	Laptop	Student 1	<500	Remote area	Geography	Individual	Consumption	Video rec.	50	The students are instructed to take their analogue geography books and their Laptop .	0	0	0	0	0	0	0	1	0	0	0	0	1	0	0	1	0	0	0	0	0	0	0	0	0	0	1	0	0	0	0	0	0	0	0	0	1	0
51	51	Laptop	Student 1	<500	Remote area	Geography	Individual	Consumption	Video rec.	51	The focus of the lesson is Europe mountains .	0	0	0	0	0	0	0	0	0	0	0	0	1	0	0	0	0	0	0	0	0	0	0	0	0	0	1	0	0	0	0	0	0	0	0	0	1	0
52	52	Laptop	Student 1	<500	Remote area	Geography	Individual	Production	Video rec.	52	The student starts the laptop by raising the monitor .	0	0	0	0	0	1	0	0	0	0	0	0	0	0	0	1	0	0	0	0	0	0	0	0	0	0	0	0	0	0	0	0	0	0	0	0	0	0
53	53	Laptop	Student 1	<500	Remote area	Geography	Individual	Consumption	Video rec.	53	The student starts to stir the fingers on the mouse pad .	0	0	0	1	0	0	0	0	0	0	0	0	0	0	1	0	1	0	0	0	0	0	0	0	0	0	0	0	0	0	0	0	0	1	0	0	0	0
54	54	Laptop	Student 1	<500	Remote area	Geography	Individual	Production	Video rec.	54	Student clicks down previous assignment , a Google document .	0	0	0	1	0	0	1	1	0	0	0	0	0	0	0	0	1	0	0	0	0	1	0	0	1	1	0	0	0	0	0	0	0	0	0	0	1	0
55	55	Laptop	Student 1	<500	Remote area	Geography	Individual	Production	Video rec.	55	The student access the Google classroom via the Google Chrome start page and the dotted button Google apps .	1	0	0	1	1	0	1	0	0	0	0	0	0	0	1	0	1	0	0	0	1	0	0	0	1	0	0	0	0	0	0	0	0	0	0	0	0	0
56	56	Laptop	Student 1	<500	Remote area	Geography	Individual	Production	Video rec.	56	The student navigates with the mouse pad and fingers and stir the cursor and clicks .	0	0	0	1	0	0	0	0	0	0	0	0	0	1	1	0	1	0	0	0	0	0	0	0	1	0	0	0	0	0	0	0	0	1	0	0	0	0
57	57	Laptop	Student 1	<500	Remote area	Geography	Individual	Production	Video rec.	57	In Google classroom the student navigates to the Geography classroom and clicks the classroom designation badge .	0	0	0	1	1	0	1	0	0	0	0	0	1	0	1	0	1	0	0	0	0	0	0	0	1	0	1	0	0	0	0	0	0	0	0	0	1	0
58	58	Laptop	Student 1	<500	Remote area	Geography	Individual	Production	Video rec.	58	The student scrolls the website with the mouse pad .	0	0	0	1	0	0	1	0	0	0	0	0	0	0	1	0	1	0	0	0	1	0	0	0	0	0	0	0	0	0	1	0	0	1	0	0	0	0
59	59	Laptop	Student 1	<500	Remote area	Geography	Individual	Production	Video rec.	59	The student fingers and clicks on the right link on the Google classroom to access the assignment .	0	0	0	1	0	0	1	1	0	0	0	0	0	0	1	0	1	0	0	0	0	1	0	0	1	0	0	0	0	1	0	0	0	0	0	0	1	0
60	60	Laptop	Student 1	<500	Remote area	Geography	Individual	Consumption	Video rec.	60	The student reads from what is displayed from the monitor .	0	0	0	0	0	1	0	1	0	1	0	0	0	0	0	0	1	0	0	0	0	0	0	0	0	0	0	0	0	0	1	0	0	0	0	0	1	0
61	61	Laptop	Student 1	<500	Remote area	Geography	Individual	Production	Video rec.	61	In the assignment the student directs to and clicks the link to the Seterra.com .	0	0	0	1	0	0	1	1	0	0	0	0	0	0	1	0	1	1	0	0	0	1	0	0	1	0	0	0	0	1	1	0	0	0	0	0	1	0
62	62	Laptop	Student 1	<500	Remote area	Geography	Individual	Production	Video rec.	62	The student adjust the light by the light button on the monitor .	1	0	0	0	0	1	0	0	0	0	0	0	0	0	1	0	1	0	0	0	0	0	0	0	1	0	0	0	0	0	1	0	0	0	0	0	0	1
63	63	Laptop	Student 1	<500	Remote area	Geography	Individual	Production	Video rec.	63	The student interacts with slide bar that indicates the brightness on the monitor .	1	0	0	0	0	1	0	0	0	0	0	0	0	0	1	0	0	0	0	0	0	0	0	0	1	0	0	0	0	0	0	0	0	0	0	0	0	1
64	64	Laptop	Student 1	<500	Remote area	Geography	Individual	Production	Video rec.	64	The student directs to Seterra.com by clicking the link in Google classroom .	0	0	0	1	0	0	1	0	0	0	0	0	0	0	1	0	1	1	0	0	0	0	0	0	1	0	0	0	0	1	1	0	0	0	0	0	0	0
65	65	Laptop	Student 1	<500	Remote area	Geography	Individual	Production	Video rec.	65	The student scrolls with the fingers on the mouse pad .	0	0	0	0	0	0	0	0	0	0	0	0	0	0	1	0	1	0	0	0	0	0	0	0	0	0	0	0	0	0	1	0	0	1	0	0	0	0
66	66	Laptop	Student 1	<500	Remote area	Geography	Individual	Production	Video rec.	66	The student navigates to the map over Europe and by hoovering over the map the different countries of Europe names are appearing.	0	0	0	1	0	0	0	0	0	0	0	0	1	0	0	0	1	0	0	0	0	0	0	0	0	0	1	0	0	0	1	0	0	0	0	0	1	0
67	67	Laptop	Student 1	<500	Remote area	Geography	Individual	Production	Video rec.	67	The student clicks down the window tab with Seterra.com by using the cross symbol on the window tab in the Chrome browser .	1	0	0	1	1	0	1	0	0	0	0	0	0	0	1	0	1	1	0	0	1	0	0	0	1	0	0	0	0	0	0	0	0	0	0	0	0	0
68	68	Laptop	Student 1	<500	Remote area	Geography	Individual	Production	Video rec.	68	The students clicks on link to Seterra.com to access it.	0	0	0	1	0	0	1	0	0	0	0	0	0	0	1	0	1	1	0	0	0	0	0	0	1	0	0	0	0	1	0	0	0	0	0	0	0	0
69	69	Laptop	Student 1	<500	Remote area	Geography	Individual	Production	Video rec.	69	Student hoover over the countries of Europe to position the names with the white label that accompanies the cursor at different tags on the map .	0	0	0	0	0	0	0	0	0	0	0	0	1	1	1	0	1	0	0	0	0	0	0	0	1	0	1	0	0	0	1	0	0	0	0	0	1	1
70	70	Laptop	Student 1	<500	Remote area	Geography	Individual	Consumption	Video rec.	70	Different colors frames and guides the position of the countries of Europe in Seterra.com .	0	0	0	0	0	0	1	0	0	0	0	0	1	0	0	0	1	1	0	0	0	0	0	1	0	0	1	0	0	0	1	0	0	0	0	0	1	1
71	71	Laptop	Student 1	<500	Remote area	Geography	Individual	Consumption	Video rec.	71	The countries of Europe are in green and mountains in different shades .	0	0	0	0	0	0	0	0	0	0	0	0	1	0	0	0	0	0	0	0	0	0	0	0	0	0	1	0	0	0	0	0	0	0	0	0	1	1
72	72	Laptop	Student 1	<500	Remote area	Geography	Individual	Production	Video rec.	72	The student scrolls with the mouse pad to the top of the website .	0	0	0	0	0	0	1	0	0	0	0	0	0	0	1	0	1	0	0	0	1	0	0	0	0	0	0	0	0	0	1	0	0	1	0	0	0	0
73	73	Laptop	Student 1	<500	Remote area	Geography	Individual	Production	Video rec.	73	The student shuts the window tab by the cross symbol .	1	0	0	1	1	0	0	0	0	0	0	0	0	0	1	0	1	0	0	0	0	0	0	0	1	0	0	0	0	0	0	0	0	0	0	0	0	0
74	74	Laptop	Student 1	<500	Remote area	Geography	Individual	Production	Video rec.	74	The student directs to the Seterra.com again from the link in Google classroom by clicking it.	0	0	0	1	0	0	1	0	0	0	0	0	0	0	1	0	1	1	0	0	0	0	0	0	1	0	0	0	0	1	1	0	0	0	0	0	0	0
75	75	Laptop	Student 1	<500	Remote area	Geography	Individual	Production	Video rec.	75	The student scrolls by using the fingers on the mouse pad .	0	0	0	0	0	0	0	0	0	0	0	0	0	0	1	0	1	0	0	0	0	0	0	0	0	0	0	0	0	0	1	0	0	1	0	0	0	0
76	76	Laptop	Student 1	<500	Remote area	Geography	Individual	Production	Video rec.	76	Student hoover over the countries of Europe to position the names on the small label that accompanies the cursor at the right place on the map .	0	0	0	0	0	0	0	0	0	0	0	0	1	1	1	0	1	0	0	0	0	0	0	0	1	0	1	0	0	0	1	0	0	0	0	0	1	1
77	77	Laptop	Student 1	<500	Remote area	Geography	Individual	Production	Video rec.	77	The student press the physical off tangent and the off button with the cursor to shut down the Laptop .	1	0	0	1	0	0	0	0	0	0	0	0	0	1	1	1	1	0	0	0	0	0	0	0	1	0	0	0	0	0	0	0	0	1	0	0	0	0
78	78	Laptop	Student 1	<500	Remote area	Geography	Individual	Consumption	Interview	1	That's what happens with the laptop then, for example Seterra.com , and there you have to click .	0	0	0	1	0	0	1	0	0	0	0	0	0	0	0	1	1	1	0	0	0	0	0	0	1	0	0	0	0	0	1	0	0	0	0	0	0	0
79	79	Laptop	Student 1	<500	Remote area	Mixed subjects	Individual	Consumption	Interview	2	And then you get a result [pop-up] and how much time it took.	0	0	0	0	1	0	0	0	0	0	0	0	0	0	1	0	1	0	0	0	0	0	0	0	1	0	0	0	0	0	1	0	0	0	0	0	0	0
80	80	Laptop	Student 1	<500	Remote area	Mixed subjects	Individual	Consumption	Interview	3	It's pretty good that way and then you can practice in the book as well.	0	0	0	0	0	0	0	1	0	1	0	0	0	0	0	0	0	0	0	0	0	1	0	0	0	0	0	0	0	0	0	0	0	0	0	0	1	0
81	81	Laptop	Student 1	<500	Remote area	Mixed subjects	Collaborative	Production	Interview	4	In Swedish you would discuss and writing a text and it is quite good in the [Google] classroom .	0	0	1	0	0	0	1	0	0	0	0	1	0	0	0	0	1	0	1	0	0	1	0	0	0	0	1	0	0	0	0	1	0	0	0	0	1	0
82	82	Laptop	Student 1	<500	Remote area	Mixed subjects	Collaborative	Production	Interview	5	Because then you can submit and share and so in case you need or so.	0	0	0	0	0	0	0	0	0	0	0	0	0	0	0	0	1	0	0	0	0	0	0	0	0	0	0	0	0	0	1	0	0	0	0	0	0	0
83	83	Laptop	Student 1	<500	Remote area	Mixed subjects	Collaborative	Consumption	Interview	6	A button that you press to submit and then you cannot adjust what you have submitted .	1	0	0	1	0	0	0	0	0	0	0	0	0	0	1	0	1	0	0	0	0	0	0	0	1	0	0	0	0	0	1	0	0	0	0	0	0	0
84	84	Laptop	Student 1	<500	Remote area	Mixed subjects	Collaborative	Production	Interview	7	So that the teacher can view and so on. It is good.	0	0	0	0	0	0	0	0	0	0	0	0	0	0	0	0	1	0	0	0	0	0	0	0	0	0	0	0	0	0	1	0	0	0	0	0	0	0
85	85	Laptop	Student 1	<500	Remote area	Mixed subjects	Collaborative	Production	Interview	8	I can make a little difference or so. Because, for example, if a classmate needs help, he can take part in my work and I can tell him what I have written and a bit like that.	0	0	1	0	0	0	0	0	0	0	0	1	0	0	0	0	0	0	0	0	0	1	0	0	0	0	0	0	0	0	0	0	0	0	0	0	1	0
86	86	Laptop	Student 1	<500	Remote area	Mixed subjects	Individual	Production	Interview	9	The teacher wonder what we think is best like, paper or on Seterra.com .	0	0	0	0	0	0	1	0	0	0	0	0	0	0	0	0	0	1	0	0	0	0	0	0	0	0	0	0	0	0	0	0	0	0	0	0	0	0
87	87	Laptop	Student 1	<500	Remote area	Mixed subjects	Individual	Production	Interview	10	And then he can put it in the exercise and so for example that you can practice on a piece of paper and on Seterra.com or so.	0	0	0	0	0	0	1	1	0	1	0	0	0	0	0	0	0	1	0	0	0	1	0	0	0	0	0	0	0	0	0	0	0	0	0	0	1	0
88	88	Laptop	Student 1	<500	Remote area	Mixed subjects	Individual	Consumption	Interview	11	That's good. You understand what to do and it is good what the teacher says [instructs] what you should do.	0	0	0	0	0	0	0	1	0	0	0	0	0	0	0	0	0	0	0	0	0	0	0	0	0	0	0	0	0	0	0	0	0	0	0	0	1	0
89	89	Laptop	Student 1	<500	Remote area	Mixed subjects	Individual	Consumption	Interview	12	As for example in Seterra.com - it can be easier to do it in the laptop because then you see [display] more than in the book.	0	0	0	0	0	0	1	1	0	0	0	0	0	0	0	1	1	1	0	0	0	0	0	0	0	0	0	0	0	0	1	0	0	0	0	0	0	0
90	90	Laptop	Student 1	<500	Remote area	Mixed subjects	Individual	Consumption	Interview	13	It has visibility and there are such stripes and so are the names.	0	0	0	0	0	0	0	0	0	0	0	0	0	0	0	0	0	0	0	0	0	0	0	0	0	0	0	0	0	0	0	0	0	0	0	0	0	1
91	91	Laptop	Student 1	<500	Remote area	Mixed subjects	Individual	Consumption	Interview	14	And in the book it's just colors .	0	0	0	0	0	0	0	0	0	0	0	0	0	0	0	0	0	0	0	0	0	0	0	0	0	0	0	0	0	0	0	0	0	0	0	0	0	1
92	92	Laptop	Student 1	<500	Remote area	Mixed subjects	Individual	Consumption	Interview	15	And a little darker nuance where the mountains are and stripes on what they are called.	0	0	0	0	0	0	0	0	0	0	0	0	1	0	0	0	0	0	0	0	0	0	0	0	0	0	1	0	0	0	0	0	0	0	0	0	1	1
93	93	Laptop	Student 1	<500	Remote area	Mixed subjects	Individual	Production	Interview	16	It would have been a little easier with a mouse because on my laptop at the home, I am very good with the Hmouse .	0	0	0	0	0	1	0	0	0	0	0	0	0	0	0	1	0	0	0	0	0	0	0	0	0	0	0	0	0	0	0	0	0	0	0	0	0	0
94	94	Laptop	Student 1	<500	Remote area	Mixed subjects	Individual	Production	Interview	17	I cannot even run with that on my laptop.	0	0	0	0	0	0	0	0	0	0	0	0	0	0	0	1	0	0	0	0	0	0	0	0	0	0	0	0	0	0	0	0	0	0	0	0	0	0
95	95	Laptop	Student 1	<500	Remote area	Mixed subjects	Individual	Production	Interview	18	It would have been a little easier and faster with the Hmouse .	0	0	0	0	0	1	0	0	0	0	0	0	0	0	0	0	0	0	0	0	0	0	0	0	0	0	0	0	0	0	0	0	0	0	0	0	0	0
96	96	Laptop	Student 1	<500	Remote area	Mixed subjects	Individual	Consumption	Interview	19	And only then would there have been a movie on studi.se , it is also an app you can watch movies and do quizzes .	0	1	0	0	0	0	1	1	0	1	0	0	0	0	0	0	0	1	0	0	0	0	0	0	0	0	0	0	0	0	0	0	0	0	0	0	1	0
97	97	Laptop	Student 1	<500	Remote area	Mixed subjects	Individual	Consumption	Interview	20	Mmm, yes they are kind in all subjects .	0	0	0	0	0	0	0	0	0	0	0	0	0	0	0	0	0	0	0	0	0	0	0	0	0	0	1	0	0	0	0	0	0	0	0	0	1	0
98	98	Laptop	Student 1	<500	Remote area	Mixed subjects	Individual	Production	Interview	21	Mmm, so it's just right .. so a little more because I like working with the laptop and so on.	0	0	0	0	0	0	0	0	0	0	0	0	0	0	0	1	0	0	0	0	0	0	0	0	0	0	0	0	0	0	0	0	0	0	0	0	0	0
99	99	Laptop	Student 1	<500	Remote area	Mixed subjects	Collaborative	Consumption	Interview	22	But it's good the approach the teacher makes and so on.	0	0	0	0	0	0	0	0	0	0	0	0	0	0	0	0	0	0	0	0	0	0	0	0	0	0	0	0	0	0	0	0	0	0	0	0	0	0
100	100	Laptop	Student 1	<500	Remote area	Mixed subjects	Individual	Consumption	Interview	23	I might have wanted to go to studi.se and watch a movie and run a quiz and then maybe there are some good videoclips on Youtube as well.	0	1	0	0	0	0	1	1	0	1	0	0	0	0	0	0	0	1	0	0	0	0	0	0	0	0	0	0	0	0	0	0	0	0	0	0	1	0
101	101	Laptop	Student 1	<500	Remote area	Mixed subjects	Individual	Production	Interview	24	Mmm... That was probably what I got to do, it was quite fun to do it.	0	0	0	0	0	0	0	0	0	0	0	0	0	0	0	0	0	0	0	0	0	0	0	0	0	0	0	0	0	0	0	0	0	0	0	0	0	0
102	102	Laptop	Student 1	<500	Remote area	Mixed subjects	Individual	Production	Interview	25	For example, I control the cursor , then it is the laptop itself that controls with a lot of zeros and ones.	0	0	0	1	0	0	0	0	0	0	0	0	0	1	1	1	1	0	0	0	0	0	0	0	1	0	0	0	0	0	0	0	0	0	0	0	0	0
103	103	Laptop	Student 1	<500	Remote area	Mixed subjects	Individual	Production	Interview	26	For example like Seterra.com who was in English first and then you can change to Swedish .	0	0	0	0	0	0	1	0	0	0	0	0	0	0	0	0	0	1	1	0	0	0	0	0	0	0	1	0	0	0	0	1	0	0	0	0	1	0
104	104	Laptop	Student 1	<500	Remote area	Mixed subjects	Individual	Production	Interview	27	And then a map name came (pop-up) and then I can position in where the right name should be and so on.	0	1	0	0	1	0	1	0	0	0	0	0	1	0	1	0	1	0	0	0	0	0	0	0	1	0	1	0	0	0	1	0	0	0	0	0	1	0
105	105	Laptop	Student 1	<500	Remote area	Mixed subjects	Individual	Production	Interview	28	I might have wanted to go to studi.se and watch a movie and run a quiz and then maybe there are some good videoclips on Youtube as well.	0	1	0	0	0	0	1	1	0	1	0	0	0	0	0	0	0	1	0	0	0	0	0	0	0	0	0	0	0	0	0	0	0	0	0	0	1	0
106	106	Laptop	Student 1	<500	Remote area	Mixed subjects	Individual	Production	Interview	29	Mmm... That was probably what I got to do, it was quite fun to do it.	0	0	0	0	0	0	0	0	0	0	0	0	0	0	0	0	0	0	0	0	0	0	0	0	0	0	0	0	0	0	0	0	0	0	0	0	0	0
107	107	Laptop	Student 1	<500	Remote area	Mixed subjects	Individual	Production	Interview	30	For example, I control the cursor then it is the laptop itself that controls with a lot of zeros and ones.	0	0	0	1	0	0	0	0	0	0	0	0	0	1	1	1	1	0	0	0	0	0	0	0	1	0	0	0	0	0	0	0	0	0	0	0	0	0
108	108	Laptop	Student 1	<500	Remote area	Mixed subjects	Individual	Consumption	Interview	31	For example like Seterra.com who was in Engl. first and then you can change to Swed.	0	0	0	0	0	0	1	0	0	0	0	0	0	0	0	0	0	1	0	0	0	0	0	0	0	0	0	0	0	0	0	0	0	0	0	0	0	0
109	109	Laptop	Student 1	<500	Remote area	Mixed subjects	Individual	Consumption	Interview	32	And then a map name came up and then I can press in where the right thing should be and so on.	0	0	0	1	0	0	0	0	0	0	0	0	1	0	0	0	1	0	0	0	0	0	0	0	0	0	1	0	0	0	0	0	0	0	0	0	1	0
110	110	Laptop	Student 1	<500	Remote area	Mixed subjects	Individual	Production	Interview	33	Here [on the mouse pad] you have to lift and with that [mouse] you can just sit like this [stir your hand like it was the Hmouse] .	0	0	0	1	0	1	0	0	0	0	0	0	0	0	1	0	1	0	0	0	0	0	0	0	0	0	0	0	0	0	0	0	0	1	0	0	0	0
111	111	Laptop	Student 1	<500	Remote area	Mixed subjects	Individual	Production	Interview	34	Because I am very used to it... mmm... and so it is with Hmouse then...	0	0	0	0	0	1	0	0	0	0	0	0	0	0	0	0	0	0	0	0	0	0	0	0	0	0	0	0	0	0	0	0	0	0	0	0	0	0
112	112	Laptop	Student 1	<500	Remote area	Mixed subjects	Individual	Production	Interview	35	it's a little easier because you can scroll out on it and click	0	0	0	1	0	0	0	0	0	0	0	0	0	0	0	0	1	0	0	0	0	0	0	0	0	0	0	0	0	0	1	0	0	0	0	0	0	0
113	113	Laptop	Student 1	<500	Remote area	Mixed subjects	Individual	Production	Interview	36	I do not use my tablet that much, it is mostly the laptop and smartphone .	0	0	0	0	0	0	0	0	1	0	0	0	0	0	0	1	0	0	0	0	0	0	0	0	0	0	0	0	0	0	0	0	0	0	0	1	0	0
114	114	Laptop	Student 1	<500	Remote area	Mixed subjects	Individual	Consumption	Interview	37	But I like the sound when typing on laptops - it is calming or something like that.	0	0	0	0	0	0	0	0	0	0	0	0	0	0	0	1	0	0	0	0	0	0	0	0	0	0	0	0	0	0	0	0	0	0	0	0	0	1
115	115	Laptop	Student 1	<500	Remote area	Mixed subjects	Individual	Production	Interview	38	Emmm... and there is like you have to do everything with the finger I like when you can use a Hmouse or a touc-pen .	0	0	0	0	0	1	0	0	0	0	0	0	0	0	0	0	0	0	0	0	0	0	0	0	0	0	0	0	0	0	0	0	0	0	0	0	0	0
116	116	Laptop	Student 1	<500	Remote area	Mixed subjects	Individual	Production	Interview	39	Yes, because I know where all the letter tangent are like, I can just go in ..	0	0	0	0	0	0	0	0	0	0	0	0	0	0	1	0	0	0	0	0	0	0	0	0	0	0	0	0	0	0	0	0	0	1	0	0	0	0
117	117	Laptop	Student 1	<500	Remote area	Mixed subjects	Individual	Consumption	Interview	40	But tablets are a little bigger so you have to like..mmm [holds up his arms as if he was holding a tablet and types with his thumbs on letter tangent .	0	0	0	0	0	0	0	0	1	0	0	0	0	0	1	0	0	0	0	0	0	0	0	0	0	0	0	0	0	0	0	0	0	1	0	0	0	1
118	118	Laptop	Student 1	<500	Remote area	Mixed subjects	Individual	Consumption	Interview	41	Same as with a smartphone you know where every [letter tangent] is.	0	0	0	0	0	0	0	0	0	0	0	0	0	0	1	0	0	0	0	0	0	0	0	0	0	0	0	0	0	0	0	0	0	1	0	1	0	0
119	119	Laptop	Student 1	<500	Remote area	Mixed subjects	Individual	Consumption	Interview	42	Mmmm, maybe a bigger monitor [size] .	0	0	0	0	0	1	0	0	0	0	0	0	0	0	0	0	0	0	0	0	0	0	0	0	0	0	0	0	0	0	0	0	0	0	0	0	0	1
120	120	Laptop	Student 1	<500	Remote area	Mixed subjects	Individual	Production	Interview	43	It's a pretty small size on them [means Laptop] but you can use them but a little bigger then so you distinguish a little more	0	0	0	0	0	0	0	0	0	0	0	0	0	0	0	1	1	0	0	0	0	0	0	1	0	0	0	0	0	0	0	0	0	0	0	0	0	1
121	121	Laptop	Student 1	<500	Remote area	Mixed subjects	Individual	Consumption	Interview	44	And then so, on the headphones , that leather that is sitting around, it might be good to have in a different material.	0	0	0	0	0	1	0	0	0	0	0	0	0	0	0	0	0	0	0	0	0	0	0	0	0	0	0	0	0	0	0	0	0	0	0	0	0	0
122	122	Laptop	Student 1	<500	Remote area	Mixed subjects	Individual	Consumption	Interview	45	I: The headphones gets a little disgusting do you mean? Yes and then they make a noise pretty much when it changes a little.	0	0	0	0	0	1	0	0	0	0	0	0	0	0	0	0	0	0	0	0	0	0	0	0	0	0	0	0	0	0	0	0	0	0	0	0	0	0
123	123	Laptop	Student 1	<500	Remote area	Mixed subjects	Individual	Consumption	Interview	46	Studi.se we could have used it a little more, I think because it's like good that you can watch a movie and you can watch it again.	0	1	0	0	0	0	1	1	0	1	0	0	0	0	0	0	0	1	0	0	0	0	0	0	0	0	0	0	0	0	0	0	0	0	0	0	1	0
124	124	Laptop	Student 1	<500	Remote area	Mixed subjects	Individual	Consumption	Interview	47	And then there is also a quiz about what you have seen three categories, from a little easier to a little harder.	0	0	0	0	0	0	0	0	0	0	0	0	0	0	0	0	0	0	0	0	0	0	0	0	0	0	0	0	0	0	0	0	0	0	0	0	0	0
125	125	Laptop	Student 1	<500	Remote area	Mixed subjects	Individual	Consumption	Interview	48	There are Youtube videoclips , I learn to make claws out of paper.	0	0	0	0	0	0	1	0	0	0	0	0	0	0	0	0	0	1	0	0	0	0	0	0	0	0	0	0	0	0	0	0	0	0	0	0	0	0
126	126	Laptop	Student 1	<500	Remote area	Mixed subjects	Individual	Consumption	Interview	49	Maybe, the colors are what is a little more specific, or what to say so that you know exactly where instead of that white .	0	0	0	0	0	0	0	0	0	0	0	0	0	0	0	0	0	0	0	0	0	0	0	0	0	0	0	0	0	0	0	0	0	0	0	0	0	1
127	127	Laptop	Student 1	<500	Remote area	Mixed subjects	Individual	Consumption	Interview	50	It can be a little more shaded there so that you know [refers to the placement of mountains in Seterra.com .	0	0	0	0	0	0	1	0	0	0	0	0	1	0	0	0	0	1	0	0	0	0	0	0	0	0	1	0	0	0	0	0	0	0	0	0	1	1
128	128	Laptop	Student 1	<500	Remote area	Mixed subjects	Individual	Consumption	Interview	51	And then it's a little easier on the map too because then there's something big white there.	0	0	0	0	0	0	0	0	0	0	0	0	1	0	0	0	0	0	0	0	0	0	0	0	0	0	1	0	0	0	0	0	0	0	0	0	1	1
129	129	Laptop	Student 1	<500	Remote area	Mixed subjects	Individual	Consumption	Interview	52	And then there are the window tab there, press .	1	0	0	1	1	0	0	0	0	0	0	0	0	0	1	0	1	0	0	0	0	0	0	0	1	0	0	0	0	0	0	0	0	0	0	0	0	0
130	130	Laptop	Student 1	<500	Remote area	Mixed subjects	Individual	Consumption	Interview	53	Or they press the cross symbol that are there.	1	0	0	1	0	0	0	0	0	0	0	0	0	0	1	0	1	0	0	0	0	0	0	0	1	0	0	0	0	0	0	0	0	0	0	0	0	0
131	131	Laptop	Student 1	<500	Remote area	Mixed subjects	Individual	Consumption	Interview	54	They could have been a little bigger maybe.	0	0	0	0	0	0	0	0	0	0	0	0	0	0	0	0	0	0	0	0	0	0	0	0	0	0	0	0	0	0	0	0	0	0	0	0	0	1
132	132	Laptop	Student 1	<500	Remote area	Mixed subjects	Individual	Consumption	Interview	55	Because if I use a Hmouse and so, then I will click on the cross but then I get outside and so.	0	0	0	1	0	1	0	0	0	0	0	0	0	0	0	0	1	0	0	0	0	0	0	0	0	0	0	0	0	0	0	0	0	0	0	0	0	0
133	133	Laptop	Student 1	<500	Remote area	Mixed subjects	Individual	Consumption	Interview	56	So I click on that tab window instead.	0	0	0	1	1	0	0	0	0	0	0	0	0	0	1	0	1	0	0	0	0	0	0	0	1	0	0	0	0	0	0	0	0	0	0	0	0	0
134	134	Laptop	Student 1	<500	Remote area	Mixed subjects	Individual	Production	Interview	57	Is it both in Swedish and geography .	0	0	0	0	0	0	0	0	0	0	0	0	1	0	0	0	0	0	1	0	0	0	0	0	0	0	1	0	0	0	0	1	0	0	0	0	1	0
135	135	Laptop	Student 1	<500	Remote area	Mixed subjects	Individual	Production	Interview	58	We use Bingel.se quite often, because it is good, it is in Swedish and Math .	0	1	0	0	0	0	1	0	0	0	0	0	0	0	0	0	0	0	1	0	0	0	0	0	0	0	1	0	0	0	0	1	1	0	0	0	1	0
136	136	Laptop	Student 1	<500	Remote area	Mixed subjects	Individual	Production	Interview	59	Everyone thinks it is good because you get PP so you can buy clothes and hair and accesories.	0	0	0	0	0	0	0	0	0	0	0	0	0	0	0	0	0	0	0	0	0	0	0	0	0	0	0	0	0	0	0	0	0	0	0	0	0	0
137	137	Laptop	Student 1	<500	Remote area	Mixed subjects	Individual	Consumption	Interview	60	It's like that... We use so now in the lessons that showed the teachers quite a lot studi.se , so we also use quite a lot of it.	0	1	0	0	0	0	1	0	0	0	0	0	0	0	0	0	0	0	0	0	0	0	0	0	0	0	0	0	0	0	0	0	0	0	0	0	1	0
138	138	Laptop	Student 1	<500	Remote area	Mixed subjects	Individual	Production	Interview	61	You need a mouse pad to be able to control what you need to click on.	0	0	0	1	0	0	0	0	0	0	0	0	0	0	1	0	1	0	0	0	0	0	0	0	0	0	0	0	0	0	0	0	0	1	0	0	0	0
139	139	Laptop	Student 1	<500	Remote area	Mixed subjects	Individual	Production	Interview	62	And you have to have the k-board to be able to type , otherwise if you do not type it would have been quite difficult.	0	0	0	1	0	0	0	0	0	0	0	0	0	0	1	0	1	0	0	0	0	0	0	0	0	0	0	0	0	0	0	0	0	1	0	0	0	0
140	140	Laptop	Student 1	<500	Remote area	Mixed subjects	Individual	Production	Interview	63	I: You write a bit too but much of your technology use is about you clicking on different things.	0	0	1	1	0	1	1	0	0	0	0	1	0	0	0	0	1	0	0	0	1	1	0	0	0	0	0	0	0	0	0	0	0	0	0	0	0	0
141	141	Laptop	Student 1	<500	Remote area	Mixed subjects	Individual	Production	Interview	64	It is on certain specific tasks then.	0	0	0	0	0	0	0	1	0	0	0	0	0	0	0	0	0	0	0	0	0	1	0	0	0	0	0	0	0	0	0	0	0	0	0	0	1	0
142	142	Laptop	Student 1	<500	Remote area	Mixed subjects	Individual	Production	Interview	65	For some [lessons / topics] you need to write more and click on the k-board .	0	0	1	1	0	0	0	0	0	0	0	1	0	0	1	0	1	0	0	0	0	1	0	0	0	0	0	0	0	0	0	0	0	1	0	0	1	0
143	143	Laptop	Student 1	<500	Remote area	Mixed subjects	Individual	Production	Interview	66	But some, you click and use the mouse pad .	0	0	0	1	0	0	0	0	0	0	0	0	0	0	1	0	1	0	0	0	0	0	0	0	0	0	0	0	0	0	0	0	0	1	0	0	0	0
144	144	Laptop	Student 1	<500	Remote area	Mixed subjects	Individual	Consumption	Interview	67	Yes, for example then in the Google Classroom there are boxes [designation badges] .	0	0	0	0	0	0	1	0	0	0	0	0	0	0	1	0	0	0	0	0	0	0	1	0	1	0	0	0	0	0	0	0	0	0	0	0	0	0
145	145	Laptop	Student 1	<500	Remote area	Mixed subjects	Individual	Consumption	Interview	68	Then as it says and if it had not said anything then it would have been quite difficult to know what to go into.	0	0	0	0	0	0	0	0	0	0	0	0	0	0	0	0	0	0	0	0	0	0	0	0	0	0	0	0	0	0	0	0	0	0	0	0	0	0
146	146	Laptop	Student 1	<500	Remote area	Mixed subjects	Individual	Consumption	Interview	69	Mmm, yes, that with tasks and assignments .	0	0	0	0	0	0	0	1	0	0	0	0	0	0	0	0	0	0	0	0	0	1	0	0	0	0	0	0	0	0	0	0	0	0	0	0	1	0
147	147	Laptop	Student 1	<500	Remote area	Mixed subjects	Individual	Consumption	Interview	70	Then you access and it says the different subjects you have.	0	0	0	1	0	0	0	0	0	0	0	0	0	0	0	0	1	0	0	0	0	0	0	0	0	0	1	0	0	0	0	0	0	0	0	0	1	0
148	148	Laptop	Student 1	<500	Remote area	Mixed subjects	Individual	Consumption	Interview	71	And then there are tab windows under them so it will be easier to seek them that you should have.	0	0	0	0	1	0	0	0	0	0	0	0	0	0	1	0	1	0	0	0	0	0	0	0	1	0	0	0	0	0	1	0	0	0	0	0	0	0
149	149	Laptop	Student 1	<500	Remote area	Mixed subjects	Individual	Consumption	Interview	72	Mmmm, yes, it says differently on the boxes [designation badges] .	0	0	0	0	0	0	0	0	0	0	0	0	0	0	1	0	0	0	0	0	0	0	1	0	1	0	0	0	0	0	0	0	0	0	0	0	0	0
150	150	Laptop	Student 1	<500	Remote area	Mixed subjects	Individual	Consumption	Interview	73	And then when you access there is one that you can click on as so you see a little and can then see if it is right or wrong.	0	0	0	1	0	0	0	0	0	0	0	0	0	0	0	0	1	0	0	0	0	0	0	0	0	0	0	0	0	0	0	0	0	0	0	0	0	0
151	151	Laptop	Student 1	<500	Remote area	Mixed subjects	Individual	Consumption	Interview	74	Mmmm, I have not thought about that, but when you come in there are tab windows below and then there are pictures below.	0	0	0	0	1	0	0	0	0	0	0	0	0	0	1	0	0	0	0	0	0	0	0	0	1	0	0	0	0	0	0	0	0	0	0	0	0	1
152	152	Laptop	Student 1	<500	Remote area	Mixed subjects	Individual	Consumption	Interview	75	So, mouse pad and k-board and the programs it is important that you see what it says,	0	0	0	0	0	0	0	0	0	0	0	0	0	0	1	0	0	0	0	0	0	0	0	0	0	0	0	0	0	0	0	0	0	1	0	0	0	0
153	153	Laptop	Student 1	<500	Remote area	Mixed subjects	Individual	Consumption	Interview	76	that there are pictures and so Studi.se is also quite good because it is like pictures on videos and so on.	0	1	0	0	0	0	1	0	0	0	0	0	0	0	0	0	0	0	0	0	0	0	0	0	0	0	0	0	0	0	0	0	0	0	0	0	0	1
154	154	Laptop	Student 1	<500	Remote area	Mixed subjects	Individual	Production	Interview	77	A function that I often like is that there is a microphone there so you do not have to write .	0	0	1	0	0	0	0	0	0	0	0	1	0	0	0	0	0	0	0	0	0	1	0	0	0	0	0	0	0	0	0	0	0	0	0	0	0	0
155	155	Laptop	Student 1	<500	Remote area	Mixed subjects	Individual	Production	Interview	78	And you can only talk what you want.	0	0	1	0	0	0	0	0	0	0	1	1	0	0	0	0	0	0	0	0	0	1	0	0	0	0	0	0	0	0	0	0	0	0	0	0	0	0
156	156	Laptop	Student 1	<500	Remote area	Mixed subjects	Individual	Production	Interview	79	Because I cannot write so then you just click on it and you say.	0	0	1	1	0	0	0	0	0	0	0	1	0	0	0	0	1	0	0	0	0	1	0	0	0	0	0	0	0	0	0	0	0	0	0	0	0	0
157	157	Laptop	Student 1	<500	Remote area	Mixed subjects	Individual	Production	Interview	80	If you go in like on Google and then there is the quest box there, there is a microphone there.	0	0	0	0	0	0	1	0	0	0	0	0	0	0	1	0	0	0	0	0	0	0	1	0	1	0	0	0	0	0	0	0	0	0	0	0	0	0
158	158	Laptop	Student 1	<500	Remote area	Mixed subjects	Individual	Production	Interview	81	It's to give you a little more space to sort of write on.	0	0	1	0	0	0	0	0	0	0	0	1	0	0	0	0	1	0	0	0	0	1	0	1	0	0	0	0	0	0	0	0	0	0	0	0	0	1
159	159	Laptop	Student 1	<500	Remote area	Mixed subjects	Individual	Production	Interview	82	Or you almost never get down but it does hop down but I do it to get [enclose] more space and you don't have to be so tight .	0	0	0	0	0	0	0	0	0	0	0	0	0	0	0	0	1	0	0	0	0	0	0	1	0	0	0	0	0	0	0	0	0	0	0	0	0	1
160	160	Laptop	Student 1	<500	Remote area	Mixed subjects	Collaborative	Consumption	Interview	83	Maybe because you might not seem to mix so that you knew that this is my color .	0	0	0	0	0	0	0	0	0	0	0	0	0	0	0	0	0	0	0	0	0	0	0	0	0	0	0	0	0	0	0	0	0	0	0	0	0	1
161	161	Laptop	Student 1	<500	Remote area	Mixed subjects	Collaborative	Consumption	Interview	84	And that you then know that this is like your group because one is blue and another is pink maybe and then you see as if it were their text .	0	0	1	0	0	0	0	0	0	0	0	1	0	0	0	0	0	0	0	0	0	0	0	0	0	0	0	0	0	0	0	0	0	0	0	0	1	1
162	162	Laptop	Student 1	<500	Remote area	Mixed subjects	Individual	Consumption	Interview	85	So yes, for this with colors if you verify right or wrong.	0	0	0	0	0	0	0	0	0	0	0	0	0	0	0	0	1	0	0	0	0	0	0	0	0	0	0	0	0	0	1	0	0	0	0	0	0	1
163	163	Laptop	Student 1	<500	Remote area	Mixed subjects	Individual	Consumption	Interview	86	It can be quite good because then you know that you were wrong on it and that you need to practice more on it.	0	0	0	0	0	0	0	1	0	1	0	0	0	0	0	0	0	0	0	0	0	1	0	0	0	0	0	0	0	0	0	0	0	0	0	0	1	0
164	164	Laptop	Student 1	<500	Remote area	Mixed subjects	Individual	Consumption	Interview	87	And what comes up [pop-up] later, you can imagine I will have time for this in less time and get a higher percentage then.	0	0	0	0	1	0	0	0	0	0	0	0	0	0	1	0	1	0	0	0	0	0	0	0	1	0	0	0	0	0	1	0	0	0	0	0	0	0
165	165	Laptop	Student 1	<500	Remote area	Mixed subjects	Individual	Consumption	Interview	88	Yes, it could have been. For example, in student games where you come up when you have done a task .	0	0	0	0	0	0	0	1	0	0	0	0	0	0	0	0	0	0	0	0	0	1	0	0	0	0	0	0	0	0	0	0	0	0	0	0	1	0
166	166	Laptop	Student 1	<500	Remote area	Mixed subjects	Individual	Consumption	Interview	89	You come out of what you have done and then a [pop-up] box comes up "congratulations" you got so many right and so.	0	0	0	0	1	0	0	0	0	0	0	0	0	0	1	0	0	0	0	0	0	0	0	0	1	0	0	0	0	0	0	0	0	0	0	0	0	0
167	167	Laptop	Student 1	<500	Remote area	Mixed subjects	Individual	Consumption	Interview	90	And then when you scroll down you can see which ones were wrong in more detail.	0	0	0	0	0	0	0	0	0	0	0	0	0	0	0	0	1	0	0	0	0	0	0	0	0	0	0	0	0	0	1	0	0	0	0	0	0	0
168	168	Laptop	Student 1	<500	Remote area	Mixed subjects	Individual	Production	Interview	91	Then e.g. if we write a text then you use different concepts and so.	0	0	1	0	0	0	0	0	0	0	0	1	0	0	0	0	0	0	0	0	0	1	0	0	0	0	0	0	0	0	0	0	0	0	0	0	0	0
169	169	Laptop	Student 1	<500	Remote area	Mixed subjects	Individual	Production	Interview	92	I do not know how I came to this but there is something called app-wroter	0	0	0	0	0	0	1	0	0	0	0	0	0	0	0	0	0	0	0	0	0	0	0	0	0	1	0	0	0	0	0	0	0	0	0	0	0	0
170	170	Laptop	Student 1	<500	Remote area	Mixed subjects	Individual	Consumption	Interview	93	there may be word suggestions , it can recite word for word and sentence for sentence .	0	0	0	0	0	0	0	0	0	0	0	0	0	0	0	0	0	0	0	0	0	0	0	0	0	0	0	0	0	0	0	0	0	0	0	0	0	1
171	171	Laptop	Student 1	<500	Remote area	Mixed subjects	Individual	Production	Interview	94	For example with the technology then with my gaze ...	0	0	0	0	0	1	1	0	0	0	0	1	0	0	0	0	0	0	0	0	1	0	0	0	0	0	0	0	1	0	0	0	0	0	0	0	0	0
172	172	Laptop	Student 1	<500	Remote area	Mixed subjects	Individual	Production	Interview	95	I gaze at the monitor then, the Hmouse .	0	0	0	0	0	1	0	0	0	0	0	1	0	0	0	0	0	0	0	0	0	0	0	0	0	0	0	0	1	0	0	0	0	0	0	0	0	0
173	173	Laptop	Student 1	<500	Remote area	Mixed subjects	Individual	Production	Interview	96	I can memorize the k-board .	0	0	0	0	0	0	0	0	0	0	0	0	0	0	1	0	0	0	0	0	0	0	0	0	0	0	0	0	0	0	0	0	0	1	0	0	0	0
174	174	Laptop	Student 1	<500	Remote area	Mixed subjects	Individual	Production	Interview	97	I have to gaze at so that I press the right letter tangent	0	0	0	1	0	0	0	0	0	0	0	1	0	0	1	0	1	0	0	0	0	0	0	0	0	0	0	0	1	0	0	0	0	1	0	0	0	0
175	175	Laptop	Student 1	<500	Remote area	Mixed subjects	Individual	Production	Interview	98	But I have tried to close my eyes and write my own name but it works like that.	0	0	1	0	0	0	0	0	0	0	0	1	0	0	0	0	0	0	0	0	0	1	0	0	0	0	0	0	0	0	0	0	0	0	0	0	0	0
176	176	Laptop	Student 1	<500	Remote area	Mixed subjects	Collaborative	Production	Interview	99	But for example when I talk I can kind of give them tips.	0	0	1	0	0	0	0	0	0	0	1	1	0	0	0	0	0	0	0	0	0	1	0	0	0	0	0	0	0	0	0	0	0	0	0	0	0	0
177	177	Laptop	Student 1	<500	Remote area	Mixed subjects	Collaborative	Production	Interview	100	And they can give me tips and I can write and then I can gaze at their laptop .	0	0	1	0	0	0	0	0	0	0	0	1	0	0	0	1	0	0	0	0	0	1	0	0	0	0	0	0	1	0	0	0	0	0	0	0	0	0
178	178	Laptop	Student 1	<500	Remote area	Mixed subjects	Collaborative	Production	Interview	101	And then I can control and so and display [my monitor].	0	0	0	1	0	1	0	0	0	0	0	0	0	0	0	0	1	0	0	0	0	0	0	0	0	0	0	0	0	0	1	0	0	0	0	0	0	0
179	179	Laptop	Student 1	<500	Remote area	Mixed subjects	Individual	Consumption	Interview	102	For example in Google classroom that you had different colors on different subjects so that you did not always have to click on tasks .	0	0	0	1	0	0	1	1	0	0	0	0	0	0	0	0	1	0	0	0	0	1	0	0	0	0	1	0	0	0	0	0	0	0	0	0	1	1
180	180	Laptop	Student 1	<500	Remote area	Mixed subjects	Individual	Consumption	Interview	103	Because I mostly scroll like that for example Swedish in pink and the others in black .	0	0	0	0	0	0	0	0	0	0	0	0	0	0	0	0	1	0	0	0	0	0	0	0	0	0	0	0	0	0	1	0	0	0	0	0	0	1
181	181	Laptop	Student 1	<500	Remote area	Mixed subjects	Individual	Consumption	Interview	104	And then you know it and then you can check extra carefully what it says	0	0	0	0	0	0	0	0	0	0	0	0	0	0	0	0	0	0	0	0	0	0	0	0	0	0	0	0	0	0	0	0	0	0	0	0	0	0
182	182	Laptop	Student 1	<500	Remote area	Swedish	Individual	Consumption	Observation	1	Swedish 8:00 - 8:40	0	0	0	0	0	0	0	0	0	0	0	0	0	0	0	0	0	0	1	0	0	0	0	0	0	0	1	0	0	0	0	1	0	0	0	0	1	0
183	183	Laptop	Student 1	<500	Remote area	Swedish	Individual	Consumption	Observation	2	The Swedish lesson is introduced on the board.	0	0	0	0	0	0	0	0	0	0	0	0	0	0	0	0	0	0	1	0	0	0	0	0	0	0	1	0	0	0	0	1	0	0	0	0	1	0
184	184	Laptop	Student 1	<500	Remote area	Swedish	Individual	Production	Observation	3	The hardware Laptop laptop is used together with Google documents in Google classroom .	0	0	0	0	0	0	1	0	0	0	0	0	0	0	0	1	0	0	0	0	0	0	0	0	0	1	0	0	0	0	0	0	0	0	0	0	0	0
185	185	Laptop	Student 1	<500	Remote area	Swedish	Individual	Production	Observation	4	The students have to navigate to the Gmail to download a Google document .	0	0	0	1	0	0	1	0	0	0	0	0	0	0	0	0	1	0	0	0	0	0	0	0	0	1	0	0	0	0	0	0	0	0	0	0	0	0
186	186	Laptop	Student 1	<500	Remote area	Swedish	Collaborative	Consumption	Observation	5	The projector is turned on by the teacher, projecting an interactive clock on the board to organize students time on the laptop- based task.	0	0	0	0	0	1	0	1	0	0	0	0	0	1	1	1	0	0	0	0	0	1	0	0	1	0	0	0	0	0	1	0	0	0	0	0	1	0
187	187	Laptop	Student 1	<500	Remote area	Swedish	Collaborative	Consumption	Observation	6	Students use the gaze to direct attention at the clock .	0	0	0	0	0	0	0	0	0	0	0	1	0	1	1	0	1	0	0	0	0	0	0	0	1	0	0	0	1	0	1	0	0	0	0	0	1	0
188	188	Laptop	Student 1	<500	Remote area	Swedish	Collaborative	Consumption	Observation	7	A sound is heard when a minute has passed.	0	0	0	0	0	0	0	0	0	0	0	0	0	0	0	0	0	0	0	0	0	0	0	0	0	0	0	0	0	0	0	0	0	0	0	0	0	1
189	189	Laptop	Student 1	<500	Remote area	Swedish	Individual	Production	Observation	8	The students use the k-board to log in to the laptop and then navigate to the Gmail icon .	1	0	0	1	0	0	1	0	0	0	0	0	0	0	1	1	1	0	0	0	0	0	0	0	1	1	0	0	0	0	0	0	0	1	0	0	0	0
190	190	Laptop	Student 1	<500	Remote area	Swedish	Individual	Production	Observation	9	The students use the mouse pad a lot, and use the click and stir the cursor onto the hyperlink and retrieves the Google document .	0	0	0	1	0	0	1	0	0	0	0	0	0	1	1	0	1	0	0	0	0	0	0	0	1	1	0	0	0	0	0	0	0	1	0	0	0	0
191	191	Laptop	Student 1	<500	Remote area	Swedish	Collaborative	Production	Observation	10	The students write answers in assignment to the predefined questions .	0	0	1	0	0	0	0	1	0	0	1	1	0	0	0	0	0	0	0	0	0	1	0	0	0	0	0	0	0	0	0	0	0	0	0	0	1	0
192	192	Laptop	Student 1	<500	Remote area	Swedish	Collaborative	Production	Observation	11	The student also enclose the typographic style using the toolbar to frame and make the answers distinct from each other.	0	0	0	0	0	0	0	0	0	0	1	0	0	0	1	0	1	0	0	0	0	1	0	1	1	0	0	0	0	1	0	0	0	0	0	0	1	1
193	193	Laptop	Student 1	<500	Remote area	Swedish	Collaborative	Production	Observation	12	Yet, with proximity between question and answer , and change the size and font and font size .	0	0	0	0	0	0	0	0	0	0	1	0	0	0	0	0	0	0	0	0	0	1	0	0	0	0	0	0	0	0	0	0	0	0	0	0	1	1
194	194	Laptop	Student 1	<500	Remote area	Swedish	Collaborative	Production	Observation	13	The student uses the k-board for typing in production while listening .	0	0	0	1	0	0	0	1	0	1	0	0	0	0	1	0	1	0	0	0	0	1	0	0	0	0	0	0	0	0	0	0	0	1	0	0	1	0
195	195	Laptop	Student 1	<500	Remote area	Swedish	Collaborative	Production	Observation	14	When the student talks and tries to reason about what the others are saying.	0	0	1	0	0	0	0	0	0	0	1	1	0	0	0	0	0	0	0	0	0	1	0	0	0	0	0	0	0	0	0	0	0	0	0	0	1	0
196	196	Laptop	Student 1	<500	Remote area	Swedish	Collaborative	Production	Observation	15	The student writes at the same time and organizes the document automatically based on the division of assignments' questions .	0	0	1	0	0	0	0	1	0	0	0	1	0	0	0	0	0	0	0	0	0	1	0	0	0	0	0	0	0	0	0	0	0	0	0	0	1	0
197	197	Laptop	Student 1	<500	Remote area	Swedish	Collaborative	Production	Observation	16	The student uses different colors (by default the colors blue, pink and black ) to separate the difference between the answers .	0	0	0	0	0	0	0	0	0	0	1	0	0	0	0	0	1	0	0	0	0	1	0	1	0	0	0	0	0	0	0	0	0	0	0	0	1	1
198	198	Laptop	Student 1	<500	Remote area	Swedish	Collaborative	Production	Observation	17	And proximity between the question and the answers to the different questions .	0	0	0	0	0	0	0	0	0	0	1	0	0	0	0	0	0	0	0	0	0	1	0	0	0	0	0	0	0	0	0	0	0	0	0	0	1	1
199	199	Laptop	Student 1	<500	Remote area	Swedish	Collaborative	Production	Observation	18	Because it is a Google document shared with the others and the teacher.	0	0	0	0	0	0	1	0	0	0	0	0	0	0	0	0	1	0	0	0	0	0	0	0	0	1	0	0	0	0	1	0	0	0	0	0	0	0
200	200	Laptop	Student 1	<500	Remote area	Swedish	Collaborative	Production	Observation	19	The student refers to the laptop and what the student writes .	0	0	1	0	0	0	0	0	0	0	0	1	0	0	0	1	0	0	0	0	0	1	0	0	0	0	0	0	0	0	0	0	0	0	0	0	0	0
201	201	Laptop	Student 1	<500	Remote area	Swedish	Collaborative	Production	Observation	20	And reads aloud from the displayed text on the laptop monitor .	0	0	1	0	0	1	0	1	0	1	0	1	0	0	0	1	0	0	0	0	0	0	0	0	0	0	0	0	0	0	0	0	0	0	0	0	1	0
202	202	Laptop	Student 1	<500	Remote area	Swedish	Collaborative	Production	Observation	21	The monitor is included in the joint knowledge construction.	0	0	0	0	0	1	0	0	0	0	0	0	0	0	0	0	0	0	0	0	0	0	0	0	0	0	0	0	0	0	0	0	0	0	0	0	0	0
203	203	Laptop	Student 1	<500	Remote area	Swedish	Collaborative	Production	Observation	22	And the meaning conveyed from the questions and the subject being discussed in production.	0	0	0	0	0	0	0	0	0	0	0	0	0	0	0	0	0	0	0	0	0	1	0	0	0	0	1	0	0	0	0	0	0	0	0	0	1	0
204	204	Laptop	Student 1	<500	Remote area	Swedish	Collaborative	Production	Observation	23	Which also means that subsequent textual supplements are being made.	0	0	1	0	0	0	0	0	0	0	0	1	0	0	0	0	0	0	0	0	0	0	0	0	0	0	0	0	0	0	0	0	0	0	0	0	0	0
205	205	Laptop	Student 1	<500	Remote area	Swedish	Collaborative	Production	Observation	24	The student enclose space by using the k-board enter tangent in the text to promote layout .	0	0	1	0	0	0	0	0	0	0	0	1	0	0	1	0	1	0	0	0	0	1	0	1	0	0	0	0	0	0	0	0	0	1	0	0	0	1
206	206	Laptop	Student 1	<500	Remote area	Swedish	Collaborative	Consumption	Observation	25	In Google classroom the subject designation badges icons are color coded but does not differ between the various topics .	1	0	0	0	1	0	1	0	0	0	0	0	0	0	1	0	0	0	0	0	0	0	0	0	1	0	1	0	0	0	0	0	0	0	0	0	1	1
207	207	Laptop	Student 1	<500	Remote area	Swedish	Collaborative	Production	Observation	26	Gaze is used towards what is displayed on the monitor and towards others during the discussion and the board.	0	0	0	0	0	1	0	1	0	0	0	1	0	0	0	0	1	0	0	0	0	1	0	0	0	0	0	0	1	0	1	0	0	0	0	0	1	0
208	208	Laptop	Student 1	<500	Remote area	Swedish	Collaborative	Production	Observation	27	Conversations is carried out in each group with a shoulder buddy.	0	0	1	0	0	0	0	0	0	0	1	1	0	0	0	0	0	0	0	0	0	1	0	0	0	0	0	0	0	0	0	0	0	0	0	0	1	0
209	209	Laptop	Student 1	<500	Remote area	Swedish	Collaborative	Production	Observation	28	The student types on the laptop k-board and tries to retake what the students are discussing about in producing the text .	0	0	1	1	0	0	0	0	0	0	0	1	0	0	1	1	1	0	0	0	0	1	0	0	0	0	0	0	0	0	0	0	0	1	0	0	1	0
210	210	Laptop	Student 1	<500	Remote area	Swedish	Collaborative	Production	Observation	29	The student reads to understand and process content from the displaying of the laptop monitor .	0	0	0	0	0	1	0	1	0	1	0	0	0	0	0	1	1	0	0	0	0	0	0	0	0	0	0	0	0	0	1	0	0	0	0	0	1	0
211	211	Laptop	Student 1	<500	Remote area	Swedish	Collaborative	Production	Observation	30	Student are discussing and collaborating to explicate the book content.	0	0	0	0	0	0	0	0	0	0	0	0	0	0	0	0	0	0	0	0	0	1	0	0	0	0	0	0	0	0	0	0	0	0	0	0	1	0
212	212	Laptop	Student 1	<500	Remote area	Swedish	Collaborative	Production	Observation	31	The teacher interrupts the discussion and gives information on the next task .	0	0	0	0	0	0	0	1	0	0	0	0	0	0	0	0	0	0	0	0	0	1	0	0	0	0	0	0	0	0	0	0	0	0	0	0	1	0
213	213	Laptop	Student 1	<500	Remote area	Swedish	Collaborative	Production	Observation	32	The students are making oral descriptions in collaboration and discussion with another friend.	0	0	1	0	0	0	0	0	0	0	0	1	0	0	0	0	0	0	0	0	0	1	0	0	0	0	0	0	0	0	0	0	0	0	0	0	1	0
214	214	Laptop	Student 1	<500	Remote area	Swedish	Collaborative	Production	Observation	33	How the room in the book is described . Speech is used.	0	0	1	0	0	0	0	0	0	0	1	1	0	0	0	0	0	0	0	0	0	1	0	0	0	0	0	0	0	0	0	0	0	0	0	0	0	0
215	215	Laptop	Student 1	<500	Remote area	Swedish	Collaborative	Production	Observation	34	How the room in the book is described . Speech is used.	0	0	1	0	0	0	0	0	0	0	1	1	0	0	0	0	0	0	0	0	0	1	0	0	0	0	0	0	0	0	0	0	0	0	0	0	0	0
216	216	Laptop	Student 1	<500	Remote area	Swedish	Collaborative	Consumption	Observation	35	One from each learning group is pick up their laptop Laptops .	0	0	0	0	0	0	0	0	0	0	0	0	0	0	0	1	0	0	0	0	0	0	0	0	0	0	0	0	0	0	0	0	0	0	0	0	1	0
217	217	Laptop	Student 1	<500	Remote area	Swedish	Collaborative	Consumption	Observation	36	For the teacher to share the Google document with.	0	0	0	0	0	0	1	0	0	0	0	0	0	0	0	0	1	0	0	0	0	0	0	0	0	1	0	0	0	0	1	0	0	0	0	0	0	0
218	218	Laptop	Student 1	<500	Remote area	Swedish	Individual	Consumption	Observation	37	The teacher explain that the students need to check that the email is shared .	0	0	0	0	0	0	0	1	0	0	0	0	0	0	0	0	1	0	0	0	0	0	0	0	0	0	0	0	0	0	1	0	0	0	0	0	1	0
219	219	Laptop	Student 1	<500	Remote area	Swedish	Individual	Consumption	Observation	38	And that they have received it.	0	0	0	0	0	0	0	0	0	0	0	0	0	0	0	0	1	0	0	0	0	0	0	0	0	0	0	0	0	0	1	0	0	0	0	0	0	0
220	220	Laptop	Student 1	<500	Remote area	Swedish	Individual	Consumption	Observation	39	The student access the email in silence by clicking on Google apps .	0	0	0	1	0	0	1	0	0	0	0	0	0	0	1	0	1	0	0	0	0	0	0	0	1	0	0	0	0	1	0	0	0	0	0	0	0	0
221	221	Laptop	Student 1	<500	Remote area	Swedish	Collaborative	Consumption	Observation	40	Focus in the group on describing nadja's room.	0	0	1	0	0	0	0	0	0	0	0	1	0	0	0	0	0	0	0	0	0	1	0	0	0	0	0	0	0	0	0	0	0	0	0	0	1	0
222	222	Laptop	Student 1	<500	Remote area	Swedish	Collaborative	Consumption	Observation	41	Individually and what read .	0	0	0	0	0	0	0	1	0	1	0	0	0	0	0	0	0	0	0	0	0	0	0	0	0	0	0	0	0	0	0	0	0	0	0	0	1	0
223	223	Laptop	Student 1	<500	Remote area	Swedish	Collaborative	Consumption	Observation	42	The secretary summarizes in text .	0	0	1	0	0	0	0	0	0	0	0	1	0	0	0	0	0	0	0	0	0	0	0	0	0	0	0	0	0	0	0	0	0	0	0	0	0	0
224	224	Laptop	Student 1	<500	Remote area	Swedish	Collaborative	Consumption	Observation	43	The teacher starts the clock in 10 minutes this time for the conversations .	0	0	1	0	0	0	0	0	0	0	1	1	0	1	1	0	1	0	0	0	0	1	0	0	1	0	0	0	0	0	1	0	0	0	0	0	0	0
225	225	Laptop	Student 1	<500	Remote area	Swedish	Collaborative	Consumption	Observation	44	Sound indicates when it is finished after 10 minutes.	0	0	0	0	0	0	0	0	0	0	0	0	0	0	0	0	0	0	0	0	0	0	0	0	0	0	0	0	0	0	0	0	0	0	0	0	0	1
226	226	Laptop	Student 1	<500	Remote area	Swedish	Collaborative	Production	Observation	45	The words are discussed in full class.	0	0	0	0	0	0	0	0	0	0	0	0	0	0	0	0	0	0	0	0	0	1	0	0	0	0	0	0	0	0	0	0	0	0	0	0	1	0
227	227	Laptop	Student 1	<500	Remote area	Swedish	Collaborative	Production	Observation	46	The students listen and are assigned the word after raising their hand .	0	0	0	0	0	0	0	1	0	1	0	1	0	0	0	0	0	0	0	0	0	1	0	0	0	0	0	0	1	0	0	0	0	0	0	0	1	0
228	228	Laptop	Student 1	<500	Remote area	Swedish	Collaborative	Production	Observation	47	Conversations in spoken language .	0	0	1	0	0	0	0	0	0	0	1	1	0	0	0	0	0	0	0	0	0	1	0	0	0	0	0	0	0	0	0	0	0	0	0	0	1	0
229	229	Laptop	Student 1	<500	Remote area	Swedish	Collaborative	Production	Observation	48	The children sit in groups of four in the classroom facilitating group conversations .	0	0	1	0	0	0	0	0	0	0	1	1	0	0	0	0	0	0	0	0	0	1	0	0	0	0	0	0	0	0	0	0	0	0	0	0	1	0
230	230	Laptop	Student 1	<500	Remote area	Geography	Individual	Consumption	Observation	49	Geography 8: 45-9: 25 - How mountains arise	0	0	0	0	0	0	0	0	0	0	0	0	1	0	0	0	0	0	0	0	0	0	0	0	0	0	1	0	0	0	0	0	0	0	0	0	1	0
231	231	Laptop	Student 1	<500	Remote area	Geography	Individual	Consumption	Observation	50	Movie projecting to the whole class on board by the projector .	0	0	0	0	0	1	1	1	0	0	0	0	0	0	0	0	0	1	0	0	0	0	0	0	0	0	0	0	0	0	0	0	0	0	0	0	0	0
232	232	Laptop	Student 1	<500	Remote area	Geography	Individual	Consumption	Observation	51	Students get to watch at the movie .	0	0	0	0	0	0	1	1	0	1	0	0	0	0	0	0	0	1	0	0	0	0	0	0	0	0	0	0	0	0	0	0	0	0	0	0	1	0
233	233	Laptop	Student 1	<500	Remote area	Geography	Individual	Consumption	Observation	52	After the film , the students move back and they will pick up their books.	0	0	0	0	0	0	1	0	0	0	0	1	0	0	0	0	0	1	0	0	0	0	0	0	0	0	0	0	1	0	0	0	0	0	0	0	0	0
234	234	Laptop	Student 1	<500	Remote area	Geography	Individual	Consumption	Observation	53	The geography book about Europe .	0	0	0	0	0	0	0	0	0	0	0	0	1	0	0	0	0	0	0	0	0	0	0	0	0	0	1	0	0	0	0	0	0	0	0	0	1	0
235	235	Laptop	Student 1	<500	Remote area	Geography	Individual	Production	Observation	54	Students use their laptop Laptops and work individually .	0	0	0	0	0	0	0	0	0	1	0	0	0	0	0	1	0	0	0	0	0	0	0	0	0	0	0	0	0	0	0	0	0	0	0	0	1	0
236	236	Laptop	Student 1	<500	Remote area	Geography	Individual	Consumption	Observation	55	Questions from the film on mountains .	0	0	0	0	0	0	1	0	0	0	0	0	1	0	0	0	0	1	0	0	0	0	0	0	0	0	1	0	0	0	0	0	0	0	0	0	1	0
237	237	Laptop	Student 1	<500	Remote area	Geography	Individual	Consumption	Observation	56	How mountains arise. Focus on Europe's mountains .	0	0	0	0	0	0	0	0	0	0	0	0	1	0	0	0	0	0	0	0	0	0	0	0	0	0	1	0	0	0	0	0	0	0	0	0	1	0
238	238	Laptop	Student 1	<500	Remote area	Geography	Individual	Consumption	Observation	57	First, the book is read orally .	0	0	1	0	0	0	0	1	0	1	1	1	0	0	0	0	0	0	0	0	0	0	0	0	0	0	0	0	0	0	0	0	0	0	0	0	1	0
239	239	Laptop	Student 1	<500	Remote area	Geography	Individual	Consumption	Observation	58	Seven mountain ranges to be known.	0	0	0	0	0	0	0	0	0	0	0	0	1	0	0	0	0	0	0	0	0	0	0	0	0	0	1	0	0	0	0	0	0	0	0	0	1	0
240	240	Laptop	Student 1	<500	Remote area	Geography	Individual	Consumption	Observation	59	Assignments and exercise are organized in the Google classroom through different designation badges and window tabs .	0	0	0	0	1	0	1	1	0	0	0	0	0	0	1	0	0	0	0	0	0	1	0	0	1	0	0	0	0	0	0	0	0	0	0	0	1	0
241	241	Laptop	Student 1	<500	Remote area	Geography	Individual	Production	Observation	60	Turns on the laptop and in the Google classroom .	0	0	0	1	0	0	1	0	0	0	0	0	0	0	0	1	1	0	0	0	0	0	0	0	0	0	0	0	0	0	0	0	0	0	0	0	0	0
242	242	Laptop	Student 1	<500	Remote area	Geography	Individual	Production	Observation	61	There is a hyperlink that they should access to Seterra.com .	0	0	0	1	0	0	1	0	0	0	0	0	0	0	1	0	1	1	0	0	0	0	0	0	1	0	0	0	0	1	0	0	0	0	0	0	0	0
243	243	Laptop	Student 1	<500	Remote area	Geography	Individual	Production	Observation	62	The student logs in via to classroom icon to access the tasks .	1	0	0	1	0	0	0	1	0	0	0	0	0	0	1	0	1	0	0	0	0	1	0	0	1	0	0	0	0	0	0	0	0	0	0	0	1	0
244	244	Laptop	Student 1	<500	Remote area	Geography	Individual	Consumption	Observation	63	A task in a Google document is accessed that provides information .	0	0	0	1	0	0	1	1	0	0	0	0	0	0	0	0	1	0	0	0	0	1	0	0	0	1	0	0	0	0	0	0	0	0	0	0	1	0
245	245	Laptop	Student 1	<500	Remote area	Geography	Individual	Production	Observation	64	The student get to practice the map in Seterra.com .	0	0	0	0	0	0	1	1	0	1	0	0	1	0	0	0	0	1	0	0	0	1	0	0	0	0	1	0	0	0	0	0	0	0	0	0	1	0
246	246	Laptop	Student 1	<500	Remote area	Geography	Individual	Consumption	Observation	65	The student alternates between reading in the book and what is displayed on the monitor .	0	0	0	0	0	1	0	1	0	1	0	0	0	0	0	0	1	0	0	0	0	0	0	0	0	0	0	0	0	0	1	0	0	0	0	0	1	0
247	247	Laptop	Student 1	<500	Remote area	Geography	Individual	Production	Observation	66	The student navigate with the help of the mouse pad .	0	0	0	1	0	0	0	0	0	0	0	0	0	0	1	0	1	0	0	0	0	0	0	0	0	0	0	0	0	0	0	0	0	1	0	0	0	0
248	248	Laptop	Student 1	<500	Remote area	Geography	Individual	Production	Observation	67	And hoover only on the map displayed on the laptop monitor to explore the countries on the map .	0	0	0	0	0	1	0	0	0	0	0	0	1	0	0	1	1	0	0	0	0	0	0	0	0	0	1	0	0	0	1	0	0	0	0	0	1	0
249	249	Laptop	Student 1	<500	Remote area	Geography	Individual	Production	Observation	68	The interactive cursor is used to compare it with the book and positioning it .	0	0	0	0	0	0	0	0	0	0	0	0	0	1	1	0	1	0	0	0	0	0	0	0	1	0	0	0	0	0	1	0	0	0	0	0	0	0
250	250	Laptop	Student 1	<500	Remote area	Geography	Individual	Production	Observation	69	The student tries to assign the name of the countries in the right place by using the mouse over function.	0	0	0	0	0	0	0	0	0	0	0	0	1	0	0	0	0	0	0	0	0	0	0	0	0	0	0	0	0	0	0	0	0	0	0	0	0	0
251	251	Laptop	Student 1	<500	Remote area	Geography	Individual	Production	Observation	70	The student uses gaze to watch what is displayed in book and on the monitor .	0	0	0	0	0	1	0	1	0	1	0	1	0	0	0	0	1	0	0	0	0	0	0	0	0	0	0	0	1	0	1	0	0	0	0	0	1	0
252	252	Laptop	Student 1	<500	Remote area	Geography	Individual	Production	Observation	71	Hoover with the Hmouse so that designation badges across the different countries is visible .	0	0	0	0	1	1	0	0	0	0	0	0	1	0	1	0	1	0	0	0	0	0	0	0	1	0	0	0	0	0	1	0	0	0	0	0	0	1
253	253	Laptop	Student 1	<500	Remote area	Geography	Individual	Consumption	Observation	72	When coupling succeeds, a finish symbol will appear with the right result on the map .	1	0	0	0	0	0	0	0	0	0	0	0	1	0	1	0	0	0	0	0	0	0	0	0	1	0	1	0	0	0	0	0	0	0	0	0	1	0
254	254	Laptop	Student 1	<500	Remote area	Geography	Individual	Consumption	Observation	73	And also a pop-up box with percentage of right results and numbers for the time it took to complete the task .	0	0	0	0	0	0	0	1	0	0	0	0	0	0	1	0	1	0	0	0	0	1	1	0	1	0	0	0	0	0	1	0	0	0	0	0	1	1
255	255	Laptop	Student 1	<500	Remote area	Geography	Individual	Production	Observation	74	The student can match written text for the mountains with land on the map in green and white colors .	0	0	1	0	0	0	0	0	0	0	0	1	1	0	0	0	0	0	0	0	0	1	0	0	0	0	1	0	0	0	0	0	0	0	0	0	1	1
256	256	Laptop	Student 1	<500	Remote area	Geography	Individual	Production	Observation	75	And when the right name is placed on the map , the name is enclosed and yellow .	0	0	0	0	0	0	0	0	0	0	0	0	1	0	0	0	1	0	0	0	0	0	0	1	0	0	1	0	0	0	0	0	0	0	0	0	1	1
257	257	Laptop	Student 1	<500	Remote area	Geography	Individual	Production	Observation	76	The student repeats the task and then it ends up at the top of the website where there are pictures .	0	0	0	0	0	0	1	1	0	0	0	0	0	0	0	0	0	0	0	0	1	1	0	0	0	0	0	0	0	0	0	0	0	0	0	0	1	1
258	258	Laptop	Student 1	<500	Remote area	Geography	Individual	Production	Observation	77	Also occasionally navigates back to Google document .	0	0	0	1	0	0	1	0	0	0	0	0	0	0	0	0	1	0	0	0	0	0	0	0	0	1	0	0	0	0	0	0	0	0	0	0	0	0
259	259	Laptop	Student 1	<500	Remote area	Geography	Individual	Production	Observation	78	Navigates with mouse pad .	0	0	0	1	0	0	0	0	0	0	0	0	0	0	1	0	1	0	0	0	0	0	0	0	0	0	0	0	0	0	0	0	0	1	0	0	0	0
260	260	Tablet	Student 2	>500	Urban area	Swedish	Individual	Consumption	Video rec.	1	It is a Swedish lesson , and the purpose is to learn how to make a new Google document in Google classroom .	0	0	0	0	0	0	1	0	0	0	0	0	0	0	0	0	0	0	1	0	0	0	0	0	0	1	1	0	0	0	0	1	0	0	0	0	1	0
261	261	Tablet	Student 2	>500	Urban area	Swedish	Individual	Consumption	Video rec.	2	And to write a story .	0	0	0	0	0	0	0	0	0	1	0	0	0	0	0	0	0	0	0	0	0	1	0	0	0	0	0	0	0	0	0	0	0	0	0	0	1	0
262	262	Tablet	Student 2	>500	Urban area	Swedish	Individual	Production	Video rec.	3	The Student alters orientation on the tablet monitor horizontally to access the virtual keyboard .	1	0	0	1	0	1	0	0	1	0	0	0	0	0	1	0	1	0	0	0	0	0	0	0	1	0	0	0	0	1	0	0	0	1	0	0	0	0
263	263	Tablet	Student 2	>500	Urban area	Swedish	Individual	Production	Video rec.	4	And types the passcode on the password line .	0	0	0	1	0	0	0	0	0	0	0	0	0	0	1	0	1	0	0	0	0	0	1	0	1	0	0	0	0	0	0	0	0	0	0	0	0	1
264	264	Tablet	Student 2	>500	Urban area	Swedish	Individual	Production	Video rec.	5	The student types with thumbs by tapping them on the monitor and sees blotches that resemble passcode .	0	0	0	1	0	1	0	0	0	0	0	0	0	0	0	0	1	0	0	0	0	0	0	0	0	0	0	0	0	0	0	0	0	0	0	0	0	1
265	265	Tablet	Student 2	>500	Urban area	Swedish	Individual	Production	Video rec.	6	And taps the enter button [sem.func.prop.] to confirm.	0	0	0	1	0	0	0	0	0	0	0	0	0	0	1	0	1	0	0	0	0	0	0	0	1	0	0	0	0	0	0	0	0	0	0	0	0	0
266	266	Tablet	Student 2	>500	Urban area	Swedish	Individual	Production	Video rec.	7	The student double clicks on the home button on the tablet to access the home screen .	1	0	0	1	0	0	0	0	1	0	0	0	0	0	1	0	1	0	0	0	0	0	0	0	1	0	0	0	0	0	0	0	0	0	0	0	0	0
267	267	Tablet	Student 2	>500	Urban area	Swedish	Individual	Production	Video rec.	8	The student taps the classroom orange symbol on the home screen to access the Google classroom .	1	0	0	1	0	0	1	0	0	0	0	0	0	0	1	0	1	0	0	0	0	0	0	0	1	0	0	0	0	0	0	0	0	0	0	0	0	0
268	268	Tablet	Student 2	>500	Urban area	Swedish	Individual	Production	Video rec.	9	To retrieve a new Google document there as explained by the teacher.	0	0	0	1	0	0	1	0	0	0	0	0	0	0	0	0	1	0	0	0	0	0	0	0	0	1	0	0	0	0	0	0	0	0	0	0	1	0
269	269	Tablet	Student 2	>500	Urban area	Swedish	Individual	Consumption	Video rec.	10	The Google classroom is projected with the projector on the VDU .	0	0	0	0	0	1	1	1	0	0	0	0	0	0	0	0	0	0	0	0	0	0	0	0	0	0	0	0	0	0	0	0	0	0	0	0	0	0
270	270	Tablet	Student 2	>500	Urban area	Swedish	Individual	Consumption	Video rec.	11	The students are watching and listening to an explanation made by the teacher.	0	0	0	0	0	0	0	1	0	1	0	0	0	0	0	0	0	0	0	0	0	0	0	0	0	0	0	0	0	0	0	0	0	0	0	0	1	0
271	271	Tablet	Student 2	>500	Urban area	Swedish	Individual	Consumption	Video rec.	12	The student lays down the tablet on the table after listening to and watching the instruction form the teacher.	0	0	0	0	0	0	0	1	1	1	0	0	0	0	0	0	0	0	0	0	0	0	0	0	0	0	0	0	0	0	0	0	0	0	0	0	1	0
272	272	Tablet	Student 2	>500	Urban area	Swedish	Individual	Production	Video rec.	13	The Student alter orientation on the tablet monitor horizontally to access the virtual keyboard .	1	0	0	1	0	1	0	0	1	0	0	0	0	0	1	0	1	0	0	0	0	0	0	0	1	0	0	0	0	1	0	0	0	1	0	0	0	0
273	273	Tablet	Student 2	>500	Urban area	Swedish	Individual	Production	Video rec.	14	And type the passcode on the password line by the blotches and the Google classroom is accessed .	0	0	0	1	0	0	1	0	0	0	0	0	0	0	1	0	1	0	0	0	0	0	1	0	1	1	0	0	0	0	0	0	0	0	0	0	0	1
274	274	Tablet	Student 2	>500	Urban area	Swedish	Individual	Production	Video rec.	15	The student taps on your work button to access the right Google documents in order to projecting it .	1	0	0	0	0	0	1	1	0	0	0	0	0	0	1	0	0	0	0	0	0	0	0	0	1	1	0	0	0	0	0	0	0	0	0	0	0	0
275	275	Tablet	Student 2	>500	Urban area	Swedish	Individual	Production	Video rec.	16	The student taps on one of the Google document designation badges with the thumb.	0	0	0	1	1	0	1	0	0	0	0	0	0	0	1	0	1	0	0	0	0	0	0	0	1	1	0	0	0	0	0	0	0	0	0	0	0	0
276	276	Tablet	Student 2	>500	Urban area	Swedish	Individual	Production	Video rec.	17	To access a picture and to display and view it.	0	0	0	1	0	0	0	0	0	0	0	0	0	0	0	0	1	0	0	0	0	0	0	0	0	0	0	0	0	0	1	0	0	0	0	0	0	1
277	277	Tablet	Student 2	>500	Urban area	Swedish	Individual	Production	Video rec.	18	The student navigates by exiting and by tapping the back arrow button at the top left corner of the Google document .	1	0	0	1	0	0	1	0	0	0	0	0	0	0	1	0	1	0	0	0	0	0	0	0	1	1	0	0	0	0	0	0	0	0	0	0	0	0
278	278	Tablet	Student 2	>500	Urban area	Swedish	Individual	Production	Video rec.	19	The student taps on one of the Google documents designation badges with the thumb to access a Google document with a picture to display and view it in relation to what the teacher explains.	0	0	0	1	1	0	1	1	0	0	0	0	0	0	1	0	1	0	0	0	0	0	0	0	1	1	0	0	0	0	1	0	0	0	0	0	1	1
279	279	Tablet	Student 2	>500	Urban area	Swedish	Individual	Production	Video rec.	20	The student navigates by exiting and by tapping the back arrow button at the top left corner of the Google document .	1	0	0	1	0	0	1	0	0	0	0	0	0	0	1	0	1	0	0	0	0	0	0	0	1	1	0	0	0	0	0	0	0	0	0	0	0	0
280	280	Tablet	Student 2	>500	Urban area	Swedish	Individual	Production	Video rec.	21	The student navigates and exits by tapping the down arrow button .	1	0	0	1	0	0	0	0	0	0	0	0	0	0	1	0	1	0	0	0	0	0	0	0	1	0	0	0	0	0	0	0	0	0	0	0	0	0
281	281	Tablet	Student 2	>500	Urban area	Swedish	Individual	Production	Video rec.	22	The student navigates back in the Google document the student started with by scrolling .	0	0	0	1	0	0	1	0	0	0	0	0	0	0	0	0	1	0	0	0	0	0	0	0	0	1	0	0	0	0	1	0	0	0	0	0	0	0
282	282	Tablet	Student 2	>500	Urban area	Swedish	Individual	Production	Video rec.	23	And then the student taps on the back arrow button in the top left corner of the Google document .	1	0	0	1	0	0	1	0	0	0	0	0	0	0	1	0	1	0	0	0	0	0	0	0	1	1	0	0	0	0	0	0	0	0	0	0	0	0
283	283	Tablet	Student 2	>500	Urban area	Swedish	Individual	Production	Video rec.	24	The student double clicks the home button to tap and access the recent apps .	1	0	0	1	1	0	0	0	0	0	0	0	0	0	1	0	1	0	0	0	0	0	0	0	1	0	0	0	0	0	0	0	0	0	0	0	0	0
284	284	Tablet	Student 2	>500	Urban area	Swedish	Individual	Production	Video rec.	25	And taps on the document window [sem.res.func.] with the assignment .	0	0	0	1	1	0	0	1	0	0	0	0	0	0	1	0	1	0	0	0	0	1	0	0	1	0	0	0	0	0	0	0	0	0	0	0	0	0
285	285	Tablet	Student 2	>500	Urban area	Swedish	Individual	Production	Video rec.	26	The student exits the document window [sem.res.func.] in the recent apps [sem.res.func.] to navigate back on the home screen .	1	0	0	1	1	0	0	0	0	0	0	0	0	0	1	0	1	0	0	0	0	0	0	0	1	0	0	0	0	0	0	0	0	0	0	0	0	0
286	286	Tablet	Student 2	>500	Urban area	Swedish	Individual	Production	Video rec.	27	And there taps the Classroom app orange symbol instead to navigate back to the joint realm of the Google classroom .	1	0	0	1	0	0	1	0	0	0	0	0	0	0	1	0	1	0	0	0	0	0	0	0	1	1	0	0	0	0	0	0	0	0	0	0	0	0
287	287	Tablet	Student 2	>500	Urban area	Swedish	Individual	Production	Video rec.	28	And the individually composed Google document .	0	0	0	0	0	0	1	0	0	1	0	0	0	0	0	0	0	0	0	0	0	1	0	0	0	1	0	0	0	0	0	0	0	0	0	0	1	0
288	288	Tablet	Student 2	>500	Urban area	Swedish	Individual	Production	Video rec.	29	The student taps on the present all button on the top right corner.	1	0	0	1	0	0	0	0	0	0	0	0	0	0	1	0	1	0	0	0	0	0	0	0	1	0	0	0	0	0	0	0	0	0	0	0	0	0
289	289	Tablet	Student 2	>500	Urban area	Swedish	Individual	Production	Video rec.	30	The student taps on one the document page to view it.	0	0	0	1	1	0	0	0	0	0	0	0	0	0	1	0	1	0	0	0	0	0	0	0	1	0	0	0	0	0	1	0	0	0	0	0	0	0
290	290	Tablet	Student 2	>500	Urban area	Swedish	Individual	Production	Video rec.	31	The student exits the Google document by tapping on the back arrow button .	1	0	0	1	0	0	1	0	0	0	0	0	0	0	1	0	1	0	0	0	0	0	0	0	1	1	0	0	0	0	0	0	0	0	0	0	0	0
291	291	Tablet	Student 2	>500	Urban area	Swedish	Individual	Production	Video rec.	32	The student then touches the plus symbol on the right bottom corner to add a new Google document .	1	0	0	0	0	0	1	0	0	0	0	0	0	0	1	0	1	0	0	0	0	1	0	0	1	1	0	0	0	0	1	0	0	0	0	0	0	0
292	292	Tablet	Student 2	>500	Urban area	Swedish	Individual	Consumption	Video rec.	33	A pop-up (superimposed) window appears that allows for the name of the Google document to be inscribed .	0	0	0	0	1	0	1	0	0	0	0	0	0	0	1	0	1	0	0	0	0	0	0	0	1	1	0	0	0	0	1	0	0	0	0	0	0	0
293	293	Tablet	Student 2	>500	Urban area	Swedish	Individual	Consumption	Video rec.	34	By writing on a rename line with a autogenerated virtual keyboard.	1	0	1	0	0	0	0	0	0	0	0	1	0	0	1	0	0	0	0	0	0	1	1	0	1	0	0	0	0	0	0	0	0	0	0	0	0	0
294	294	Tablet	Student 2	>500	Urban area	Swedish	Individual	Production	Video rec.	35	The student enclose three emojis to make the heading more happy.	0	0	0	0	0	0	0	0	0	0	0	0	0	0	0	0	1	0	0	0	0	1	0	1	0	0	0	0	0	0	0	0	0	0	0	0	0	1
295	295	Tablet	Student 2	>500	Urban area	Swedish	Individual	Production	Video rec.	36	The student taps on the rename designation badge to confirm the name.	0	0	0	1	1	0	0	0	0	0	0	0	0	0	1	0	1	0	0	0	0	0	0	0	1	0	0	0	0	0	0	0	0	0	0	0	0	0
296	296	Tablet	Student 2	>500	Urban area	Swedish	Individual	Production	Video rec.	37	And then accesses the Google documents editing field via the pencil symbol button .	1	0	0	1	0	0	1	0	0	0	0	0	0	0	1	0	1	0	0	0	0	0	1	0	1	1	0	0	0	0	0	0	0	0	0	0	0	0
297	297	Tablet	Student 2	>500	Urban area	Swedish	Individual	Consumption	Video rec.	38	The student then puts away the tablet and listens to the teacher read a part of a story .	0	0	0	0	0	0	0	1	1	1	0	0	0	0	0	0	0	0	0	0	0	1	0	0	0	0	0	0	0	0	0	0	0	0	0	0	1	0
298	298	Tablet	Student 2	>500	Urban area	Swedish	Individual	Production	Video rec.	39	The student starts to write the text with his thumbs on the autogenerated virtual keyboard in the Google document .	1	0	1	0	0	0	1	0	0	0	0	1	0	0	1	0	0	0	0	0	0	1	0	0	1	1	0	0	0	0	0	0	0	0	0	0	0	0
299	299	Tablet	Student 2	>500	Urban area	Swedish	Individual	Production	Video rec.	40	The student begins with writing the name the story by writing a headline in the title field .	0	0	1	0	0	0	0	0	0	1	0	1	0	0	1	0	0	0	0	0	0	1	1	0	1	0	0	0	0	0	0	0	0	0	0	0	1	1
300	300	Tablet	Student 2	>500	Urban area	Swedish	Individual	Production	Video rec.	41	The student taps on the back arrow button to navigate and exit the Google document .	1	0	0	1	0	0	1	0	0	0	0	0	0	0	1	0	1	0	0	0	0	0	0	0	1	1	0	0	0	0	0	0	0	0	0	0	0	0
301	301	Tablet	Student 2	>500	Urban area	Swedish	Individual	Production	Video rec.	42	The student are instructed to tap on the three blotches at the document page in Google Classroom .	0	0	0	1	1	0	1	1	0	0	0	0	0	0	1	0	1	0	0	0	0	0	0	0	1	0	0	0	0	0	0	0	0	0	0	0	1	1
302	302	Tablet	Student 2	>500	Urban area	Swedish	Individual	Consumption	Video rec.	43	A menu record with a range of designations opens.	0	0	0	1	0	0	0	0	0	0	0	0	0	0	1	0	1	0	0	1	0	0	0	0	1	0	0	0	0	0	0	0	0	0	0	0	0	0
303	303	Tablet	Student 2	>500	Urban area	Swedish	Individual	Consumption	Video rec.	44	The student are instructed to tap the rename pencil to adjust name their story .	0	0	0	1	0	0	0	1	0	1	0	0	0	0	1	0	1	0	0	0	0	1	1	0	1	0	0	0	0	0	1	0	0	0	0	0	1	0
304	304	Tablet	Student 2	>500	Urban area	Swedish	Individual	Production	Video rec.	45	The student double clicks the home button to access the recent apps button [sem.res.func.].	1	0	0	1	1	0	0	0	0	0	0	0	0	0	1	0	1	0	0	0	0	0	0	0	1	0	0	0	0	0	0	0	0	0	0	0	0	0
305	305	Tablet	Student 2	>500	Urban area	Swedish	Individual	Production	Video rec.	46	The student then taps the Google classroom orange symbol to access the joint classroom.	1	0	0	1	0	0	1	0	0	0	0	0	0	0	1	0	1	0	0	0	0	0	0	0	1	0	0	0	0	0	0	0	0	0	0	0	0	0
306	306	Tablet	Student 2	>500	Urban area	Swedish	Individual	Production	Video rec.	47	The student taps on the document page and then the your work button to access the documents pages .	1	0	0	1	1	0	0	0	0	0	0	0	0	0	1	0	1	0	0	0	0	0	0	0	1	0	0	0	0	0	0	0	0	0	0	0	0	0
307	307	Tablet	Student 2	>500	Urban area	Swedish	Individual	Production	Video rec.	48	The student then double clicks the home button [sem.res.func.] again to access the recent apps button [sem.res.func.].	1	0	0	1	0	0	0	0	0	0	0	0	0	0	1	0	1	0	0	0	0	0	0	0	1	0	0	0	0	0	0	0	0	0	0	0	0	0
308	308	Tablet	Student 2	>500	Urban area	Swedish	Individual	Production	Video rec.	49	And to access the Google document to write in.	0	0	1	1	0	0	1	0	0	0	0	1	0	0	0	0	1	0	0	0	0	1	0	0	0	1	0	0	0	0	0	0	0	0	0	0	0	0
309	309	Tablet	Student 2	>500	Urban area	Swedish	Individual	Consumption	Video rec.	50	The class gets to listen to a story read out loud by the teacher.	0	0	0	0	0	0	0	1	0	1	0	0	0	0	0	0	0	0	0	0	0	1	0	0	0	0	0	0	0	0	0	0	0	0	0	0	1	0
310	310	Tablet	Student 2	>500	Urban area	Swedish	Individual	Production	Video rec.	51	The Student alter orientation on the tablet monitor horizontally to activate and access the virtual keyboard .	1	0	0	1	0	1	0	0	1	0	0	0	0	0	1	0	1	0	0	0	0	0	0	0	1	0	0	0	0	1	0	0	0	1	0	0	0	0
311	311	Tablet	Student 2	>500	Urban area	Swedish	Individual	Production	Video rec.	52	And types the passcode on the password line by typing the blotches and the Google classroom is accessed .	0	0	0	1	0	0	1	0	0	0	0	0	0	0	1	0	1	0	0	0	0	0	1	0	1	1	0	0	0	0	0	0	0	0	0	0	0	1
312	312	Tablet	Student 2	>500	Urban area	Swedish	Individual	Production	Video rec.	53	The student then double clicks to get to the recent apps and then taps the Spotify window [sem. rep.func.] then touches the shuffle play button [sem. rep.func.].	1	0	0	1	1	0	0	0	0	0	0	0	0	0	1	0	1	0	0	0	0	0	0	0	1	0	0	0	0	0	1	0	0	0	0	0	0	0
313	313	Tablet	Student 2	>500	Urban area	Swedish	Individual	Production	Video rec.	54	The student double clicks on the home button again to access the recent apps.	1	0	0	1	1	0	0	0	0	0	0	0	0	0	1	0	1	0	0	0	0	0	0	0	1	0	0	0	0	0	0	0	0	0	0	0	0	0
314	314	Tablet	Student 2	>500	Urban area	Swedish	Individual	Production	Video rec.	55	And then to access the Google document in Google classroom via the document page.	0	0	0	1	1	0	1	0	0	0	0	0	0	0	1	0	1	0	0	0	0	0	0	0	1	1	0	0	0	0	0	0	0	0	0	0	0	0
315	315	Tablet	Student 2	>500	Urban area	Swedish	Individual	Production	Video rec.	56	The student taps the pencil symbol at the bottom right corner that to activate the virtual keyboard .	1	0	0	1	0	0	0	0	0	0	0	0	0	0	1	0	1	0	0	0	0	1	0	0	1	0	0	0	0	0	0	0	0	0	0	0	0	0
316	316	Tablet	Student 2	>500	Urban area	Swedish	Individual	Production	Video rec.	57	The student taps to position the cursor line in the editing field and starts to write the text .	0	0	1	1	0	0	0	0	0	0	0	1	0	1	1	0	1	0	0	0	0	1	1	0	1	0	0	0	0	0	1	0	0	0	0	0	0	0
317	317	Tablet	Student 2	>500	Urban area	Swedish	Individual	Production	Video rec.	58	The student uses the enter button to separate and make distance by space between writing the headline and the following text .	1	0	1	0	0	0	0	0	0	0	0	1	0	0	1	0	1	0	0	0	0	1	0	1	1	0	0	0	0	0	0	0	0	0	0	0	0	1
318	318	Tablet	Student 2	>500	Urban area	Swedish	Individual	Consumption	Video rec.	59	The student reads a paper with the assignment on and then starts to write .	0	0	1	0	0	0	0	1	0	1	0	1	0	0	0	0	0	0	0	0	0	1	0	0	0	0	0	0	0	0	0	0	0	0	0	0	1	0
319	319	Tablet	Student 2	>500	Urban area	Swedish	Individual	Production	Video rec.	60	The student uses the spacing button , the backspac button to erase and the letter buttons .	1	0	0	0	0	0	0	0	0	0	0	0	0	0	1	0	1	0	0	0	0	1	0	1	1	0	0	0	0	0	0	0	0	0	0	0	0	0
320	320	Tablet	Student 2	>500	Urban area	Swedish	Individual	Production	Video rec.	61	The student applies the word suggestion on the top of the virtual keyboard word prediction in the toolbar .	1	0	0	0	0	0	0	0	0	0	0	0	0	1	1	0	1	0	0	0	0	0	0	1	1	0	0	0	0	1	0	0	0	0	0	0	0	1
321	321	Tablet	Student 2	>500	Urban area	Swedish	Individual	Production	Video rec.	62	To correct the red underlined incorrect spelling .	0	0	0	0	0	0	0	0	0	0	0	0	0	0	1	0	1	0	0	0	0	0	0	1	1	0	0	0	0	1	0	0	0	0	0	0	0	0
322	322	Tablet	Student 2	>500	Urban area	Swedish	Individual	Production	Video rec.	63	The student swipe down the contr. center to adjust tune by touching the forward arrow on the Spotify shortcut .	0	0	0	0	1	0	1	0	0	0	0	0	0	0	1	0	1	0	0	0	0	0	0	0	1	0	0	0	0	0	1	0	0	0	0	0	0	0
323	323	Tablet	Student 2	>500	Urban area	Swedish	Individual	Production	Video rec.	64	The student Swipe up to leave the contr. center .	0	0	0	0	1	0	0	0	0	0	0	0	0	0	1	0	1	0	0	0	0	0	0	0	1	0	0	0	0	0	1	0	0	0	0	0	0	0
324	324	Tablet	Student 2	>500	Urban area	Swedish	Individual	Production	Video rec.	65	The student uses the enter button to separate and make distance by making spaces in the text .	1	0	1	0	0	0	0	0	0	0	0	1	0	0	1	0	1	0	0	0	0	0	0	1	1	0	0	0	0	0	0	0	0	0	0	0	0	1
325	325	Tablet	Student 2	>500	Urban area	Swedish	Individual	Production	Video rec.	66	The student uses the backspac button to erase and correct .	1	0	0	0	0	0	0	0	0	0	0	0	0	0	1	0	1	0	0	0	0	0	0	1	1	0	0	0	0	0	0	0	0	0	0	0	0	0
326	326	Tablet	Student 2	>500	Urban area	Swedish	Individual	Production	Video rec.	67	The student uses the letter buttons on the virtual keyboard to write text .	1	0	1	0	0	0	0	0	0	0	0	1	0	0	1	0	0	0	0	0	0	1	0	0	1	0	0	0	0	0	0	0	0	0	0	0	0	0
327	327	Tablet	Student 2	>500	Urban area	Swedish	Individual	Production	Video rec.	68	The student taps the back button on the top left corner of the Google document to exit the typing mode and the virtual keyboard .	1	0	0	1	0	0	1	0	0	0	0	0	0	0	1	0	1	0	0	0	0	1	0	0	1	1	0	0	0	0	0	0	0	0	0	0	0	0
328	328	Tablet	Student 2	>500	Urban area	Swedish	Individual	Consumption	Video rec.	69	The student reads through the text in silence.	0	0	1	0	0	0	0	1	0	1	0	1	0	0	0	0	0	0	0	0	0	0	0	0	0	0	0	0	0	0	0	0	0	0	0	0	1	0
329	329	Tablet	Student 2	>500	Urban area	Swedish	Individual	Production	Video rec.	70	The student taps the pencil symbol in the right lower corner, the virtual keyboard is activated . The student	1	0	0	1	0	0	0	0	0	0	0	0	0	0	1	0	1	0	0	0	0	0	0	0	1	0	0	0	0	0	0	0	0	0	0	0	0	0
330	330	Tablet	Student 2	>500	Urban area	Swedish	Individual	Production	Video rec.	71	The student starts writing again to continue with the text .	0	0	1	0	0	0	0	0	0	0	0	1	0	0	0	0	0	0	0	0	0	1	0	0	0	0	0	0	0	0	0	0	0	0	0	0	0	0
331	331	Tablet	Student 2	>500	Urban area	Swedish	Individual	Production	Video rec.	72	The student uses the enter button to separate and make distance by making spaces in the text .	1	0	1	0	0	0	0	0	0	0	0	1	0	0	1	0	1	0	0	0	0	0	0	1	1	0	0	0	0	0	0	0	0	0	0	0	0	1
332	332	Tablet	Student 2	>500	Urban area	Swedish	Individual	Production	Video rec.	73	The backspac button to erase and correct .	1	0	0	0	0	0	0	0	0	0	0	0	0	0	1	0	1	0	0	0	0	0	0	1	1	0	0	0	0	0	0	0	0	0	0	0	0	0
333	333	Tablet	Student 2	>500	Urban area	Swedish	Individual	Production	Video rec.	74	And the letter buttons on the virtual keyboard to write text .	1	0	1	0	0	0	0	0	0	0	0	1	0	0	1	0	0	0	0	0	0	1	0	0	1	0	0	0	0	0	0	0	0	0	0	0	0	0
334	334	Tablet	Student 2	>500	Urban area	Swedish	Individual	Production	Video rec.	75	The student swipe up and swipe down on the monitor to read at the text .	0	0	1	0	0	1	0	1	0	1	0	1	0	0	0	0	1	0	0	0	0	0	0	0	0	0	0	0	0	0	1	0	0	0	0	0	1	0
335	335	Tablet	Student 2	>500	Urban area	Swedish	Individual	Production	Video rec.	76	And leaves the virtual keyboard on the close button .	1	0	0	0	0	0	0	0	0	0	0	0	0	0	1	0	1	0	0	0	0	0	0	0	1	0	0	0	0	0	1	0	0	0	0	0	0	0
336	336	Tablet	Student 2	>500	Urban area	Swedish	Individual	Consumption	Video rec.	77	The student reads through the text again.	0	0	1	0	0	0	0	1	0	1	0	1	0	0	0	0	0	0	0	0	0	0	0	0	0	0	0	0	0	0	0	0	0	0	0	0	1	0
337	337	Tablet	Student 2	>500	Urban area	Swedish	Individual	Production	Video rec.	78	The student gets help from the teacher to correct the text form the red underlining .	0	0	1	0	0	0	0	0	0	0	0	1	0	0	1	0	1	0	0	0	0	1	0	1	1	0	0	0	0	0	0	0	0	0	0	0	0	0
338	338	Tablet	Student 2	>500	Urban area	Swedish	Individual	Production	Video rec.	79	The student taps the pencil symbol in the bottom right corner to activate .	1	0	0	1	0	0	0	0	0	0	0	0	0	0	1	0	1	0	0	0	0	0	0	0	1	0	0	0	0	0	0	0	0	0	0	0	0	0
339	339	Tablet	Student 2	>500	Urban area	Swedish	Individual	Production	Video rec.	80	And access the virtual keyboard .	1	0	0	1	0	0	0	0	0	0	0	0	0	0	1	0	1	0	0	0	0	0	0	0	1	0	0	0	0	0	0	0	0	0	0	0	0	0
340	340	Tablet	Student 2	>500	Urban area	Swedish	Individual	Production	Video rec.	81	The student applies the word suggestion on the top of the virtual keyboards word prediction toolbar .	1	0	0	0	0	0	0	0	0	0	0	0	0	1	1	0	1	0	0	0	0	0	0	1	1	0	0	0	0	1	0	0	0	0	0	0	0	1
341	341	Tablet	Student 2	>500	Urban area	Swedish	Individual	Production	Video rec.	82	To correct the red underlined incorrect spelling .	0	0	0	0	0	0	0	0	0	0	0	1	0	0	1	0	1	0	0	0	0	0	0	1	1	0	0	0	0	1	0	0	0	0	0	0	0	0
342	342	Tablet	Student 2	>500	Urban area	Swedish	Individual	Production	Video rec.	83	The student corrects word by positioning the cursor in the text by long-press .	0	0	1	1	0	0	0	0	0	0	0	1	0	1	1	0	1	0	0	0	0	0	0	1	1	0	0	0	0	0	1	0	0	0	0	0	0	0
343	343	Tablet	Student 2	>500	Urban area	Swedish	Individual	Production	Video rec.	84	To fix it and correct incorrect words by using the back button and the letter buttons .	0	0	0	1	0	0	0	0	0	0	0	0	0	0	1	0	1	0	0	0	0	0	0	1	1	0	0	0	0	0	1	0	0	0	0	0	0	0
344	344	Tablet	Student 2	>500	Urban area	Swedish	Individual	Production	Video rec.	85	The student discusses with the teacher around the text .	0	0	1	0	0	0	0	0	0	0	0	1	0	0	0	0	0	0	0	0	0	1	0	0	0	0	0	0	0	0	0	0	0	0	0	0	1	0
345	345	Tablet	Student 2	>500	Urban area	Swedish	Individual	Production	Video rec.	86	The student swipes down the contr. center to adjust the music on Spotify shortcut via the forward arrow button .	1	0	0	0	1	0	1	0	0	0	0	0	0	0	1	0	1	0	0	0	0	0	0	0	1	0	0	0	0	0	1	0	0	0	0	0	1	0
346	346	Tablet	Student 2	>500	Urban area	Mixed subjects	Individual	Consumption	Interview	1	I think she has prepared it [the lesson] well.	0	0	0	0	0	0	0	0	0	0	0	0	0	0	0	0	0	0	0	0	0	0	0	0	0	0	0	0	0	0	0	0	0	0	0	0	1	0
347	347	Tablet	Student 2	>500	Urban area	Mixed subjects	Individual	Consumption	Interview	2	She kind of always takes the right place, and she explains to us well for example.	0	0	0	0	0	0	0	0	0	0	0	0	0	0	0	0	0	0	0	0	0	0	0	0	0	0	0	0	0	0	0	0	0	0	0	0	1	0
348	348	Tablet	Student 2	>500	Urban area	Mixed subjects	Individual	Consumption	Interview	3	She explains very clearly so that it stays in my brain yes, she gives us tips.	0	0	0	0	0	0	0	1	0	0	0	0	0	0	0	0	0	0	0	0	0	0	0	0	0	0	0	0	0	0	0	0	0	0	0	0	1	0
349	349	Tablet	Student 2	>500	Urban area	Mixed subjects	Individual	Production	Interview	4	In the beginning then we would open a document [Google documents] and do what she showed now and in the middle of the lesson .	0	0	0	1	0	0	1	0	0	0	0	0	0	0	0	0	1	0	0	0	0	0	0	0	0	1	0	0	0	0	0	0	0	0	0	0	1	0
350	350	Tablet	Student 2	>500	Urban area	Mixed subjects	Individual	Production	Interview	5	Then you have written a bit and then at the end you were about half done, so..	0	0	1	0	0	0	0	0	0	0	0	1	0	0	0	0	0	0	0	0	0	1	0	0	0	0	0	0	0	0	0	0	0	0	0	0	0	0
351	351	Tablet	Student 2	>500	Urban area	Mixed subjects	Individual	Production	Interview	6	I have a hard clarifying things you only finish first in the lesson .	0	0	0	0	0	0	0	0	0	0	0	0	0	0	0	0	0	0	0	0	0	0	0	0	0	0	0	0	0	0	0	0	0	0	0	0	1	0
352	352	Tablet	Student 2	>500	Urban area	Mixed subjects	Individual	Production	Interview	7	I first went into [Google document and write . And I thought I used it pretty well.	0	0	1	0	0	0	1	0	0	0	0	1	0	0	0	0	0	0	0	0	0	1	0	0	0	1	0	0	0	0	0	0	0	0	0	0	0	0
353	353	Tablet	Student 2	>500	Urban area	Mixed subjects	Individual	Production	Interview	8	I write a lot I used a tablet .	0	0	1	0	0	0	0	0	1	0	0	1	0	0	0	0	0	0	0	0	0	1	0	0	0	0	0	0	0	0	0	0	0	0	0	0	0	0
354	354	Tablet	Student 2	>500	Urban area	Mixed subjects	Individual	Production	Interview	9	I went to Spotify , Google Classroom .	0	0	0	0	0	0	1	0	0	0	0	0	0	0	0	0	0	0	0	0	0	0	0	0	0	1	0	0	0	0	0	0	0	0	0	0	0	0
355	355	Tablet	Student 2	>500	Urban area	Mixed subjects	Individual	Production	Interview	10	I do not think there is such a huge difference because at science we have used because we would write about nebulae and such, and supernovae.	0	0	1	0	0	0	0	0	0	0	0	1	0	0	0	0	0	0	0	0	0	1	0	0	0	0	1	1	0	0	0	0	0	0	0	0	1	0
356	356	Tablet	Student 2	>500	Urban area	Mixed subjects	Individual	Production	Interview	11	I do not think there is such a huge difference. We use like..	0	0	0	0	0	0	0	0	0	0	0	0	0	0	0	0	0	0	0	0	0	0	0	0	0	0	0	0	0	0	0	0	0	0	0	0	0	0
357	357	Tablet	Student 2	>500	Urban area	Mixed subjects	Individual	Production	Interview	12	Well, in sloyd there is one thing, because in the end when we have done it, we have to write down what we have done on the Slojdportfolio.nu .	0	1	1	0	0	0	1	0	0	0	0	1	0	0	0	0	0	0	0	0	0	1	0	0	0	0	1	0	0	0	0	0	0	0	1	0	1	0
358	358	Tablet	Student 2	>500	Urban area	Mixed subjects	Individual	Production	Interview	13	It is a website .	0	0	0	0	0	0	1	0	0	0	0	0	0	0	0	0	0	0	0	0	1	0	0	0	0	0	0	0	0	0	0	0	0	0	0	0	0	0
359	359	Tablet	Student 2	>500	Urban area	Mixed subjects	Individual	Production	Interview	14	Sloyd .	0	0	0	0	0	0	0	0	0	0	0	0	0	0	0	0	0	0	0	0	0	0	0	0	0	0	1	0	0	0	0	0	0	0	1	0	1	0
360	360	Tablet	Student 2	>500	Urban area	Mixed subjects	Individual	Production	Interview	15	English and math .	0	0	0	0	0	0	0	0	0	0	0	0	0	0	0	0	0	0	1	0	0	0	0	0	0	0	1	0	0	0	0	0	1	0	0	0	1	0
361	361	Tablet	Student 2	>500	Urban area	Mixed subjects	Individual	Production	Interview	16	Eee, in science we usually do not use it in but it is in science so you can.	0	0	0	0	0	0	0	0	0	0	0	0	0	0	0	0	0	0	0	0	0	0	0	0	0	0	1	1	0	0	0	0	0	0	0	0	1	0
362	362	Tablet	Student 2	>500	Urban area	Mixed subjects	Individual	Production	Interview	17	No, it does not happen that often actually.	0	0	0	0	0	0	1	0	0	0	0	0	0	0	0	0	0	0	0	0	1	0	0	0	0	0	0	0	0	0	0	0	0	0	0	0	0	0
363	363	Tablet	Student 2	>500	Urban area	Mixed subjects	Individual	Production	Interview	18	It can be NE.se .	0	0	0	0	0	0	1	0	0	0	0	0	0	0	0	0	0	0	0	0	0	0	0	0	0	1	0	0	0	0	0	0	0	0	0	0	0	0
364	364	Tablet	Student 2	>500	Urban area	Mixed subjects	Individual	Production	Interview	19	We also use document [Google document] and Wikipedia .	0	0	0	0	0	0	1	0	0	0	0	0	0	0	0	0	0	0	0	0	0	0	0	0	0	1	0	0	0	0	0	0	0	0	0	0	0	0
365	365	Tablet	Student 2	>500	Urban area	Mixed subjects	Individual	Production	Interview	20	Yes, very many factual websites.	0	0	0	0	0	0	1	0	0	0	0	0	0	0	0	0	0	0	0	0	1	0	0	0	0	0	0	0	0	0	0	0	0	0	0	0	0	0
366	366	Tablet	Student 2	>500	Urban area	Mixed subjects	Individual	Production	Interview	21	Yes, or so. Did you mean Swedish ?	0	0	0	0	0	0	0	0	0	0	0	0	0	0	0	0	0	0	1	0	0	0	0	0	0	0	1	0	0	0	0	1	0	0	0	0	1	0
367	367	Tablet	Student 2	>500	Urban area	Mixed subjects	Individual	Consumption	Interview	22	So then..so I can not really choose.	0	0	0	0	0	0	0	0	0	0	0	0	0	0	0	0	0	0	0	0	0	0	0	0	0	0	0	0	0	0	0	0	0	0	0	0	0	0
368	368	Tablet	Student 2	>500	Urban area	Mixed subjects	Individual	Consumption	Interview	23	Because I have to take Google documents .	0	0	0	0	0	0	1	0	0	0	0	0	0	0	0	0	0	0	0	0	0	0	0	0	0	1	0	0	0	0	0	0	0	0	0	0	0	0
369	369	Tablet	Student 2	>500	Urban area	Mixed subjects	Individual	Consumption	Interview	24	I do not know if there are any others.	0	0	0	0	0	0	0	0	0	0	0	0	0	0	0	0	0	0	0	0	0	0	0	0	0	0	0	0	0	0	0	0	0	0	0	0	0	0
370	370	Tablet	Student 2	>500	Urban area	Mixed subjects	Individual	Consumption	Interview	25	Yes, I probably would have gotten it, but I do not have Google documents on my Smartphone .	0	0	0	0	0	0	1	0	0	0	0	0	0	0	0	0	0	0	0	0	0	0	0	0	0	1	0	0	0	0	0	0	0	0	0	1	0	0
371	371	Tablet	Student 2	>500	Urban area	Mixed subjects	Individual	Production	Interview	26	Yes, so. On Mondays we write down how we had it during the weekend.	0	0	1	0	0	0	0	0	0	0	0	1	0	0	0	0	0	0	0	0	0	1	0	0	0	0	0	0	0	0	0	0	0	0	0	0	0	0
372	372	Tablet	Student 2	>500	Urban area	Mixed subjects	Individual	Production	Interview	27	No, we write down the week what we have for exercise and stuff.	0	0	1	0	0	0	0	0	0	0	0	1	0	0	0	0	0	0	0	0	0	1	0	0	0	0	0	0	0	0	0	0	0	0	0	0	0	0
373	373	Tablet	Student 2	>500	Urban area	Mixed subjects	Individual	Production	Interview	28	Then we can take the smartphones and write them down.	0	0	1	0	0	0	0	0	0	0	0	1	0	0	0	0	0	0	0	0	0	1	0	0	0	0	0	0	0	0	0	0	0	0	0	1	0	0
374	374	Tablet	Student 2	>500	Urban area	Mixed subjects	Individual	Consumption	Interview	29	I thought it [Swedish lesson] worked well.	0	0	0	0	0	0	0	0	0	0	0	0	0	0	0	0	0	0	1	0	0	0	0	0	0	0	1	0	0	0	0	1	0	0	0	0	1	0
375	375	Tablet	Student 2	>500	Urban area	Mixed subjects	Individual	Production	Interview	30	So, the result was good because you can write things down and so on.	0	0	1	0	0	0	0	0	0	0	0	1	0	0	0	0	0	0	0	0	0	1	0	0	0	0	0	0	0	0	0	0	0	0	0	0	0	0
376	376	Tablet	Student 2	>500	Urban area	Mixed subjects	Individual	Production	Interview	31	And I like technology and those subjects and stuff.	0	0	0	0	0	1	1	0	0	0	0	0	0	0	0	0	0	0	0	0	1	0	0	0	0	0	1	0	0	0	0	0	0	0	0	0	1	0
377	377	Tablet	Student 2	>500	Urban area	Mixed subjects	Individual	Consumption	Interview	32	So, I thought it [tablet , Google documents , and Google classroom helped me.	0	0	0	0	0	0	1	0	1	0	0	0	0	0	0	0	0	0	0	0	0	0	0	0	0	1	0	0	0	0	0	0	0	0	0	0	0	0
378	378	Tablet	Student 2	>500	Urban area	Mixed subjects	Individual	Consumption	Interview	33	Because occasionally when you spell it wrong, it becomes red underlined underneath.	0	0	0	0	0	0	0	0	0	0	0	1	0	0	1	0	0	0	0	0	0	0	0	0	1	0	0	0	0	1	0	0	0	0	0	0	0	0
379	379	Tablet	Student 2	>500	Urban area	Mixed subjects	Individual	Consumption	Interview	34	S: Google documents. Google Classroom I also think is very good.	0	0	0	0	0	0	1	0	0	0	0	0	0	0	0	0	0	0	0	0	0	0	0	0	0	1	0	0	0	0	0	0	0	0	0	0	0	0
380	380	Tablet	Student 2	>500	Urban area	Mixed subjects	Individual	Production	Interview	35	What we use. So, I've been thinking a lot about laptops and stuff.	0	0	0	0	0	0	0	0	0	0	0	0	0	0	0	1	0	0	0	0	0	0	0	0	0	0	0	0	0	0	0	0	0	0	0	0	0	0
381	381	Tablet	Student 2	>500	Urban area	Mixed subjects	Individual	Production	Interview	36	It would have been nice if we had had this in this school.	0	0	0	0	0	0	0	0	0	0	0	0	0	0	0	0	0	0	0	0	0	0	0	0	0	0	0	0	0	0	0	0	0	0	0	0	0	0
382	382	Tablet	Student 2	>500	Urban area	Mixed subjects	Individual	Production	Interview	37	Because at my previous school, in the fourth grade, we would get laptops there and my friends have got that now.	0	0	0	0	0	0	0	0	0	0	0	0	0	0	0	1	0	0	0	0	0	0	0	0	0	0	0	0	0	0	0	0	0	0	0	0	0	0
383	383	Tablet	Student 2	>500	Urban area	Mixed subjects	Individual	Production	Interview	38	But I would change school, so they have laptops there.	0	0	0	0	0	0	0	0	0	0	0	0	0	0	0	1	0	0	0	0	0	0	0	0	0	0	0	0	0	0	0	0	0	0	0	0	0	0
384	384	Tablet	Student 2	>500	Urban area	Mixed subjects	Individual	Production	Interview	39	Yes, I use the tablet e.g. to listen to music and, yes, Google documents , write things down. And stuff	0	0	1	0	0	0	1	1	1	1	0	1	0	0	0	0	0	0	0	0	0	1	0	0	0	1	0	0	0	0	0	0	0	0	0	0	1	0
385	385	Tablet	Student 2	>500	Urban area	Mixed subjects	Individual	Production	Interview	40	I mostly use Google documents to write down in Swedish and such.	0	0	1	0	0	0	1	0	0	0	0	1	0	0	0	0	0	0	1	0	0	1	0	0	0	1	1	0	0	0	0	1	0	0	0	0	1	0
386	386	Tablet	Student 2	>500	Urban area	Mixed subjects	Individual	Consumption	Interview	41	I think it's going well. It is better than with a Smartphone because they have very small buttons .	1	0	0	0	0	0	0	0	0	0	0	0	0	0	1	0	0	0	0	0	0	0	0	0	1	0	0	0	0	0	0	0	0	0	0	1	0	1
387	387	Tablet	Student 2	>500	Urban area	Mixed subjects	Individual	Production	Interview	42	The tablet is quite large and its buttons , e.g. when writing things, are quite large [sem.res. ].	1	0	1	0	0	0	0	0	1	0	0	1	0	0	1	0	0	0	0	0	0	1	0	0	1	0	0	0	0	0	0	0	0	0	0	0	0	1
388	388	Tablet	Student 2	>500	Urban area	Mixed subjects	Individual	Consumption	Interview	43	Yes, and you can visibly see it too [on the monitor] .	0	0	0	0	0	1	0	0	0	0	0	0	0	0	0	0	0	0	0	0	0	0	0	0	0	0	0	0	0	0	0	0	0	0	0	0	0	1
389	389	Tablet	Student 2	>500	Urban area	Mixed subjects	Individual	Production	Interview	44	I would like to have a laptop to write on because I think it's nice.	0	0	1	0	0	0	0	0	0	0	0	1	0	0	0	1	0	0	0	0	0	1	0	0	0	0	0	0	0	0	0	0	0	0	0	0	0	0
390	390	Tablet	Student 2	>500	Urban area	Mixed subjects	Individual	Production	Interview	45	It's [laptop] larger and it's like that,	0	0	0	0	0	0	0	0	0	0	0	0	0	0	1	1	0	0	0	0	0	0	0	0	0	0	0	0	0	0	0	0	0	0	0	0	0	1
391	391	Tablet	Student 2	>500	Urban area	Mixed subjects	Individual	Production	Interview	46	that is, to tap the [tablet] for yes... it.. and then I think it's nice to click on real tangents .	0	0	0	1	0	0	0	0	1	0	0	0	0	0	1	0	1	0	0	0	0	0	0	0	0	0	0	0	0	0	0	0	0	1	0	0	0	0
392	392	Tablet	Student 2	>500	Urban area	Mixed subjects	Individual	Consumption	Interview	47	So, it's more that they [tangents] are close to each other and occasionally.	0	0	0	0	0	0	0	0	0	0	0	0	0	0	1	0	0	0	0	0	0	0	0	0	0	0	0	0	0	0	0	0	0	1	0	0	0	0
393	393	Tablet	Student 2	>500	Urban area	Mixed subjects	Individual	Consumption	Interview	48	There is a place real tangent where you can make capital letters and so on.	0	0	0	0	0	0	0	0	0	0	0	0	0	0	1	0	0	0	0	0	0	0	0	0	0	0	0	0	0	0	0	0	0	1	0	0	0	1
394	394	Tablet	Student 2	>500	Urban area	Mixed subjects	Individual	Consumption	Interview	49	And I think it is very noisy because when you write A or 1 that is left.	0	0	1	0	0	0	0	0	0	0	0	1	0	0	0	0	0	0	0	0	0	1	0	0	0	0	0	0	0	0	0	0	0	0	0	0	0	0
395	395	Tablet	Student 2	>500	Urban area	Mixed subjects	Individual	Consumption	Interview	50	Then occasionally you press it and it is very noisy.	0	0	0	1	0	0	0	0	0	0	0	0	0	0	0	0	1	0	0	0	0	0	0	0	0	0	0	0	0	0	0	0	0	0	0	0	0	0
396	396	Tablet	Student 2	>500	Urban area	Mixed subjects	Individual	Production	Interview	51	No, mostly that I do not verify when I write .	0	0	1	0	0	0	0	0	0	0	0	1	0	0	0	0	1	0	0	0	0	1	0	0	0	0	0	0	0	0	1	0	0	0	0	0	0	0
397	397	Tablet	Student 2	>500	Urban area	Mixed subjects	Individual	Production	Interview	52	I know that kind of thing by heart.	0	0	0	0	0	0	0	0	0	0	0	0	0	0	0	0	0	0	0	0	0	0	0	0	0	0	0	0	0	0	0	0	0	0	0	0	0	0
398	398	Tablet	Student 2	>500	Urban area	Mixed subjects	Individual	Production	Interview	53	Yes, [write] with thumbs most.	0	0	1	0	0	0	0	0	0	0	0	1	0	0	0	0	0	0	0	0	0	1	0	0	0	0	0	0	0	0	0	0	0	0	0	0	0	0
399	399	Tablet	Student 2	>500	Urban area	Mixed subjects	Individual	Production	Interview	54	Because you e.g. asked how I got it.	0	0	0	0	0	0	0	0	0	0	0	0	0	0	0	0	0	0	0	0	0	0	0	0	0	0	0	0	0	0	0	0	0	0	0	0	0	0
400	400	Tablet	Student 2	>500	Urban area	Mixed subjects	Individual	Production	Interview	55	It was mostly to change, because I can play-in things that happen on the tablet . .	0	0	0	1	0	0	0	0	1	0	0	0	0	0	0	0	1	0	0	0	0	0	0	0	0	0	0	0	0	0	0	0	0	0	0	0	0	0
401	401	Tablet	Student 2	>500	Urban area	Mixed subjects	Individual	Production	Interview	56	Emmm... and then I can resolve things, by correcting where it is red underlined .	0	0	0	0	0	0	0	0	0	0	0	0	0	0	1	0	1	0	0	0	0	0	0	1	1	0	0	0	0	1	0	0	0	0	0	0	0	0
402	402	Tablet	Student 2	>500	Urban area	Mixed subjects	Individual	Production	Interview	57	Or at the virtual keyboard there a little [Suggestion] above.	1	0	0	0	0	0	0	0	0	0	0	0	0	0	1	0	0	0	0	0	0	0	0	0	1	0	0	0	0	0	0	0	0	0	0	0	0	1
403	403	Tablet	Student 2	>500	Urban area	Mixed subjects	Individual	Production	Interview	58	Yep, I use double click to get to something quickly.	0	0	0	1	0	0	0	0	0	0	0	0	0	0	0	0	1	0	0	0	0	0	0	0	0	0	0	0	0	0	0	0	0	0	0	0	0	0
404	404	Tablet	Student 2	>500	Urban area	Mixed subjects	Individual	Production	Interview	59	Mmmm... I also use the virtual keyboard to type things.	1	0	0	1	0	0	0	0	0	0	0	0	0	0	1	0	1	0	0	0	0	0	0	0	1	0	0	0	0	0	0	0	0	0	0	0	0	0
405	405	Tablet	Student 2	>500	Urban area	Mixed subjects	Individual	Production	Interview	60	I use a lot of things that are hard to keep track of.	0	0	0	0	0	0	0	0	0	0	0	0	0	0	0	0	0	0	0	0	0	0	0	0	0	0	0	0	0	0	0	0	0	0	0	0	0	0
406	406	Tablet	Student 2	>500	Urban area	Mixed subjects	Individual	Production	Interview	61	Occasionally I verify the clock .	0	0	0	0	0	0	0	0	0	0	0	0	0	1	1	0	1	0	0	0	0	0	0	0	1	0	0	0	0	0	1	0	0	0	0	0	0	0
407	407	Tablet	Student 2	>500	Urban area	Mixed subjects	Individual	Production	Interview	62	I swipe up and swipe down to adjust music .	0	0	0	0	0	0	0	0	0	0	0	0	0	0	0	0	1	0	0	0	0	0	0	0	0	0	0	0	0	0	1	0	0	0	0	0	1	0
408	408	Tablet	Student 2	>500	Urban area	Mixed subjects	Individual	Production	Interview	63	Corrects writing by tapping a the backspac button .	1	0	1	1	0	0	0	0	0	0	0	1	0	0	1	0	1	0	0	0	0	1	0	1	1	0	0	0	0	0	0	0	0	0	0	0	0	0
409	409	Tablet	Student 2	>500	Urban area	Mixed subjects	Individual	Production	Interview	64	To write different things.	0	0	1	0	0	0	0	0	0	0	0	1	0	0	0	0	0	0	0	0	0	1	0	0	0	0	0	0	0	0	0	0	0	0	0	0	0	0
410	410	Tablet	Student 2	>500	Urban area	Mixed subjects	Individual	Production	Interview	65	And because it would be right and to adjust music to be able to listen to something that I think is nice to listen to.	0	0	0	0	0	0	0	1	0	1	0	0	0	0	0	0	1	0	0	0	0	0	0	0	0	0	0	0	0	0	1	0	0	0	0	0	0	0
411	411	Tablet	Student 2	>500	Urban area	Mixed subjects	Individual	Production	Interview	66	Me, for it to be exciting and cool.	0	0	0	0	0	0	0	0	0	0	0	0	0	0	0	0	0	0	0	0	0	0	0	0	0	0	0	0	0	0	0	0	0	0	0	0	0	0
412	412	Tablet	Student 2	>500	Urban area	Mixed subjects	Individual	Consumption	Interview	67	I did it so that I could, so that it would be right, so that it became exactly the Google document she wanted.	0	0	0	0	0	0	1	0	0	0	0	0	0	0	0	0	0	0	0	0	0	0	0	0	0	1	0	0	0	0	0	0	0	0	0	0	0	0
413	413	Tablet	Student 2	>500	Urban area	Mixed subjects	Individual	Consumption	Interview	68	To, e.g. when we would access Google classroom and then there..	0	0	0	1	0	0	1	0	0	0	0	0	0	0	0	0	1	0	0	0	0	0	0	0	0	0	0	0	0	0	0	0	0	0	0	0	0	0
414	414	Tablet	Student 2	>500	Urban area	Mixed subjects	Individual	Consumption	Interview	69	We do it so that it will remain there, among other things, to be able to arrive at the right [Google document] .	0	0	0	0	0	0	1	0	0	0	0	0	0	0	0	0	0	0	0	0	0	0	0	0	0	1	0	0	0	0	0	0	0	0	0	0	0	0
415	415	Tablet	Student 2	>500	Urban area	Mixed subjects	Individual	Consumption	Interview	70	Then I had to access Google classroom and verify .	0	0	0	1	0	0	1	0	0	0	0	0	0	0	0	0	1	0	0	0	0	0	0	0	0	0	0	0	0	0	1	0	0	0	0	0	0	0
416	416	Tablet	Student 2	>500	Urban area	Mixed subjects	Individual	Production	Interview	71	To find .	0	0	0	0	0	0	0	0	0	0	0	0	0	0	0	0	1	0	0	0	0	0	0	0	0	0	0	0	0	0	1	0	0	0	0	0	0	0
417	417	Tablet	Student 2	>500	Urban area	Mixed subjects	Individual	Production	Interview	72	Yes, for e.g. when we access Google classroom .	0	0	0	1	0	0	1	0	0	0	0	0	0	0	0	0	1	0	0	0	0	0	0	0	0	0	0	0	0	0	0	0	0	0	0	0	0	0
418	418	Tablet	Student 2	>500	Urban area	Mixed subjects	Individual	Production	Interview	73	Because it is important for the others so to organize .	0	0	0	0	0	0	0	0	0	0	0	0	0	0	0	0	1	0	0	0	0	0	0	0	0	0	0	0	0	0	1	0	0	0	0	0	0	0
419	419	Tablet	Student 2	>500	Urban area	Mixed subjects	Individual	Consumption	Interview	74	and there are some in the class who need music so they can listen to what they will otherwise flip out.	0	0	0	0	0	0	0	1	0	1	0	0	0	0	0	0	0	0	0	0	0	0	0	0	0	0	1	0	0	0	0	0	0	0	0	0	1	0
420	420	Tablet	Student 2	>500	Urban area	Mixed subjects	Individual	Production	Interview	75	Well, on a tablet there is a round circle , where I can like, e.g. if there is someone if I am going to play-in my voice e.g.	1	0	0	1	0	0	0	0	1	0	1	1	0	0	1	0	1	0	0	0	0	0	0	0	1	0	0	0	0	0	0	0	0	0	0	0	0	0
421	421	Tablet	Student 2	>500	Urban area	Mixed subjects	Individual	Production	Interview	76	I can just press there and then I talk and the tablet takes it in [play-in] .	0	0	1	1	0	0	0	0	1	0	1	1	0	0	0	0	1	0	0	0	0	1	0	0	0	0	0	0	0	0	0	0	0	0	0	0	0	0
422	422	Tablet	Student 2	>500	Urban area	Mixed subjects	Individual	Production	Interview	77	And then I can just leave and then it is saved.	0	0	0	0	0	0	0	0	0	0	0	0	0	0	0	0	1	0	0	0	0	0	0	0	0	0	0	0	0	0	1	0	0	0	0	0	0	0
423	423	Tablet	Student 2	>500	Urban area	Mixed subjects	Collaborative	Production	Interview	78	No, before on the science I used it to be able to play-in my experiment.	0	0	0	1	0	0	0	0	0	0	0	0	0	0	0	0	1	0	0	0	0	0	0	0	0	0	1	1	0	0	0	0	0	0	0	0	1	0
424	424	Tablet	Student 2	>500	Urban area	Mixed subjects	Collaborative	Production	Interview	79	To play-in my voice what I do and then I have a video [moving images] [sem prop] for it.	0	0	0	1	0	0	0	0	0	0	1	1	0	0	0	0	1	0	0	0	0	0	0	0	0	0	0	0	0	0	0	0	0	0	0	0	0	1
425	425	Tablet	Student 2	>500	Urban area	Mixed subjects	Collaborative	Production	Interview	80	We could commit some videos to see if we could go to Stockholm.	0	0	0	1	0	0	1	0	0	0	0	0	0	0	0	0	1	1	0	0	0	0	0	0	0	0	0	0	0	0	0	0	0	0	0	0	0	0
426	426	Tablet	Student 2	>500	Urban area	Mixed subjects	Collaborative	Production	Interview	81	The one who has the best experiment .	0	0	0	0	0	0	0	0	0	0	0	0	0	0	0	0	0	0	0	0	0	0	0	0	0	0	0	1	0	0	0	0	0	0	0	0	0	0
427	427	Tablet	Student 2	>500	Urban area	Mixed subjects	Individual	Production	Interview	82	I used them [emojis] to make it a little more fun.	0	0	0	0	0	0	0	0	0	0	0	0	0	0	0	0	0	0	0	0	0	0	0	0	0	0	0	0	0	0	0	0	0	0	0	0	0	1
428	428	Tablet	Student 2	>500	Urban area	Mixed subjects	Individual	Production	Interview	83	There are only some I use. For example. i used happy because it's pretty fun.	0	0	0	0	0	0	0	0	0	0	0	0	0	0	0	0	0	0	0	0	0	0	0	0	0	0	0	0	0	0	0	0	0	0	0	0	0	0
429	429	Tablet	Student 2	>500	Urban area	Mixed subjects	Individual	Production	Interview	84	Because if I had continued to write , it [space less text] would have gone into the text .	0	0	1	0	0	0	0	0	0	0	0	1	0	0	0	0	0	0	0	0	0	1	0	0	0	0	0	0	0	0	0	0	0	0	0	0	0	1
430	430	Tablet	Student 2	>500	Urban area	Mixed subjects	Individual	Production	Interview	85	And then it would not like chapter three the Svensson family Nils Kalle.	0	0	0	0	0	0	0	0	0	0	0	0	0	0	0	0	0	0	0	0	0	0	0	0	0	0	0	0	0	0	0	0	0	0	0	0	0	0
431	431	Tablet	Student 2	>500	Urban area	Mixed subjects	Individual	Production	Interview	86	So, it does not have to be [Space] but I do not like when it sits together [near] .	0	0	0	0	0	0	0	0	0	0	0	0	0	0	0	0	0	0	0	0	0	0	0	0	0	0	0	0	0	0	0	0	0	0	0	0	0	1
432	432	Tablet	Student 2	>500	Urban area	Mixed subjects	Individual	Production	Interview	87	Because then it [text] just looks weird.	0	0	1	0	0	0	0	0	0	0	0	1	0	0	0	0	0	0	0	0	0	0	0	0	0	0	0	0	0	0	0	0	0	0	0	0	0	0
433	433	Tablet	Student 2	>500	Urban area	Mixed subjects	Individual	Production	Interview	88	And I think most people also think so because then like, it [text] looks better [with spaces] and when you read it it just gets better.	0	0	1	0	0	0	0	1	0	1	0	1	0	0	0	0	0	0	0	0	0	0	0	0	0	0	0	0	0	0	0	0	0	0	0	0	1	1
434	434	Tablet	Student 2	>500	Urban area	Mixed subjects	Individual	Consumption	Interview	89	For it to be spelled correctly .	0	0	0	0	0	0	0	0	0	0	0	1	0	0	0	0	1	0	0	0	0	0	0	1	0	0	0	0	0	0	0	0	0	0	0	0	0	0
435	435	Tablet	Student 2	>500	Urban area	Mixed subjects	Individual	Consumption	Interview	90	And because it is difficult to understand if it is not spelled correctly , so that the teacher can read it.	0	0	0	0	0	0	0	1	0	1	0	1	0	0	0	0	1	0	0	0	0	0	0	1	0	0	0	0	0	0	0	0	0	0	0	0	0	0
436	436	Tablet	Student 2	>500	Urban area	Mixed subjects	Individual	Production	Interview	91	And it's faster [to use the word suggestion] than terminate it.	0	0	0	0	0	0	0	0	0	0	0	0	0	0	0	0	1	0	0	0	0	0	0	0	0	0	0	0	0	0	1	0	0	0	0	0	0	1
437	437	Tablet	Student 2	>500	Urban area	Mixed subjects	Individual	Production	Interview	92	And then you do not know how to spell it.	0	0	0	0	0	0	0	0	0	0	0	1	0	0	0	0	0	0	0	0	0	0	0	0	0	0	0	0	0	0	0	0	0	0	0	0	0	0
438	438	Tablet	Student 2	>500	Urban area	Mixed subjects	Individual	Consumption	Interview	93	I mostly use the predicting thing [word prediction] .	0	0	0	0	0	0	0	0	0	0	0	0	0	1	1	0	0	0	0	0	0	0	0	0	1	0	0	0	0	0	0	0	0	0	0	0	0	0
439	439	Tablet	Student 2	>500	Urban area	Mixed subjects	Individual	Consumption	Interview	94	Yes, e.g. to that star thing [science] , if you wanted to explain what it looked like.	0	0	0	0	0	0	0	0	0	0	0	0	0	0	0	0	0	0	0	0	0	0	0	0	0	0	1	1	0	0	0	0	0	0	0	0	1	0
440	440	Tablet	Student 2	>500	Urban area	Mixed subjects	Individual	Consumption	Interview	95	It is tied to the task , because if you take it in [read, listen] you can get inspiration [to write] .	0	0	1	0	0	0	0	1	0	1	0	1	0	0	0	0	0	0	0	0	0	1	0	0	0	0	0	0	0	0	0	0	0	0	0	0	1	0
441	441	Tablet	Student 2	>500	Urban area	Mixed subjects	Collaborative	Production	Interview	96	Talk to the neighbor often.	0	0	1	0	0	0	0	0	0	0	1	1	0	0	0	0	0	0	0	0	0	1	0	0	0	0	0	0	0	0	0	0	0	0	0	0	0	0
442	442	Tablet	Student 2	>500	Urban area	Mixed subjects	Individual	Production	Interview	97	I do not really know. But I think so. It would take much more time to write on paper.	0	0	1	0	0	0	0	0	0	0	0	1	0	0	1	0	1	0	0	0	0	1	0	0	0	0	0	0	0	0	1	0	0	1	0	0	0	0
443	443	Tablet	Student 2	>500	Urban area	Swedish	Individual	Production	Observation	1	Swedish lesson	0	0	0	0	0	0	0	0	0	0	0	0	0	0	0	0	0	0	1	0	0	0	0	0	0	0	1	0	0	0	0	1	0	0	0	0	1	0
444	444	Tablet	Student 2	>500	Urban area	Swedish	Individual	Consumption	Observation	2	Tablet , Google classroom , Google Docs , Headphones	0	0	0	0	0	1	1	0	1	0	0	0	0	0	0	0	0	0	0	0	0	0	0	0	0	0	0	0	0	0	0	0	0	0	0	0	0	0
445	445	Tablet	Student 2	>500	Urban area	Swedish	Individual	Production	Observation	3	Adjust name to change name, tap with your fingers on different likes,	0	0	0	1	0	0	0	0	0	0	0	0	0	0	0	0	1	0	0	0	0	0	0	0	0	0	0	0	0	0	1	0	0	0	0	0	0	0
446	446	Tablet	Student 2	>500	Urban area	Swedish	Individual	Consumption	Observation	4	Forward arrow button to Google document recent apps , Google document .	1	0	0	0	1	0	1	0	0	0	0	0	0	0	1	0	0	0	0	0	0	0	0	0	1	1	0	0	0	0	0	0	0	0	0	0	0	0
447	447	Tablet	Student 2	>500	Urban area	Swedish	Individual	Production	Observation	5	Write text using the virtual keyboard .	1	0	1	0	0	0	0	0	0	0	0	1	0	0	1	0	0	0	0	0	0	1	0	0	1	0	0	0	0	0	0	0	0	0	0	0	0	0
448	448	Tablet	Student 2	>500	Urban area	Swedish	Individual	Production	Observation	6	Tap on the monitor to position the cursor .	0	0	0	1	0	1	0	0	0	0	0	0	0	1	1	0	1	0	0	0	0	0	0	0	1	0	0	0	0	0	1	0	0	0	0	0	0	0
449	449	Tablet	Student 2	>500	Urban area	Swedish	Individual	Production	Observation	7	tap up another document page quickly (?).	0	0	0	1	1	0	0	0	0	0	0	0	0	0	1	0	1	0	0	0	0	0	0	0	1	0	0	0	0	0	0	0	0	0	0	0	0	0
450	450	Tablet	Student 2	>500	Urban area	Swedish	Individual	Consumption	Observation	8	Red underlining , ballon symbol comes up for word suggestion form an upper middle part of the virtual keyboard where the student occasionally applies .	1	0	0	0	0	0	0	0	0	0	0	0	0	0	1	0	1	0	0	0	0	0	0	1	1	0	0	0	0	0	0	0	0	0	0	0	0	1
451	451	Tablet	Student 2	>500	Urban area	Swedish	Individual	Production	Observation	9	Uses the back button to erase words.	1	0	0	0	0	0	0	0	0	0	0	0	0	0	1	0	1	0	0	0	0	1	0	1	1	0	0	0	0	0	0	0	0	0	0	0	0	0
452	452	Tablet	Student 2	>500	Urban area	Swedish	Individual	Production	Observation	10	Scrolls with the thumb on the monitor .	0	0	0	0	0	1	0	0	0	0	0	0	0	0	0	0	1	0	0	0	0	0	0	0	0	0	0	0	0	0	1	0	0	0	0	0	0	0
453	453	Tablet	Student 2	>500	Urban area	Swedish	Individual	Production	Observation	11	Swipes up in the text to by touching with the finger there, brings up the contr. center play function to adjust music .	0	0	1	0	1	0	0	0	0	0	0	1	0	0	1	0	1	0	0	0	0	0	0	0	1	0	0	0	0	0	1	0	0	0	0	0	1	0
454	454	Tablet	Student 2	>500	Urban area	Swedish	Individual	Production	Observation	12	The student taps outside it to exit it, scrolls with the thumb.	0	0	0	1	0	0	0	0	0	0	0	0	0	0	0	0	1	0	0	0	0	0	0	0	0	0	0	0	0	0	1	0	0	0	0	0	0	0
455	455	Tablet	Student 2	>500	Urban area	Swedish	Individual	Production	Observation	13	The student exit the virtual keyboard with function for this at the top of the toolbar .	1	0	0	1	0	0	0	0	0	0	0	0	0	0	1	0	1	0	0	0	0	0	0	0	1	0	0	0	0	1	0	0	0	0	0	0	0	0
456	456	Tablet	Student 2	>500	Urban area	Swedish	Individual	Production	Observation	14	May position the cursor in the text to correct with the help of a word suggestion .	0	0	1	0	0	0	0	0	0	0	0	1	0	1	1	0	1	0	0	0	0	1	0	1	1	0	0	0	0	0	1	0	0	0	0	0	0	1
457	457	Tablet	Student 2	>500	Urban area	Swedish	Individual	Consumption	Observation	15	Read his own text .	0	0	1	0	0	0	0	1	0	1	0	1	0	0	0	0	0	0	0	0	0	0	0	0	0	0	0	0	0	0	0	0	0	0	0	0	1	0
458	458	Tablet	Student 2	>500	Urban area	Swedish	Individual	Production	Observation	16	Talk to his teacher about the task and how he should proceed.	0	0	1	0	0	0	0	1	0	0	1	1	0	0	0	0	0	0	0	0	0	1	0	0	0	0	0	0	0	0	0	0	0	0	0	0	1	0
459	459	Tablet	Student 2	>500	Urban area	Swedish	Individual	Production	Observation	17	Swedish , writing assignment .	0	0	1	0	0	0	0	1	0	0	0	1	0	0	0	0	0	0	1	0	0	1	0	0	0	0	1	0	0	0	0	1	0	0	0	0	1	0
460	460	Tablet	Student 2	>500	Urban area	Swedish	Individual	Consumption	Observation	18	Google classroom , taps to open google document , goes through various functions how to deal with renaming that name of the document.	0	0	0	1	0	0	1	0	0	0	0	0	0	0	0	0	1	0	0	0	0	0	0	0	0	1	0	0	0	0	0	0	0	0	0	0	0	0
461	461	Tablet	Student 2	>500	Urban area	Swedish	Individual	Production	Observation	19	Students should be allowed to write their own text about family members.	0	0	1	0	0	0	0	0	0	0	0	1	0	0	0	0	0	0	0	0	0	1	0	0	0	0	0	0	0	0	0	0	0	0	0	0	0	0
462	462	Tablet	Student 2	>500	Urban area	Swedish	Individual	Production	Observation	20	Pick people to write more about.	0	0	1	0	0	0	0	0	0	0	0	1	0	0	0	0	0	0	0	0	0	1	0	0	0	0	0	0	0	0	0	0	0	0	0	0	0	0
463	463	Tablet	Student 2	>500	Urban area	Swedish	Individual	Production	Observation	21	Students are allowed to work individually on write the text .	0	0	1	0	0	0	0	0	0	1	0	1	0	0	0	0	0	0	0	0	0	1	0	0	0	0	0	0	0	0	0	0	0	0	0	0	1	0
464	464	Smartphone	Student 3	<200	Remote area	Science	Individual	Consumption	Video rec.	1	The lesson is science , and it is about weather and the sun , meteorology .	0	0	0	0	0	0	0	0	0	0	0	0	0	0	0	0	0	0	0	0	0	0	0	0	0	0	1	1	0	0	0	0	0	0	0	0	1	0
465	465	Smartphone	Student 3	<200	Remote area	Science	Individual	Consumption	Video rec.	2	The students listen to the teachers oral introduction .	0	0	1	0	0	0	0	1	0	1	1	1	0	0	0	0	0	0	0	0	0	0	0	0	0	0	0	0	0	0	0	0	0	0	0	0	1	0
466	466	Smartphone	Student 3	<200	Remote area	Science	Individual	Consumption	Video rec.	3	The students are instructed to use their smartphones to access the Padlet .	0	0	0	1	0	0	1	1	1	0	0	0	0	0	0	0	1	0	0	0	0	1	0	0	0	1	0	0	0	0	0	0	0	0	0	0	1	0
467	467	Smartphone	Student 3	<200	Remote area	Science	Individual	Consumption	Video rec.	4	To write their conceptions around meteorology .	0	0	1	0	0	0	0	0	0	0	0	1	0	0	0	0	0	0	0	0	0	1	0	0	0	0	1	1	0	0	0	0	0	0	0	0	1	0
468	468	Smartphone	Student 3	<200	Remote area	Science	Individual	Production	Video rec.	5	The student holds the smartphone with two arms and manages the smartphone with fingers.	0	0	0	0	0	0	0	0	0	0	0	0	0	0	0	0	0	0	0	0	0	0	0	0	0	0	0	0	0	0	0	0	0	0	0	1	0	0
469	469	Smartphone	Student 3	<200	Remote area	Science	Individual	Production	Video rec.	6	The student swipes left to organize the windows on the home screen .	1	0	0	0	1	0	0	0	0	0	0	0	0	0	1	0	1	0	0	0	0	0	0	0	1	0	0	0	0	0	1	0	0	0	0	0	0	0
470	470	Smartphone	Student 3	<200	Remote area	Science	Individual	Production	Video rec.	7	And then swipes up to access the suggested app, WhatsApp .	0	1	0	1	0	0	1	0	0	0	0	0	0	0	0	0	1	0	0	0	0	0	0	0	0	0	0	0	0	0	1	0	0	0	0	0	0	0
471	471	Smartphone	Student 3	<200	Remote area	Science	Individual	Production	Video rec.	8	The student swipe left and taps the WhatsApp and then taps the designation badge to access the link .	0	1	0	1	1	0	1	0	0	0	0	0	0	0	1	0	1	0	0	0	0	0	0	0	1	0	0	0	0	1	1	0	0	0	0	0	0	0
472	472	Smartphone	Student 3	<200	Remote area	Science	Individual	Production	Video rec.	9	The student taps the link with fingers, and which leads to Padlet .	0	0	0	1	0	0	1	0	0	0	0	0	0	0	1	0	1	0	0	0	0	0	0	0	1	1	0	0	0	1	0	0	0	0	0	0	0	0
473	473	Smartphone	Student 3	<200	Remote area	Science	Individual	Consumption	Video rec.	10	An orange pencil button in Padlet is activated which enables a new note .	1	0	0	1	0	0	1	0	0	0	0	0	0	0	1	0	1	0	0	0	0	1	0	0	1	1	0	0	0	0	0	0	0	0	0	0	0	0
474	474	Smartphone	Student 3	<200	Remote area	Science	Individual	Production	Video rec.	11	A virtual keyboard is autogenerated and the S taps in the script-spacing .	1	0	0	1	0	0	0	0	0	0	0	0	0	0	1	0	1	0	0	0	0	1	0	0	1	0	0	0	0	0	0	0	0	0	0	0	0	0
475	475	Smartphone	Student 3	<200	Remote area	Science	Individual	Production	Video rec.	12	And starts typing on letter buttons with thumbs.	1	0	0	1	0	0	0	0	0	0	0	0	0	0	1	0	1	0	0	0	0	0	0	0	1	0	0	0	0	0	0	0	0	0	0	0	0	0
476	476	Smartphone	Student 3	<200	Remote area	Science	Individual	Production	Video rec.	13	The enter button is used to enclose space between words and backspac to erase text .	1	0	1	0	0	0	0	0	0	0	0	1	0	0	1	0	1	0	0	0	0	1	0	1	1	0	0	0	0	0	0	0	0	0	0	0	0	1
477	477	Smartphone	Student 3	<200	Remote area	Science	Individual	Production	Video rec.	14	The student taps send button to commit the post-it note to the joint notice-board on the Padlet interface.	1	0	0	1	0	0	1	0	0	0	0	0	0	0	1	0	1	0	0	1	0	0	0	0	1	1	0	0	0	0	0	0	0	0	0	0	0	0
478	478	Smartphone	Student 3	<200	Remote area	Science	Individual	Production	Video rec.	15	The student scrolls with thumb on the Padlet interface to view if the post-it note appears.	0	0	0	0	0	0	1	1	0	0	0	0	0	0	1	0	1	0	0	1	0	0	0	0	1	1	0	0	0	0	1	0	0	0	0	0	0	0
479	479	Smartphone	Student 3	<200	Remote area	Science	Individual	Production	Video rec.	16	The student the activte the orange pencil button in the Padlet toolbar to access the writing mode and starts writing .	1	0	1	1	0	0	1	0	0	0	0	1	0	0	1	0	1	0	0	0	0	1	0	0	1	1	0	0	0	1	0	0	0	0	0	0	0	0
480	480	Smartphone	Student 3	<200	Remote area	Science	Individual	Production	Video rec.	17	The virtual keyboard is used to type .	1	0	0	1	0	0	0	0	0	0	0	0	0	0	1	0	1	0	0	0	0	1	0	0	1	0	0	0	0	0	0	0	0	0	0	0	0	0
481	481	Smartphone	Student 3	<200	Remote area	Science	Individual	Consumption	Video rec.	18	The students are going to watch a film regarding the topic , weather , and turns off the smartphones .	0	0	0	1	0	0	1	1	0	1	0	0	0	0	0	0	1	1	0	0	0	0	0	0	0	0	1	1	0	0	0	0	0	0	0	1	1	0
482	482	Smartphone	Student 3	<200	Remote area	Science	Individual	Production	Video rec.	19	The student swipes down on the smartphone to view the contr. center and notifications .	0	0	0	0	1	0	0	1	0	0	0	0	0	0	1	0	1	0	0	1	0	0	0	0	1	0	0	0	0	0	1	0	0	0	0	1	0	0
483	483	Smartphone	Student 3	<200	Remote area	Science	Individual	Production	Video rec.	20	The student swipes left and swipes right on the smartphone to navigate and read the other students comments.	0	0	0	1	0	0	0	1	0	1	0	0	0	0	0	0	1	0	0	0	0	0	0	0	0	0	0	0	0	0	1	0	0	0	0	1	1	0
484	484	Smartphone	Student 3	<200	Remote area	Science	Individual	Production	Video rec.	21	The student taps the recent apps button amongst the screen button to access the recent apps button .	1	0	0	1	0	0	0	0	0	0	0	0	0	0	1	0	1	0	0	0	0	0	0	0	1	0	0	0	0	0	0	0	0	0	0	0	0	0
485	485	Smartphone	Student 3	<200	Remote area	Science	Individual	Production	Video rec.	22	The student swipes up to terminate one page .	0	0	0	0	1	0	0	0	0	0	0	0	0	0	1	0	1	0	0	0	0	0	0	0	1	0	0	0	0	0	1	0	0	0	0	0	0	0
486	486	Smartphone	Student 3	<200	Remote area	Science	Individual	Production	Video rec.	23	Students need to turn off the smartphone .	1	0	0	1	1	0	0	0	0	0	0	0	0	0	1	0	1	0	0	0	0	0	0	0	1	0	0	0	0	0	1	0	0	0	0	1	0	0
487	487	Smartphone	Student 3	<200	Remote area	Science	Individual	Production	Video rec.	24	The student then taps the WhatsApp page and then the back arrow on the screen buttons to navigate to the message record .	1	1	0	1	1	0	1	0	0	0	0	0	0	0	1	0	1	0	0	1	0	0	0	0	1	0	0	0	0	1	0	0	0	0	0	0	0	0
488	488	Smartphone	Student 3	<200	Remote area	Science	Individual	Production	Video rec.	25	The student then selects the recent apps button on the screen buttons again to terminate the WhatsApp window by swiping up .	1	1	0	0	1	0	1	1	0	0	0	0	0	0	1	0	1	0	0	0	0	0	0	0	1	0	0	0	0	0	1	0	0	0	0	0	0	0
489	489	Smartphone	Student 3	<200	Remote area	Science	Individual	Consumption	Video rec.	26	The students get to watch a movie about weather .	0	0	0	0	0	0	1	1	0	1	0	0	0	0	0	0	0	1	0	0	0	0	0	0	0	0	1	1	0	0	0	0	0	0	0	0	1	0
490	490	Smartphone	Student 3	<200	Remote area	Science	Collaborative	Consumption	Video rec.	27	The students are divided into groups and are going to make a PowerPoint on a laptop .	0	0	0	0	0	0	1	0	0	0	0	0	0	0	0	1	0	1	0	0	0	0	0	0	0	0	0	0	0	0	0	0	0	0	0	0	1	0
491	491	Smartphone	Student 3	<200	Remote area	Science	Collaborative	Production	Video rec.	28	The students discuss the text orally .	0	0	1	0	0	0	0	0	0	0	1	1	0	0	0	0	0	0	0	0	0	1	0	0	0	0	0	0	0	0	0	0	0	0	0	0	1	0
492	492	Smartphone	Student 3	<200	Remote area	Science	Collaborative	Production	Video rec.	29	The students direct their gaze at each other and the smartphone .	0	0	0	0	0	0	0	0	0	0	0	1	0	0	0	0	1	0	0	0	0	0	0	0	0	0	0	0	1	0	1	0	0	0	0	1	1	0
493	493	Smartphone	Student 3	<200	Remote area	Science	Collaborative	Production	Video rec.	30	The student accesses a text on the smartphone committed to WhatsApp from the teacher to be used in the assignment .	0	1	1	1	0	0	1	1	0	0	0	1	0	0	0	0	1	0	0	0	0	1	0	0	0	0	0	0	0	0	0	0	0	0	0	1	1	0
494	494	Smartphone	Student 3	<200	Remote area	Science	Collaborative	Production	Video rec.	31	The student accesses the text by the contr. center and by tapping the WhatsApp unit page .	0	1	1	1	1	0	1	0	0	0	0	1	0	0	1	0	1	0	0	0	0	0	0	0	1	0	0	0	0	0	0	0	0	0	0	0	0	0
495	495	Smartphone	Student 3	<200	Remote area	Science	Collaborative	Production	Video rec.	32	The student taps on the Google document in WhatsApp .	0	1	0	1	0	0	1	0	0	0	0	0	0	0	0	0	1	0	0	0	0	0	0	0	0	1	0	0	0	0	0	0	0	0	0	0	0	0
496	496	Smartphone	Student 3	<200	Remote area	Science	Collaborative	Production	Video rec.	33	The students discuss the text orally .	0	0	1	0	0	0	0	0	0	0	1	1	0	0	0	0	0	0	0	0	0	1	0	0	0	0	0	0	0	0	0	0	0	0	0	0	1	0
497	497	Smartphone	Student 3	<200	Remote area	Science	Collaborative	Production	Video rec.	34	The students direct their gaze at each other and the smartphone .	0	0	0	0	0	0	0	0	0	0	0	1	0	0	0	0	1	0	0	0	0	0	0	0	0	0	0	0	1	0	1	0	0	0	0	1	1	0
498	498	Smartphone	Student 3	<200	Remote area	Science	Collaborative	Production	Video rec.	35	The student zoom with two fingers to view the enlarged text and to be able to read .	0	0	1	0	0	0	0	1	0	1	0	1	0	0	0	0	1	0	0	0	0	0	0	1	0	0	0	0	0	0	1	0	0	0	0	0	1	1
499	499	Smartphone	Student 3	<200	Remote area	Science	Collaborative	Production	Video rec.	36	And shift the enlarged text on the monitor to read different parts of it by long-press and dragging it around.	0	0	1	1	0	1	0	1	0	1	0	1	0	0	0	0	1	0	0	0	0	0	0	0	0	0	0	0	0	0	1	0	0	0	0	0	1	1
500	500	Smartphone	Student 3	<200	Remote area	Science	Collaborative	Production	Video rec.	37	The student touches the back arrow button on the smartphone's screen buttons .	1	0	0	0	0	0	0	0	0	0	0	0	0	0	1	0	1	0	0	0	0	0	0	0	1	0	0	0	0	0	1	0	0	0	0	1	0	0
501	501	Smartphone	Student 3	<200	Remote area	Science	Collaborative	Production	Video rec.	38	The student then select the recent apps button .	1	0	0	0	1	0	0	0	0	0	0	0	0	0	1	0	1	0	0	0	0	0	0	0	1	0	0	0	0	0	1	0	0	0	0	0	0	0
502	502	Smartphone	Student 3	<200	Remote area	Science	Collaborative	Production	Video rec.	39	The student then swipes up to terminate the WhatsApp window .	0	1	0	0	1	0	1	0	0	0	0	0	0	0	1	0	1	0	0	0	0	0	0	0	1	0	0	0	0	0	1	0	0	0	0	0	0	0
503	503	Smartphone	Student 3	<200	Remote area	Science	Collaborative	Production	Video rec.	40	The student swipes down to access the contr. center and WhatsApp and taps the WhatsApp message .	0	1	0	1	1	0	1	0	0	0	0	0	0	0	1	0	1	0	0	0	0	0	0	0	1	0	0	0	0	1	1	0	0	0	0	0	0	0
504	504	Smartphone	Student 3	<200	Remote area	Science	Collaborative	Production	Video rec.	41	Thereafter the document page .	0	0	0	0	1	0	0	0	0	0	0	0	0	0	1	0	0	0	0	0	0	0	0	0	1	0	0	0	0	0	0	0	0	0	0	0	0	0
505	505	Smartphone	Student 3	<200	Remote area	Science	Collaborative	Production	Video rec.	42	The student swipes left and swipes right to navigate in the different text activated on the smartphone .	0	0	1	1	0	0	0	0	0	0	0	1	0	0	0	0	1	0	0	0	0	1	0	0	0	0	0	0	0	0	1	0	0	0	0	1	0	0
506	506	Smartphone	Student 3	<200	Remote area	Science	Collaborative	Production	Video rec.	43	The student zooms again to be able to read the enlarged text by using two fingers.	0	0	1	0	0	0	0	1	0	1	0	1	0	0	0	0	1	0	0	0	0	0	0	1	0	0	0	0	0	0	0	0	0	0	0	0	1	0
507	507	Smartphone	Student 3	<200	Remote area	Science	Collaborative	Production	Video rec.	44	While navigating and reading the text the students discuss the content of the PowerPoint slides.	0	0	1	1	0	0	1	1	0	1	0	1	0	0	0	0	1	1	0	0	0	1	0	0	0	0	0	0	0	0	0	0	0	0	0	0	1	0
508	508	Smartphone	Student 3	<200	Remote area	Science	Collaborative	Production	Video rec.	45	The student uses home button on the smartphone screen buttons to access the home screen .	1	0	0	1	0	0	0	0	0	0	0	0	0	0	1	0	1	0	0	0	0	0	0	0	1	0	0	0	0	0	0	0	0	0	0	1	0	0
509	509	Smartphone	Student 3	<200	Remote area	Science	Collaborative	Production	Video rec.	46	And then taps the Notes app icon to access it.	1	0	0	1	0	0	0	0	0	0	0	0	0	0	1	0	1	0	0	0	0	0	0	0	1	0	0	0	0	0	0	0	0	0	0	0	0	0
510	510	Smartphone	Student 3	<200	Remote area	Science	Collaborative	Production	Video rec.	47	The student adds a new notation by tapping the orange plus symbol .	1	0	0	1	0	0	0	0	0	0	0	0	0	0	1	0	1	0	0	0	0	1	0	0	1	0	0	0	0	0	1	0	0	0	0	0	0	0
511	511	Smartphone	Student 3	<200	Remote area	Science	Collaborative	Consumption	Video rec.	48	A new document is retrieved and automatically generates a virtual keyboard .	1	0	0	1	0	0	0	0	0	0	0	0	0	0	1	0	1	0	0	0	0	0	0	0	1	0	0	0	0	0	0	0	0	0	0	0	0	0
512	512	Smartphone	Student 3	<200	Remote area	Science	Collaborative	Production	Video rec.	49	The students discuss the text orally .	0	0	1	0	0	0	0	0	0	0	1	1	0	0	0	0	0	0	0	0	0	1	0	0	0	0	0	0	0	0	0	0	0	0	0	0	1	0
513	513	Smartphone	Student 3	<200	Remote area	Science	Collaborative	Production	Video rec.	50	The students direct their gaze at each other and the smartphone .	0	0	0	0	0	0	0	0	0	0	0	1	0	0	0	0	1	0	0	0	0	0	0	0	0	0	0	0	1	0	1	0	0	0	0	1	1	0
514	514	Smartphone	Student 3	<200	Remote area	Science	Collaborative	Production	Video rec.	51	The student touches the back arrow button on the smartphone's on the screen buttons .	1	1	0	0	1	0	1	1	0	0	0	0	0	0	1	0	1	0	0	0	0	0	0	0	1	0	0	0	0	0	1	0	0	0	0	1	0	0
515	515	Smartphone	Student 3	<200	Remote area	Science	Collaborative	Production	Video rec.	52	The student swipes down to access the contr. center and WhatsApp and selects the WhatsApp message and the Google document .	0	1	0	1	1	0	1	0	0	0	0	0	0	0	1	0	1	0	0	0	0	0	0	0	1	1	0	0	0	0	1	0	0	0	0	0	0	0
516	516	Smartphone	Student 3	<200	Remote area	Science	Collaborative	Production	Video rec.	53	And then selects the recent apps button and then swipes up to terminate the WhatsApp window .	1	1	0	0	1	0	1	0	0	0	0	0	0	0	1	0	1	0	0	0	0	0	0	0	1	0	0	0	0	0	1	0	0	0	0	0	0	0
517	517	Smartphone	Student 3	<200	Remote area	Science	Collaborative	Production	Video rec.	54	The student zoom with two fingers to view the enlarged text and to be able to read .	0	0	1	0	0	0	0	1	0	1	0	1	0	0	0	0	1	0	0	0	0	0	0	1	0	0	0	0	0	0	1	0	0	0	0	0	1	1
518	518	Smartphone	Student 3	<200	Remote area	Science	Collaborative	Production	Video rec.	55	And shift the enlarged text on the monitor to read different parts of it by long-press and dragging it around.	0	0	1	1	0	1	0	1	0	1	0	1	0	0	0	0	1	0	0	0	0	0	0	0	0	0	0	0	0	0	1	0	0	0	0	0	1	1
519	519	Smartphone	Student 3	<200	Remote area	Science	Collaborative	Production	Video rec.	56	The student activate the Notes-document and the title field to write the name of the Notes-document .	0	0	1	1	0	0	1	0	0	0	0	1	0	0	1	0	1	0	0	0	0	1	1	0	1	1	0	0	0	0	0	0	0	0	0	0	0	0
520	520	Smartphone	Student 3	<200	Remote area	Science	Collaborative	Production	Video rec.	57	The student engages in writing , discusses , and reads during the group work.	0	0	1	0	0	0	0	1	0	1	0	1	0	0	0	0	0	0	0	0	0	1	0	0	0	0	0	0	0	0	0	0	0	0	0	0	1	0
521	521	Smartphone	Student 3	<200	Remote area	Science	Collaborative	Production	Video rec.	58	The student is writing a headline in bold font .	0	0	1	0	0	0	0	0	0	0	0	1	0	0	0	0	0	0	0	0	0	1	0	0	0	0	0	0	0	0	0	0	0	0	0	0	0	1
522	522	Smartphone	Student 3	<200	Remote area	Science	Collaborative	Production	Video rec.	59	The students keep on discussing the content of the text and their assignment and reading the text .	0	0	1	0	0	0	0	1	0	1	0	1	0	0	0	0	0	0	0	0	0	1	0	0	0	0	0	0	0	0	0	0	0	0	0	0	1	0
523	523	Smartphone	Student 3	<200	Remote area	Science	Collaborative	Production	Video rec.	60	The student continues to drag the text and zooms it to enlarge be able to read .	0	0	1	1	0	0	0	1	0	1	0	1	0	0	0	0	1	0	0	0	0	0	0	1	0	0	0	0	0	0	0	0	0	0	0	0	1	0
524	524	Smartphone	Student 3	<200	Remote area	Science	Collaborative	Production	Video rec.	61	The students discuss the text orally .	0	0	1	0	0	0	0	0	0	0	1	1	0	0	0	0	0	0	0	0	0	1	0	0	0	0	0	0	0	0	0	0	0	0	0	0	1	0
525	525	Smartphone	Student 3	<200	Remote area	Science	Collaborative	Production	Video rec.	62	The students direct their gaze at each other and the smartphone .	0	0	0	0	0	0	0	0	0	0	0	1	0	0	0	0	1	0	0	0	0	0	0	0	0	0	0	0	1	0	1	0	0	0	0	1	1	0
526	526	Smartphone	Student 3	<200	Remote area	Science	Collaborative	Production	Video rec.	63	The student taps recent apps button on the screen buttons and access through the Note-document window.	1	0	0	1	1	0	0	0	0	0	0	0	0	0	1	0	1	0	0	0	0	0	0	0	1	0	0	0	0	0	0	0	0	0	0	0	0	0
527	527	Smartphone	Student 3	<200	Remote area	Science	Collaborative	Production	Video rec.	64	The student starts writing in the notes-document on the letter buttons and figure buttons on the virtual keyboard	1	0	1	0	0	0	1	0	0	0	0	1	0	0	1	0	0	0	0	0	0	1	0	0	1	1	0	0	0	0	0	0	0	0	0	0	0	0
528	528	Smartphone	Student 3	<200	Remote area	Science	Collaborative	Production	Video rec.	65	The student position the cursor in the text .	0	0	1	0	0	0	0	0	0	0	0	1	0	1	1	0	1	0	0	0	0	0	0	0	1	0	0	0	0	0	1	0	0	0	0	0	0	0
529	529	Smartphone	Student 3	<200	Remote area	Science	Collaborative	Production	Video rec.	66	The enter button is used to enclose space between sections in the text .	1	0	1	0	0	0	0	0	0	0	0	1	0	0	1	0	1	0	0	0	0	1	0	1	1	0	0	0	0	0	0	0	0	0	0	0	0	1
530	530	Smartphone	Student 3	<200	Remote area	Science	Collaborative	Production	Video rec.	67	Word prediction is used to correct faulty words with the word suggestion .	0	0	0	0	0	0	0	0	0	0	0	0	0	1	1	0	1	0	0	0	0	1	0	1	1	0	0	0	0	0	0	0	0	0	0	0	0	1
531	531	Smartphone	Student 3	<200	Remote area	Science	Collaborative	Production	Video rec.	68	The word suggestions appear on top of the virtual keyboard and replaced when applied .	1	0	0	0	0	0	0	0	0	0	0	0	0	0	1	0	1	0	0	0	0	0	0	1	1	0	0	0	0	0	0	0	0	0	0	0	0	1
532	532	Smartphone	Student 3	<200	Remote area	Science	Collaborative	Production	Video rec.	69	Touches the text to position the cursor to correct the spelling while writing .	0	0	1	0	0	0	0	0	0	0	0	1	0	1	1	0	1	0	0	0	0	1	0	1	1	0	0	0	0	0	1	0	0	0	0	0	0	0
533	533	Smartphone	Student 3	<200	Remote area	Science	Collaborative	Production	Video rec.	70	The student uses backspac button to correct spelling .	1	0	0	0	0	0	0	0	0	0	0	1	0	0	1	0	1	0	0	0	0	1	0	1	1	0	0	0	0	0	0	0	0	0	0	0	0	0
534	534	Smartphone	Student 3	<200	Remote area	Science	Collaborative	Production	Video rec.	71	The students discuss the text orally .	0	0	1	0	0	0	0	0	0	0	1	1	0	0	0	0	0	0	0	0	0	1	0	0	0	0	0	0	0	0	0	0	0	0	0	0	1	0
535	535	Smartphone	Student 3	<200	Remote area	Science	Collaborative	Production	Video rec.	72	The students direct their gaze at each other and the smartphone .	0	0	0	0	0	0	0	0	0	0	0	1	0	0	0	0	1	0	0	0	0	0	0	0	0	0	0	0	1	0	1	0	0	0	0	1	1	0
536	536	Smartphone	Student 3	<200	Remote area	Science	Collaborative	Production	Video rec.	73	The student swipes down to access the contr. center .	0	0	0	1	1	0	0	0	0	0	0	0	0	0	1	0	1	0	0	0	0	0	0	0	1	0	0	0	0	0	1	0	0	0	0	0	0	0
537	537	Smartphone	Student 3	<200	Remote area	Science	Collaborative	Production	Video rec.	74	And terminates a Whatsapp message by swiping left while waiting to receive a picture of a text form the other student.	0	1	1	0	0	0	1	0	0	0	0	1	0	0	1	0	1	0	0	0	0	0	0	0	1	0	0	0	0	1	1	0	0	0	0	0	0	1
538	538	Smartphone	Student 3	<200	Remote area	Science	Collaborative	Production	Video rec.	75	Then swipes up again.	0	0	0	0	0	0	0	0	0	0	0	0	0	0	0	0	1	0	0	0	0	0	0	0	0	0	0	0	0	0	1	0	0	0	0	0	0	0
539	539	Smartphone	Student 3	<200	Remote area	Science	Collaborative	Consumption	Video rec.	76	The student reads out loud the text to the group .	0	0	1	0	0	0	0	1	0	1	0	1	0	0	0	0	0	0	0	0	0	0	0	0	0	0	0	0	0	0	0	0	0	0	0	0	1	0
540	540	Smartphone	Student 3	<200	Remote area	Science	Collaborative	Production	Video rec.	77	Touches the text to position the cursor to add content to the text .	0	0	1	0	0	0	0	0	0	0	0	1	0	1	1	0	1	0	0	0	0	1	0	0	1	0	0	0	0	0	1	0	0	0	0	0	0	0
541	541	Smartphone	Student 3	<200	Remote area	Science	Collaborative	Production	Video rec.	78	The enter button is used to enclose space between sections in the text .	1	0	1	0	0	0	0	0	0	0	0	1	0	0	1	0	1	0	0	0	0	1	0	1	1	0	0	0	0	0	0	0	0	0	0	0	0	1
542	542	Smartphone	Student 3	<200	Remote area	Science	Collaborative	Production	Video rec.	79	The enter button is used to enclose space between sections in the text .	1	0	1	0	0	0	0	0	0	0	0	1	0	0	1	0	1	0	0	0	0	1	0	1	1	0	0	0	0	0	0	0	0	0	0	0	0	1
543	543	Smartphone	Student 3	<200	Remote area	Science	Collaborative	Production	Video rec.	80	The student scrolls in text to be able to discover the content of the text .	0	0	1	0	0	0	0	0	0	0	0	1	0	0	0	0	1	0	0	0	0	0	0	0	0	0	0	0	0	0	1	0	0	0	0	0	0	0
544	544	Smartphone	Student 3	<200	Remote area	Science	Collaborative	Production	Video rec.	81	The student taps the bottom of the text to position the cursor .	0	0	1	1	0	0	0	0	0	0	0	1	0	1	1	0	1	0	0	0	0	0	0	0	1	0	0	0	0	0	1	0	0	0	0	0	0	0
545	545	Smartphone	Student 3	<200	Remote area	Science	Collaborative	Production	Video rec.	82	The student reads the picture commited to WhatsApp by the other student and writes in the Notes-document .	0	1	1	1	0	0	1	1	0	1	0	1	0	0	0	0	1	0	0	0	0	1	0	0	0	1	0	0	0	0	0	0	0	0	0	0	1	1
546	546	Smartphone	Student 3	<200	Remote area	Science	Collaborative	Production	Video rec.	83	The students discuss the text orally .	0	0	1	0	0	0	0	0	0	0	1	1	0	0	0	0	0	0	0	0	0	1	0	0	0	0	0	0	0	0	0	0	0	0	0	0	1	0
547	547	Smartphone	Student 3	<200	Remote area	Science	Collaborative	Production	Video rec.	84	The students direct their gaze at each other and the smartphone .	0	0	0	0	0	0	0	0	0	0	0	1	0	0	0	0	1	0	0	0	0	0	0	0	0	0	0	0	1	0	1	0	0	0	0	1	1	0
548	548	Smartphone	Student 3	<200	Remote area	Science	Collaborative	Production	Video rec.	85	The student positions the cursor in the text on its different sections .	0	0	1	0	0	0	0	0	0	0	0	1	0	1	1	0	1	0	0	0	0	0	0	0	1	0	0	0	0	0	1	0	0	0	0	0	0	0
549	549	Smartphone	Student 3	<200	Remote area	Science	Collaborative	Production	Video rec.	86	And the enter button is used to enclose space between sections in the text .	1	0	1	0	0	0	0	0	0	0	0	1	0	0	1	0	1	0	0	0	0	0	0	1	1	0	0	0	0	0	0	0	0	0	0	0	0	0
550	550	Smartphone	Student 3	<200	Remote area	Science	Collaborative	Production	Video rec.	87	The student positions the cursor in the text on its different sections .	0	0	1	0	0	0	0	0	0	0	0	1	0	1	1	0	1	0	0	0	0	0	0	0	1	0	0	0	0	0	1	0	0	0	0	0	0	0
551	551	Smartphone	Student 3	<200	Remote area	Science	Collaborative	Production	Video rec.	88	And the back button is used to correct text with the letter buttons on the virtual keyboard .	1	0	1	0	0	0	0	0	0	0	0	1	0	0	1	0	1	0	0	0	0	0	0	1	1	0	0	0	0	0	0	0	0	0	0	0	0	0
552	552	Smartphone	Student 3	<200	Remote area	Science	Collaborative	Production	Video rec.	89	The student positions the cursor in the text on its different sections .	0	0	1	0	0	0	0	0	0	0	0	1	0	1	1	0	1	0	0	0	0	0	0	0	1	0	0	0	0	0	1	0	0	0	0	0	0	0
553	553	Smartphone	Student 3	<200	Remote area	Science	Collaborative	Production	Video rec.	90	And the back button is used to correct text with the letter buttons on the virtual keyboard .	1	0	1	0	0	0	0	0	0	0	0	1	0	0	1	0	1	0	0	0	0	0	0	1	1	0	0	0	0	0	0	0	0	0	0	0	0	0
554	554	Smartphone	Student 3	<200	Remote area	Science	Collaborative	Production	Video rec.	91	The student positions the cursor in the text on its different sections .	0	0	1	0	0	0	0	0	0	0	0	1	0	1	1	0	1	0	0	0	0	0	0	0	1	0	0	0	0	0	1	0	0	0	0	0	0	1
555	555	Smartphone	Student 3	<200	Remote area	Science	Collaborative	Production	Video rec.	92	And the enter button is used to enclose space between sections in the text .	1	0	1	0	0	0	0	0	0	0	0	1	0	0	1	0	1	0	0	0	0	0	0	1	1	0	0	0	0	0	0	0	0	0	0	0	0	1
556	556	Smartphone	Student 3	<200	Remote area	Science	Collaborative	Production	Video rec.	93	The student scrolls with finger in text to the beginning of the text .	0	0	1	0	0	0	0	0	0	0	0	1	0	0	0	0	1	0	0	0	0	0	0	0	0	0	0	0	0	0	1	0	0	0	0	0	0	0
557	557	Smartphone	Student 3	<200	Remote area	Science	Collaborative	Consumption	Video rec.	94	The student reads from the smartphone monitor .	0	0	0	0	0	1	0	1	0	1	0	0	0	0	0	0	0	0	0	0	0	0	0	0	0	0	0	0	0	0	0	0	0	0	0	1	1	0
558	558	Smartphone	Student 3	<200	Remote area	Science	Collaborative	Production	Video rec.	95	The students discuss the text orally .	0	0	1	0	0	0	0	0	0	0	1	1	0	0	0	0	0	0	0	0	0	1	0	0	0	0	0	0	0	0	0	0	0	0	0	0	1	0
559	559	Smartphone	Student 3	<200	Remote area	Science	Collaborative	Production	Video rec.	96	The students direct their gaze at each other and the smartphone .	0	0	0	0	0	0	0	0	0	0	0	1	0	0	0	0	1	0	0	0	0	0	0	0	0	0	0	0	1	0	1	0	0	0	0	1	1	0
560	560	Smartphone	Student 3	<200	Remote area	Science	Collaborative	Production	Video rec.	97	The student swipes down to access the contr. center in order to view the battery level.	0	0	0	1	1	0	0	1	0	0	0	0	0	0	1	0	1	0	0	0	0	0	0	0	1	0	0	0	0	0	1	0	0	0	0	0	0	0
561	561	Smartphone	Student 3	<200	Remote area	Science	Collaborative	Production	Video rec.	98	The student then taps the home button on the screen buttons to access the home screen .	1	0	0	1	0	0	0	0	0	0	0	0	0	0	1	0	1	0	0	0	0	0	0	0	1	0	0	0	0	0	0	0	0	0	0	0	0	0
562	562	Smartphone	Student 3	<200	Remote area	Science	Collaborative	Production	Video rec.	99	And there taps the Whatsapp window to access the text .	0	1	1	1	1	0	1	0	0	0	0	1	0	0	1	0	1	0	0	0	0	0	0	0	1	0	0	0	0	0	0	0	0	0	0	0	0	0
563	563	Smartphone	Student 3	<200	Remote area	Science	Collaborative	Production	Video rec.	100	The student then taps the back arrow button to exit the note page .	1	0	0	1	1	0	1	0	0	0	0	0	0	0	1	0	1	0	0	0	0	0	0	0	1	1	0	0	0	1	0	0	0	0	0	0	0	0
564	564	Smartphone	Student 3	<200	Remote area	Science	Collaborative	Production	Video rec.	101	And access the message record in Whatsapp .	0	1	0	1	0	0	1	0	0	0	0	0	0	0	1	0	1	0	0	1	0	0	0	0	1	0	0	0	0	0	0	0	0	0	0	0	0	0
565	565	Smartphone	Student 3	<200	Remote area	Science	Collaborative	Production	Video rec.	102	The student scrolls to the bottom of the message record in WhatsApp and taps on a message to access .	0	1	0	1	0	0	1	0	0	0	0	0	0	0	1	0	1	0	0	1	0	0	0	0	1	0	0	0	0	1	1	0	0	0	0	0	0	0
566	566	Smartphone	Student 3	<200	Remote area	Science	Collaborative	Production	Video rec.	103	The student then taps the phone button to make the call to the other student in order to proj-ct the PowerPoint.	1	0	0	1	0	0	1	0	0	0	0	0	0	0	1	0	1	1	0	0	0	0	0	0	1	0	0	0	0	0	0	0	0	0	0	0	0	0
567	567	Smartphone	Student 3	<200	Remote area	Science	Collaborative	Production	Video rec.	104	The student navigates the smartphone by tapping the recent apps button and by accessing the Notes app window .	1	0	0	1	1	0	0	0	0	0	0	0	0	0	1	0	1	0	0	0	0	0	0	0	1	0	0	0	0	0	0	0	0	0	0	1	0	0
568	568	Smartphone	Student 3	<200	Remote area	Science	Collaborative	Consumption	Video rec.	105	The student reads from the text .	0	0	1	0	0	0	0	1	0	1	0	1	0	0	0	0	0	0	0	0	0	0	0	0	0	0	0	0	0	0	0	0	0	0	0	0	1	0
569	569	Smartphone	Student 3	<200	Remote area	Science	Collaborative	Production	Video rec.	106	The students discuss the text orally .	0	0	1	0	0	0	0	0	0	0	1	1	0	0	0	0	0	0	0	0	0	1	0	0	0	0	0	0	0	0	0	0	0	0	0	0	1	0
570	570	Smartphone	Student 3	<200	Remote area	Science	Collaborative	Production	Video rec.	107	The students direct their gaze at each other and the smartphone .	0	0	0	0	0	0	0	0	0	0	0	1	0	0	0	0	1	0	0	0	0	0	0	0	0	0	0	0	1	0	1	0	0	0	0	1	1	0
571	571	Smartphone	Student 3	<200	Remote area	Science	Collaborative	Production	Video rec.	108	The student taps the recent app button on the screen button to exit the Whatsapp call and access the text .	1	1	1	1	1	0	1	0	0	0	0	1	0	0	1	0	1	0	0	0	0	0	0	0	1	0	0	0	0	0	0	0	0	0	0	0	0	0
572	572	Smartphone	Student 3	<200	Remote area	Science	Collaborative	Production	Video rec.	109	The student taps the back button on the screen buttons to minimize the Whatsapp window .	1	1	0	1	1	0	1	0	0	0	0	0	0	0	1	0	1	0	0	0	0	0	0	0	1	0	0	0	0	0	1	0	0	0	0	0	0	0
573	573	Smartphone	Student 3	<200	Remote area	Science	Collaborative	Production	Video rec.	110	The student wants to get superimposed on the Notes window .	0	0	0	0	1	0	1	0	0	0	0	0	0	0	1	0	0	0	0	0	0	0	0	0	1	1	0	0	0	0	0	0	0	0	0	0	0	1
574	574	Smartphone	Student 3	<200	Remote area	Science	Collaborative	Production	Video rec.	111	Student scrolls with the finger on the text .	0	0	1	0	0	0	0	0	0	0	0	1	0	0	0	0	1	0	0	0	0	0	0	0	0	0	0	0	0	0	1	0	0	0	0	0	0	0
575	575	Smartphone	Student 3	<200	Remote area	Science	Collaborative	Production	Video rec.	112	The student takes up the smartphone and holds it in front of the laptop .	0	0	0	0	0	0	0	0	0	0	0	0	0	0	0	1	0	0	0	0	0	0	0	0	0	0	0	0	0	0	0	0	0	0	0	1	0	0
576	576	Smartphone	Student 3	<200	Remote area	Science	Collaborative	Production	Video rec.	113	The student taps the WhatsApp window to make it appear in the whole monitor .	0	1	0	1	1	1	1	0	0	0	0	0	0	0	1	0	1	0	0	0	0	0	0	0	1	0	0	0	0	0	0	0	0	0	0	0	0	0
577	577	Smartphone	Student 3	<200	Remote area	Science	Collaborative	Production	Video rec.	114	The other student reads the text to put it on the PowerPoint slide.	0	0	1	0	0	0	1	1	0	1	0	1	0	0	0	0	0	1	0	0	0	0	0	0	0	0	0	0	0	0	0	0	0	0	0	0	1	0
578	578	Smartphone	Student 3	<200	Remote area	Science	Collaborative	Production	Video rec.	115	The student taps the switch the focus of the camera lens button , to play-in the Powerpoint to the student on WhatsApp .	1	0	0	1	0	0	1	0	0	0	0	0	0	0	1	0	1	1	0	0	0	0	0	0	1	0	0	0	0	0	1	0	0	0	0	0	0	0
579	579	Smartphone	Student 3	<200	Remote area	Science	Collaborative	Production	Video rec.	116	And then taps and switch the camera lens button again back.	1	0	0	1	0	0	0	0	0	0	0	0	0	0	1	9	1	0	0	0	0	0	0	0	1	0	0	0	0	0	1	0	0	0	0	0	0	0
580	580	Smartphone	Student 3	<200	Remote area	Science	Collaborative	Production	Video rec.	117	Recent app button is used on screen buttons to access the text .	1	0	1	1	1	0	0	0	0	0	0	1	0	0	1	0	1	0	0	0	0	0	0	0	1	0	0	0	0	0	0	0	0	0	0	0	0	0
581	581	Smartphone	Student 3	<200	Remote area	Science	Collaborative	Production	Video rec.	118	The student swipes down to access the contr. center and to tap the WhatsApp page to access the call and the video window .	0	1	0	1	1	0	1	0	0	0	0	0	0	0	1	0	1	0	0	0	0	0	0	0	1	0	0	0	0	0	1	0	0	0	0	0	0	0
582	582	Smartphone	Student 3	<200	Remote area	Science	Collaborative	Production	Video rec.	119	The student reads from the smartphone the filmed text .	0	0	1	0	0	0	1	1	0	1	0	1	0	0	0	0	0	1	0	0	0	0	0	0	0	0	0	0	0	0	0	0	0	0	0	1	1	0
583	583	Smartphone	Student 3	<200	Remote area	Science	Collaborative	Production	Video rec.	120	The student ends the call with by tapping the phone button symbol .	1	0	0	1	0	0	0	0	0	0	0	0	0	0	1	0	1	0	0	0	0	0	0	0	1	0	0	0	0	0	0	0	0	0	0	0	0	0
584	584	Smartphone	Student 3	<200	Remote area	Mixed subjects	Collaborative	Consumption	Interview	1	We had science lesson and we started on meteorology and we would document weather .	0	0	0	0	0	0	0	0	0	0	0	0	0	0	0	0	0	0	0	0	0	0	0	0	0	0	1	1	0	0	0	0	0	0	0	0	1	0
585	585	Smartphone	Student 3	<200	Remote area	Mixed subjects	Collaborative	Production	Interview	2	And then we would do a PowerPoint about that whole story .	0	0	0	0	0	0	1	0	0	1	0	0	0	0	0	0	0	1	0	0	0	1	0	0	0	0	0	0	0	0	0	0	0	0	0	0	1	0
586	586	Smartphone	Student 3	<200	Remote area	Mixed subjects	Collaborative	Production	Interview	3	We used our smartphones .	0	0	0	0	0	0	0	0	0	0	0	0	0	0	0	0	0	0	0	0	0	0	0	0	0	0	0	0	0	0	0	0	0	0	0	1	0	0
587	587	Smartphone	Student 3	<200	Remote area	Mixed subjects	Collaborative	Production	Interview	4	With the smartphones we searched for facts. We wrote the facts into the Notes-document .	0	0	0	1	0	0	1	0	0	0	0	0	0	0	0	0	1	0	0	0	0	0	0	0	0	1	0	0	0	0	0	0	0	0	0	1	0	0
588	588	Smartphone	Student 3	<200	Remote area	Mixed subjects	Collaborative	Production	Interview	5	Then we went into a PowerPoint on a laptop and made a PowerPoint of it all.	0	0	0	0	0	0	1	0	0	0	0	0	0	0	0	1	0	1	0	0	0	0	0	0	0	0	0	0	0	0	0	0	0	0	0	0	0	0
589	589	Smartphone	Student 3	<200	Remote area	Mixed subjects	Collaborative	Consumption	Interview	6	Yes, we received an information that we could get information from. We got it through Whatsapp from our teacher.	0	1	0	0	0	0	1	0	0	0	0	0	0	0	0	0	1	0	0	0	0	0	0	0	0	0	0	0	0	0	1	0	0	0	0	0	1	0
590	590	Smartphone	Student 3	<200	Remote area	Mixed subjects	Collaborative	Production	Interview	7	Yes, if we take physical education as an example. Then we usually use our smartphones to evaluate the lesson.	0	0	0	0	0	0	0	0	0	1	0	0	0	0	0	0	0	0	0	0	0	1	0	0	0	0	1	0	0	0	0	0	0	0	1	1	1	0
591	591	Smartphone	Student 3	<200	Remote area	Mixed subjects	Collaborative	Production	Interview	8	At science we usually search for facts. So, it tends to vary quite a bit.	0	0	0	1	0	0	0	0	0	0	0	0	0	0	0	0	1	0	0	0	0	0	0	0	0	0	1	1	0	0	0	0	0	0	0	0	1	0
592	592	Smartphone	Student 3	<200	Remote area	Mixed subjects	Collaborative	Production	Interview	9	The result was quite good. We could have had more text [in PowerPoint] and a little more mixed information .	0	0	1	0	0	0	1	0	0	0	0	1	0	0	0	0	0	1	0	0	0	0	0	0	0	0	0	0	0	0	0	0	0	0	0	0	1	0
593	593	Smartphone	Student 3	<200	Remote area	Mixed subjects	Collaborative	Consumption	Interview	10	It felt like it was the same information [in the text that we write] .	0	0	1	0	0	0	0	0	0	0	0	1	0	0	0	0	0	0	0	0	0	1	0	0	0	0	0	0	0	0	0	0	0	0	0	0	1	0
594	594	Smartphone	Student 3	<200	Remote area	Mixed subjects	Collaborative	Consumption	Interview	11	Yes, we could have explored a little more on our smartphones and obtained a little more mixed information .	0	0	0	0	0	0	0	0	0	0	0	0	1	0	0	0	0	0	0	0	0	0	0	0	0	0	0	0	0	0	0	0	0	0	0	1	1	0
595	595	Smartphone	Student 3	<200	Remote area	Mixed subjects	Collaborative	Consumption	Interview	12	We went to Google and searched for it.	0	0	0	1	0	0	1	0	0	0	0	0	0	0	0	0	1	0	0	0	0	0	0	0	0	0	0	0	0	0	0	0	0	0	0	0	0	0
596	596	Smartphone	Student 3	<200	Remote area	Mixed subjects	Collaborative	Consumption	Interview	13	This is a good question that I do not have an answer to.	0	0	0	0	0	0	0	0	0	0	1	1	0	0	0	0	0	0	0	0	0	1	0	0	0	0	0	0	0	0	0	0	0	0	0	0	1	0
597	597	Smartphone	Student 3	<200	Remote area	Mixed subjects	Collaborative	Production	Interview	14	We could have searched for facts on both the laptop and the smartphone .	0	0	0	1	0	0	0	0	0	0	0	0	0	0	0	1	1	0	0	0	0	0	0	0	0	0	0	0	0	0	0	0	0	0	0	1	0	0
598	598	Smartphone	Student 3	<200	Remote area	Mixed subjects	Collaborative	Production	Interview	15	And then I write the text on the smartphone and then write it on the laptop .	0	0	1	0	0	0	0	0	0	0	0	1	0	0	0	1	0	0	0	0	0	1	0	0	0	0	0	0	0	0	0	0	0	0	0	1	0	0
599	599	Smartphone	Student 3	<200	Remote area	Mixed subjects	Collaborative	Production	Interview	16	If you write it [the text] down in Notes-document on the smartphone , the text you have on the smartphone .	0	0	1	0	0	0	1	0	0	0	0	1	0	0	0	0	0	0	0	0	0	1	0	0	0	1	0	0	0	0	0	0	0	0	0	1	0	0
600	600	Smartphone	Student 3	<200	Remote area	Mixed subjects	Collaborative	Production	Interview	17	Then it is much faster to write it down on the laptop .	0	0	1	0	0	0	0	0	0	0	0	1	0	0	0	1	0	0	0	0	0	1	0	0	0	0	0	0	0	0	0	0	0	0	0	0	0	0
601	601	Smartphone	Student 3	<200	Remote area	Mixed subjects	Individual	Consumption	Interview	18	I would think that grade three, i.e., the last semester of the third grade, they could try to have the smartphones so they know how it feels.	0	0	0	0	0	0	0	0	0	0	0	0	0	0	0	0	0	0	0	0	0	0	0	0	0	0	0	0	0	0	0	0	0	0	0	1	0	0
602	602	Smartphone	Student 3	<200	Remote area	Mixed subjects	Individual	Consumption	Interview	19	So, a little more smartphones and a little more laptops and a little less tablets .	0	0	0	0	0	0	0	0	1	0	0	0	0	0	0	1	0	0	0	0	0	0	0	0	0	0	0	0	0	0	0	0	0	0	0	1	0	0
603	603	Smartphone	Student 3	<200	Remote area	Mixed subjects	Individual	Consumption	Interview	20	We usually mostly use it in mathematics and when we are going to sign up for the help record.	0	0	0	0	0	0	0	0	0	0	0	0	0	0	0	0	1	0	0	0	0	0	0	0	0	0	1	0	0	0	1	0	1	0	0	0	1	0
604	604	Smartphone	Student 3	<200	Remote area	Mixed subjects	Individual	Consumption	Interview	21	Then you sign up your name then the teacher comes and helps us in that order.	0	0	0	0	0	0	0	0	0	0	0	0	0	0	0	0	1	0	0	0	0	0	0	0	0	0	0	0	0	0	1	0	0	0	0	0	0	0
605	605	Smartphone	Student 3	<200	Remote area	Mixed subjects	Individual	Consumption	Interview	22	We have a group called the help group on Whatsapp so you go in there and sign up your name.	0	1	0	0	0	0	1	0	0	0	0	0	0	0	0	0	1	0	0	0	0	0	0	0	0	0	0	0	0	0	1	0	0	0	0	0	1	0
606	606	Smartphone	Student 3	<200	Remote area	Mixed subjects	Individual	Consumption	Interview	23	If we have exercise , and have questions , we can submit them in our Whatsapp or privately to the teacher.	0	1	0	0	0	0	1	0	0	0	0	0	0	0	0	0	1	0	0	0	0	1	0	0	0	0	0	0	0	0	1	0	0	0	0	0	1	0
607	607	Smartphone	Student 3	<200	Remote area	Mixed subjects	Individual	Consumption	Interview	24	Whatsapp , Notes-document and Google are the three we most often use.	0	1	0	0	0	0	1	0	0	0	0	0	0	0	0	0	0	0	0	0	0	0	0	0	0	1	0	0	0	0	0	0	0	0	0	0	0	0
608	608	Smartphone	Student 3	<200	Remote area	Mixed subjects	Individual	Production	Interview	25	Notes , we write down information and so on.	0	0	1	0	0	0	0	0	0	0	0	1	0	0	0	0	0	0	0	0	0	1	0	0	0	0	0	0	0	0	0	0	0	0	0	0	1	0
609	609	Smartphone	Student 3	<200	Remote area	Mixed subjects	Individual	Production	Interview	26	If we are going to commit a picture that the teacher is to print, then we usually commit it via Gmail .	0	0	0	1	0	0	1	0	0	0	0	0	0	0	0	0	1	0	0	0	0	0	0	0	0	1	0	0	0	0	0	0	0	0	0	0	0	1
610	610	Smartphone	Student 3	<200	Remote area	Mixed subjects	Individual	Consumption	Interview	27	Yes, XX themselves had a laptop where they could search for information .	0	0	0	1	0	0	0	0	0	0	0	0	0	0	0	1	1	0	0	0	0	0	0	0	0	0	0	0	0	0	0	0	0	0	0	0	1	0
611	611	Smartphone	Student 3	<200	Remote area	Mixed subjects	Individual	Consumption	Interview	28	They have tablets .	0	0	0	0	0	0	0	0	1	0	0	0	0	0	0	0	0	0	0	0	0	0	0	0	0	0	0	0	0	0	0	0	0	0	0	0	0	0
612	612	Smartphone	Student 3	<200	Remote area	Mixed subjects	Individual	Consumption	Interview	29	And the same for XX.	0	0	0	0	0	0	0	0	0	0	0	0	0	0	0	0	0	0	0	0	0	0	0	0	0	0	0	0	0	0	0	0	0	0	0	0	0	0
613	613	Smartphone	Student 3	<200	Remote area	Mixed subjects	Individual	Consumption	Interview	30	Because we usually mix our classes a lot.	0	0	0	0	0	0	0	0	0	0	0	0	0	0	0	0	0	0	0	0	0	0	0	0	0	0	0	0	0	0	0	0	0	0	0	0	0	0
614	614	Smartphone	Student 3	<200	Remote area	Mixed subjects	Individual	Consumption	Interview	31	In case XX should have information for the whole school.	0	0	0	0	0	0	0	0	0	0	0	0	0	0	0	0	0	0	0	0	0	0	0	0	0	0	0	0	0	0	0	0	0	0	0	0	1	0
615	615	Smartphone	Student 3	<200	Remote area	Mixed subjects	Individual	Consumption	Interview	32	You could write it in there.	0	0	1	0	0	0	0	0	0	0	0	1	0	0	0	0	0	0	0	0	0	1	0	0	0	0	0	0	0	0	0	0	0	0	0	0	0	0
616	616	Smartphone	Student 3	<200	Remote area	Mixed subjects	Individual	Consumption	Interview	33	And you could have a common program so everyone could have access to it.	0	0	0	1	0	0	0	0	0	0	0	0	0	0	0	0	1	0	0	0	0	0	0	0	0	0	0	0	0	0	0	0	0	0	0	0	0	0
617	617	Smartphone	Student 3	<200	Remote area	Mixed subjects	Individual	Consumption	Interview	34	I usually use most functions when I tap on Whatsapp .	0	1	0	1	0	0	1	0	0	0	0	0	0	0	0	0	1	0	0	0	0	0	0	0	0	0	0	0	0	0	0	0	0	0	0	0	0	0
618	618	Smartphone	Student 3	<200	Remote area	Mixed subjects	Individual	Production	Interview	35	And write something to, for example, the teacher.	0	0	1	0	0	0	0	0	0	0	0	1	0	0	0	0	0	0	0	0	0	1	0	0	0	0	0	0	0	0	0	0	0	0	0	0	0	0
619	619	Smartphone	Student 3	<200	Remote area	Mixed subjects	Individual	Production	Interview	36	I tap on the XX- unit and tap the virtual keyboard and all the letter buttons .	1	0	0	1	0	0	0	0	0	0	0	0	0	0	1	0	1	0	0	0	0	0	0	0	1	0	0	0	0	0	0	0	0	0	0	0	0	0
620	620	Smartphone	Student 3	<200	Remote area	Mixed subjects	Individual	Production	Interview	37	And then I tap commit . That's kind of where I tend to be most.	0	0	0	1	0	0	0	0	0	0	0	0	0	0	0	0	1	0	0	0	0	0	0	0	0	0	0	0	0	0	0	0	0	0	0	0	0	0
621	621	Smartphone	Student 3	<200	Remote area	Mixed subjects	Individual	Consumption	Interview	38	If I am going to access an app, e.g. Notes-document and if I should remember what to write .	0	0	1	1	0	0	1	0	0	0	0	1	0	0	0	0	1	0	0	0	0	1	0	0	0	1	0	0	0	0	0	0	0	0	0	0	0	0
622	622	Smartphone	Student 3	<200	Remote area	Mixed subjects	Collaborative	Production	Interview	39	Then I tap the recent apps which means that there are several files.	0	0	0	1	1	0	0	0	0	0	0	0	0	0	1	0	1	0	0	0	0	0	0	0	1	0	0	0	0	0	0	0	0	0	0	0	0	0
623	623	Smartphone	Student 3	<200	Remote area	Mixed subjects	Collaborative	Production	Interview	40	Then I access to the XX- unit and check what I am going to write .	0	0	1	1	0	0	0	0	0	0	0	1	0	0	0	0	1	0	0	0	0	1	0	0	0	0	0	0	0	0	0	0	0	0	0	0	0	0
624	624	Smartphone	Student 3	<200	Remote area	Mixed subjects	Collaborative	Production	Interview	41	And then I just tap there again and swipe to Notes and write .	0	0	1	1	0	0	1	0	0	0	0	1	0	0	0	0	1	0	0	0	0	1	0	0	0	0	0	0	0	0	1	0	0	0	0	0	0	0
625	625	Smartphone	Student 3	<200	Remote area	Mixed subjects	Collaborative	Production	Interview	42	So, if I have to make a new window, or description or whatever it is, a new Note simply.	0	0	1	0	1	0	0	0	0	0	0	1	0	0	1	0	0	0	0	1	0	1	0	0	1	0	0	0	0	0	0	0	0	0	0	0	0	0
626	626	Smartphone	Student 3	<200	Remote area	Mixed subjects	Collaborative	Production	Interview	43	Then there is a plus symbol in the bottom corner.	0	0	0	0	0	0	0	0	0	0	0	0	0	0	1	0	0	0	0	0	0	0	0	0	1	0	0	0	0	0	0	0	0	0	0	0	0	0
627	627	Smartphone	Student 3	<200	Remote area	Mixed subjects	Collaborative	Production	Interview	44	And then you tap it and that's the title or something [field].	0	0	0	1	0	0	0	0	0	0	0	0	0	0	1	0	1	0	0	0	0	0	1	0	1	0	0	0	0	0	0	0	0	0	0	0	0	0
628	628	Smartphone	Student 3	<200	Remote area	Mixed subjects	Collaborative	Production	Interview	45	And then you write what it should be at the very top, which is like bold style.	0	0	1	0	0	0	0	0	0	0	0	1	0	0	0	0	0	0	0	0	0	1	0	0	0	0	0	0	0	0	0	0	0	0	0	0	0	1
629	629	Smartphone	Student 3	<200	Remote area	Mixed subjects	Collaborative	Production	Interview	46	And, then I tap down there to write what I am going to write .	0	0	1	1	0	0	0	0	0	0	0	1	0	0	0	0	1	0	0	0	0	1	0	0	0	0	0	0	0	0	0	0	0	0	0	0	0	0
630	630	Smartphone	Student 3	<200	Remote area	Mixed subjects	Collaborative	Consumption	Interview	47	I used my thumb and forefinger to enlarge in to read a little better what was written on the monitor .	0	0	1	0	0	1	0	1	0	1	0	1	0	0	0	0	0	0	0	0	0	1	0	0	0	0	0	0	0	0	0	0	0	0	0	0	1	0
631	631	Smartphone	Student 3	<200	Remote area	Mixed subjects	Collaborative	Consumption	Interview	48	Yes, to be able to read the text in different places.	0	0	1	0	0	0	0	1	0	1	0	1	0	0	0	0	0	0	0	0	0	0	0	0	0	0	0	0	0	0	0	0	0	0	0	0	1	0
632	632	Smartphone	Student 3	<200	Remote area	Mixed subjects	Collaborative	Consumption	Interview	49	But to distinguish more information from the paper then and read more what was written .	0	0	1	0	0	0	0	1	0	1	0	1	0	0	0	0	1	0	0	0	0	1	0	1	0	0	0	0	0	0	0	0	0	0	0	0	1	0
633	633	Smartphone	Student 3	<200	Remote area	Mixed subjects	Collaborative	Production	Interview	50	Yes, the function I use the most is to swipe .	0	0	0	0	0	0	0	0	0	0	0	0	0	0	0	0	1	0	0	0	0	0	0	0	0	0	0	0	0	0	1	0	0	0	0	0	0	0
634	634	Smartphone	Student 3	<200	Remote area	Mixed subjects	Collaborative	Consumption	Interview	51	If you have a smartphone and are going up, or there are two different windows .	0	0	0	0	1	0	0	0	0	0	0	0	0	0	1	0	0	0	0	0	0	0	0	0	1	0	0	0	0	0	0	0	0	0	0	1	0	0
635	635	Smartphone	Student 3	<200	Remote area	Mixed subjects	Collaborative	Consumption	Interview	52	If you swipe up you will come to a window .	0	0	0	0	1	0	0	0	0	0	0	0	0	0	1	0	1	0	0	0	0	0	0	0	1	0	0	0	0	0	1	0	0	0	0	0	0	0
636	636	Smartphone	Student 3	<200	Remote area	Mixed subjects	Collaborative	Consumption	Interview	53	And then if you swipe down you get to another.	0	0	0	0	0	0	0	0	0	0	0	0	0	0	0	0	1	0	0	0	0	0	0	0	0	0	0	0	0	0	1	0	0	0	0	0	0	0
637	637	Smartphone	Student 3	<200	Remote area	Mixed subjects	Collaborative	Consumption	Interview	54	And if you swipe to the side, you will come to a new window .	0	0	0	0	1	0	0	0	0	0	0	0	0	0	1	0	1	0	0	0	0	0	0	0	1	0	0	0	0	0	1	0	0	0	0	0	0	0
638	638	Smartphone	Student 3	<200	Remote area	Mixed subjects	Collaborative	Consumption	Interview	55	And that may be where the app you are looking for is.	0	0	0	0	0	0	0	0	0	0	0	0	0	0	0	0	0	0	0	0	0	0	0	0	0	0	0	0	0	0	0	0	0	0	0	0	0	0
639	639	Smartphone	Student 3	<200	Remote area	Mixed subjects	Collaborative	Production	Interview	56	Pressing Enter button brings you down a notch so that you take the text in sections .	1	0	1	1	0	0	0	0	0	0	0	1	0	0	1	0	1	0	0	0	0	0	0	0	1	0	0	0	0	0	0	0	0	0	0	0	0	1
640	640	Smartphone	Student 3	<200	Remote area	Mixed subjects	Collaborative	Production	Interview	57	So that it does not become so huge .	0	0	0	0	0	0	0	0	0	0	0	0	0	0	0	0	0	0	0	0	0	0	0	0	0	0	0	0	0	0	0	0	0	0	0	0	0	1
641	641	Smartphone	Student 3	<200	Remote area	Mixed subjects	Collaborative	Production	Interview	58	Then it usually makes it easier to do it as in different bullets instead.	0	0	0	0	0	0	0	0	0	0	0	0	0	0	0	0	0	0	0	0	0	0	0	0	0	0	0	0	0	0	0	0	0	0	0	0	0	1
642	642	Smartphone	Student 3	<200	Remote area	Mixed subjects	Collaborative	Production	Interview	59	To be able to enlarge something that is in small text .	0	0	1	0	0	0	0	0	0	0	0	1	0	0	0	0	0	0	0	0	0	0	0	0	0	0	0	0	0	0	0	0	0	0	0	0	0	1
643	643	Smartphone	Student 3	<200	Remote area	Mixed subjects	Collaborative	Consumption	Interview	60	I read the text to be able to write another part of it for the PowerPoint presentation.	0	0	1	0	0	0	1	1	0	1	0	1	0	0	0	0	0	1	0	0	0	1	0	0	0	0	0	0	0	0	0	0	0	0	0	0	1	0
644	644	Smartphone	Student 3	<200	Remote area	Mixed subjects	Collaborative	Production	Interview	61	And then there was group work and then you have to discuss in your group to get a good text together.	0	0	1	0	0	0	0	0	0	0	0	1	0	0	0	0	0	0	0	0	0	1	0	0	0	0	0	0	0	0	0	0	0	0	0	0	1	0
645	645	Smartphone	Student 3	<200	Remote area	Mixed subjects	Collaborative	Consumption	Interview	62	Yes, I read on my smartphone .	0	0	0	0	0	0	0	1	0	1	0	0	0	0	0	0	0	0	0	0	0	0	0	0	0	0	0	0	0	0	0	0	0	0	0	1	1	0
646	646	Smartphone	Student 3	<200	Remote area	Mixed subjects	Collaborative	Consumption	Interview	63	So then I used the smartphone to retrieve the information .	0	0	0	1	0	0	0	0	0	0	0	0	0	0	0	0	1	0	0	0	0	0	0	0	0	0	0	0	0	0	0	0	0	0	0	1	1	0
647	647	Smartphone	Student 3	<200	Remote area	Mixed subjects	Collaborative	Production	Interview	64	Then I write it down in a program on the smartphone .	0	0	1	0	0	0	0	0	0	0	0	1	0	0	0	0	0	0	0	0	0	1	0	0	0	0	0	0	0	0	0	0	0	0	0	1	0	0
648	648	Smartphone	Student 3	<200	Remote area	Mixed subjects	Collaborative	Production	Interview	65	To then write it on a laptop .	0	0	1	0	0	0	0	0	0	0	0	1	0	0	0	1	0	0	0	0	0	1	0	0	0	0	0	0	0	0	0	0	0	0	0	0	0	0
649	649	Smartphone	Student 3	<200	Remote area	Science	Collaborative	Consumption	Observation	1	Science Lesson 9:30-11: 00: What is meteorology	0	0	0	0	0	0	0	0	0	0	0	0	0	0	0	0	0	0	0	0	0	0	0	0	0	0	1	1	0	0	0	0	0	0	0	0	1	0
650	650	Smartphone	Student 3	<200	Remote area	Science	Collaborative	Consumption	Observation	2	Smartphone , Padlet.com , Vimeo ; WHatsapp , and in the mail Gmail .	0	1	0	0	0	0	1	0	0	0	0	0	0	0	0	0	0	1	0	0	0	0	0	0	0	1	0	0	0	0	0	0	0	0	0	1	0	0
651	651	Smartphone	Student 3	<200	Remote area	Science	Collaborative	Consumption	Observation	3	Notes-document that can be used for the powerpoint.	0	0	0	0	0	0	1	0	0	0	0	0	0	0	0	0	0	1	0	0	0	0	0	0	0	1	0	0	0	0	0	0	0	0	0	0	0	0
652	652	Smartphone	Student 3	<200	Remote area	Science	Collaborative	Consumption	Observation	4	Smartboard, Laptop .	0	0	0	0	0	0	0	0	0	0	0	0	0	0	0	1	0	0	0	0	0	0	0	0	0	0	0	0	0	0	0	0	0	0	0	0	0	0
653	653	Smartphone	Student 3	<200	Remote area	Science	Collaborative	Production	Observation	5	Swipe left/right.	0	0	0	0	0	0	0	0	0	0	0	0	0	0	0	0	1	0	0	0	0	0	0	0	0	0	0	0	0	0	1	0	0	0	0	0	0	0
654	654	Smartphone	Student 3	<200	Remote area	Science	Collaborative	Production	Observation	6	Write document with Virtual keyboard .	1	0	1	0	0	0	0	0	0	0	0	1	0	0	1	0	0	0	0	0	0	1	0	0	1	0	0	0	0	0	0	0	0	0	0	0	0	0
655	655	Smartphone	Student 3	<200	Remote area	Science	Collaborative	Consumption	Observation	7	Auto-generated heading field	0	0	0	0	0	0	0	0	0	0	0	0	0	0	1	0	0	0	0	0	0	0	1	0	1	0	0	0	0	0	0	0	0	0	0	0	0	0
656	656	Smartphone	Student 3	<200	Remote area	Science	Collaborative	Consumption	Observation	8	The headline are enlarged above.	0	0	0	0	0	0	0	0	0	0	0	0	0	0	0	0	0	0	0	0	0	0	0	0	0	0	0	0	0	0	0	0	0	0	0	0	0	1
657	657	Smartphone	Student 3	<200	Remote area	Science	Collaborative	Production	Observation	9	Enter button to make space between the different sentences.	1	0	0	0	0	0	0	0	0	0	0	0	0	0	1	0	0	0	0	0	0	0	0	0	1	0	0	0	0	0	0	0	0	0	0	0	0	1
658	658	Smartphone	Student 3	<200	Remote area	Science	Collaborative	Production	Observation	10	Home button to naivgate .	1	0	0	0	0	0	0	0	0	0	0	0	0	0	1	0	0	0	0	0	0	0	0	0	1	0	0	0	0	0	0	0	0	0	0	0	0	0
659	659	Smartphone	Student 3	<200	Remote area	Science	Collaborative	Production	Observation	11	Tap on the Whatsapp window .	0	1	0	1	1	0	1	0	0	0	0	0	0	0	1	0	1	0	0	0	0	0	0	0	1	0	0	0	0	0	0	0	0	0	0	0	0	0
660	660	Smartphone	Student 3	<200	Remote area	Science	Collaborative	Consumption	Observation	12	Selects the ppt template on the laptop by using the layout in the toolbar .	0	0	0	0	0	0	0	1	0	0	0	0	0	0	1	1	1	0	0	0	0	0	0	0	1	0	0	0	0	1	1	0	0	0	0	0	0	1
661	661	Smartphone	Student 3	<200	Remote area	Science	Collaborative	Consumption	Observation	13	Uses pictures in Power point through the insert in the toolbar .	0	0	0	0	0	0	0	0	0	0	0	0	0	0	1	0	1	0	0	0	0	1	0	0	1	0	0	0	0	1	1	0	0	0	0	0	0	1
662	662	Smartphone	Student 3	<200	Remote area	Science	Collaborative	Production	Observation	14	Zoom function in the Google document to enlarge the size of the text .	0	0	1	0	0	0	1	0	0	0	0	1	0	0	0	0	1	0	0	0	0	0	0	1	0	1	0	0	0	0	0	0	0	0	0	0	0	1
663	663	Smartphone	Student 3	<200	Remote area	Science	Collaborative	Production	Observation	15	Font - large (bold?) for the title and smaller for the rest of the text .	0	0	1	0	0	0	0	0	0	0	0	1	0	0	0	0	0	0	0	0	0	0	0	0	0	0	0	0	0	0	0	0	0	0	0	0	0	1
664	664	Smartphone	Student 3	<200	Remote area	Science	Collaborative	Consumption	Observation	16	cursor becomes temporary in the Notes document when the student position it there.	0	0	0	0	0	0	0	0	0	0	0	0	0	1	1	0	1	0	0	0	0	0	0	0	1	0	0	0	0	0	1	0	0	0	0	0	0	0
665	665	Smartphone	Student 3	<200	Remote area	Science	Collaborative	Production	Observation	17	Discussion about which PowerPoint template to choose yellow is chosen to match the theme - the sun's rays .	0	0	0	0	0	0	1	0	0	0	0	0	0	0	0	0	0	1	0	0	0	1	0	0	0	0	1	1	0	0	0	0	0	0	0	0	1	1
666	666	Smartphone	Student 3	<200	Remote area	Science	Collaborative	Production	Observation	18	Frame in PowerPoint within which the text is written and which can be enlarged .	0	0	1	0	0	0	1	0	0	0	0	1	0	0	0	0	1	1	0	0	0	1	0	1	0	0	0	0	0	0	0	0	0	0	0	0	0	0
667	667	Smartphone	Student 3	<200	Remote area	Science	Collaborative	Production	Observation	19	Discussion about the group's work and how it should go.	0	0	0	0	0	0	0	0	0	0	0	0	0	0	0	0	0	0	0	0	0	1	0	0	0	0	0	0	0	0	0	0	0	0	0	0	1	0
668	668	Smartphone	Student 3	<200	Remote area	Science	Collaborative	Production	Observation	20	Writing text on the smartphone , read aloud on the monitor .	0	0	1	0	0	1	0	1	0	1	0	1	0	0	0	0	0	0	0	0	0	1	0	0	0	0	0	0	0	0	0	0	0	0	0	1	1	0
669	669	Smartphone	Student 3	<200	Remote area	Science	Collaborative	Production	Observation	21	Individually write in Padlet about the weather .	0	0	1	0	0	0	1	0	0	1	0	1	0	0	0	0	0	0	0	0	0	1	0	0	0	1	1	1	0	0	0	0	0	0	0	0	1	0
670	670	Smartphone	Student 3	<200	Remote area	Science	Collaborative	Production	Observation	22	The teacher does an evaluation and the students get to answer with their prior knowledge via Padlet .	0	0	0	0	0	0	1	0	0	0	1	1	0	0	0	0	0	0	0	0	0	1	0	0	0	1	0	0	0	0	0	0	0	0	0	0	0	0
671	671	Smartphone	Student 3	<200	Remote area	Science	Collaborative	Consumption	Observation	23	Get to watch a film moving images about the weather .	0	0	0	0	0	0	1	1	0	1	0	0	0	0	0	0	0	1	0	0	0	0	0	0	0	0	1	1	0	0	0	0	0	0	0	0	1	1
672	672	Smartphone	Student 3	<200	Remote area	Science	Collaborative	Consumption	Observation	24	Access information via links on the smartphone .	0	0	0	1	0	0	0	0	0	0	0	0	0	0	1	0	1	0	0	0	0	0	0	0	1	0	0	0	0	1	0	0	0	0	0	1	1	0
673	673	Smartphone	Student 3	<200	Remote area	Science	Collaborative	Consumption	Observation	25	Uses the smartphone to access information on the WhatsApp .	0	1	0	1	0	0	1	0	0	0	0	0	0	0	0	0	1	0	0	0	0	0	0	0	0	0	0	0	0	0	0	0	0	0	0	1	1	0
674	674	Smartphone	Student 3	<200	Remote area	Science	Collaborative	Consumption	Observation	26	Reads a text on the monitor .	0	0	1	0	0	1	0	1	0	1	0	1	0	0	0	0	0	0	0	0	0	0	0	0	0	0	0	0	0	0	0	0	0	0	0	0	1	0
675	675	Smartphone	Student 3	<200	Remote area	Science	Collaborative	Consumption	Observation	27	The students read the text individually .	0	0	1	0	0	0	0	1	0	1	0	1	0	0	0	0	0	0	0	0	0	0	0	0	0	0	0	0	0	0	0	0	0	0	0	0	1	0
676	676	Smartphone	Student 3	<200	Remote area	Science	Collaborative	Production	Observation	28	The student who writes on a smartphone gaze at the text commit by the student who is online.	0	0	1	1	0	0	0	0	0	0	0	1	0	0	0	0	1	0	0	0	0	1	0	0	0	0	0	0	1	0	0	0	0	0	0	1	0	0
677	677	Smartphone	Student 3	<200	Remote area	Science	Collaborative	Production	Observation	29	Turns on the camera on the camera icon and play-in the laptop to select the powerpoint template .	1	0	0	1	0	0	1	1	0	0	0	0	0	0	1	1	1	1	0	0	0	0	0	0	1	0	0	0	0	0	1	0	0	0	0	0	0	1
678	678	Smartphone	Student 3	<200	Remote area	Science	Collaborative	Production	Observation	30	Discuss which pictures to choose.	0	0	0	0	0	0	0	0	0	0	0	0	0	0	0	0	0	0	0	0	0	1	0	0	0	0	0	0	0	0	0	0	0	0	0	0	1	1
679	679	Smartphone	Student 3	<200	Remote area	Science	Collaborative	Production	Observation	31	Navigate with mouse pad .	0	0	0	1	0	0	0	0	0	0	0	0	0	0	1	0	1	0	0	0	0	0	0	0	0	0	0	0	0	0	0	0	0	1	0	0	0	0
680	680	Smartphone	Student 3	<200	Remote area	Science	Collaborative	Production	Observation	32	Add the pictures .	0	0	0	0	0	0	0	0	0	0	0	0	0	0	0	0	1	0	0	0	0	1	0	0	0	0	0	0	0	0	1	0	0	0	0	0	0	1
[truncated: 3 more columns]
